# Supplementary material for: Advanced scientific information mining using LLM-driven approaches in layered cathode materials for sodium-ion batteries
Source: Royal Society of Chemistry journal article supplement (doi:10.1039/d5ma00004a), 2025-01-01
Supplement: d5ma00004a2.xlsx [file d5ma00004a2.xlsx]

## Sheet: DB
Index	Meta data				Specific Strategy		Material & Performance Data						Electrode composition
	Title	Year	Journal	DOI	Purpose	Strategy	Composition	Crystal	Coating	Morphology	Upper voltage	Lower voltage	Active material content	conductive additive	Conductive additive content	Binder	Binder content
1	Impact of Potassium in Layered Cobalt Oxide Cathodes on Electrochemical Performance in Sodium-Ion Batteries	2024	Advanced Functional Materials	10.1002/adfm.202406384	Cyclability	Doping	K0.7Fe0.5Mn0.5O2				4	1.5	80	Super P carbon	10	PTFE	10
2	Impact of Potassium in Layered Cobalt Oxide Cathodes on Electrochemical Performance in Sodium-Ion Batteries	2024	Advanced Functional Materials	10.1002/adfm.202406384	Cyclability	Doping	Na0.7Fe0.5Mn0.5O2				4.2	1.6	80	Super P carbon	10	PTFE	10
3	Impact of Potassium in Layered Cobalt Oxide Cathodes on Electrochemical Performance in Sodium-Ion Batteries	2024	Advanced Functional Materials	10.1002/adfm.202406384	Cyclability	Doping	K0.5Co0.33Mn0.67O2	layered			4.2	1.6	80	Super P carbon	10	PTFE	10
4	Impact of Potassium in Layered Cobalt Oxide Cathodes on Electrochemical Performance in Sodium-Ion Batteries	2024	Advanced Functional Materials	10.1002/adfm.202406384	Cyclability	Doping	K0.5Co0.33Mn0.67O2*0.5H2O	layered			4.2	1.6	80	Super P carbon	10	PTFE	10
5	Impact of Potassium in Layered Cobalt Oxide Cathodes on Electrochemical Performance in Sodium-Ion Batteries	2024	Advanced Functional Materials	10.1002/adfm.202406384	Cyclability	Doping	K0.1Na0.7Co0.8Ti0.2O2	P63/mmc			4.2	1.6	80	Super P carbon	10	PTFE	10
6	High-Entropy Layered Oxide Cathode Enabling High-Rate for Solid-State Sodium-Ion Batteries	2024	Nano-Micro Letters	10.1007/s40820-023-01232-0	power	Composition	Na0.95Li0.06Ni0.25Cu0.05Fe0.15Mn0.49O2	O3		spherical	4.2	2
7	High-Entropy Layered Oxide Cathode Enabling High-Rate for Solid-State Sodium-Ion Batteries	2024	Nano-Micro Letters	10.1007/s40820-023-01232-0	power	Composition	Na0.67Mn0.5Fe0.5O2				4.2	2
8	High-Entropy Layered Oxide Cathode Enabling High-Rate for Solid-State Sodium-Ion Batteries	2024	Nano-Micro Letters	10.1007/s40820-023-01232-0	power	Composition	Na0.67Ni0.33Mn0.67O2				4.2	2
9	A novel hierarchical book-like structured sodium manganite for high-stable sodium-ion batteries	2023	RSC Advances	10.1039/d2ra05524d	Cyclability	Morphology	Na0.7MnO2.05	hexagonal		book-like	4.5	1.5	75	Ketjen black	15	poly (vinylidene fluoride)	10
10	A novel hierarchical book-like structured sodium manganite for high-stable sodium-ion batteries	2023	RSC Advances	10.1039/d2ra05524d	Cyclability	Morphology	Na0.7MnO2.05@NaPO3	P2	NaPO3	book-like	4.5	1.5	75	Ketjen black	15	poly (vinylidene fluoride)	10
11	A novel hierarchical book-like structured sodium manganite for high-stable sodium-ion batteries	2023	RSC Advances	10.1039/d2ra05524d	Cyclability	Morphology	Na0.7MnO2.05@AlPO4	P2	AlPO4	book-like	4.5	1.5	75	Ketjen black	15	poly (vinylidene fluoride)	10
12	A novel hierarchical book-like structured sodium manganite for high-stable sodium-ion batteries	2023	RSC Advances	10.1039/d2ra05524d	Cyclability	Morphology	Na0.7MnO2.05@PPy	P2	PPy	book-like	4.5	1.5	75	Ketjen black	15	poly (vinylidene fluoride)	10
13	A novel hierarchical book-like structured sodium manganite for high-stable sodium-ion batteries	2023	RSC Advances	10.1039/d2ra05524d	Cyclability	Morphology	NaNi0.5Mn0.5O2@Na2/3MnO2	O3	P2		4.5	1.5	75	Ketjen black	15	poly (vinylidene fluoride)	10
14	High-Entropy and Superstructure-Stabilized Layered Oxide Cathodes for Sodium-Ion Batteries	2022	Advanced Energy Materials	10.1002/aenm.202201989	Cyclability	Composition	Na2/3Li1/6Fe1/6Co1/6Ni1/6Mn1/3O2	O3		particle	4.5	2	70	carbon black	20	PVDF	10
15	High-Entropy and Superstructure-Stabilized Layered Oxide Cathodes for Sodium-Ion Batteries	2022	Advanced Energy Materials	10.1002/aenm.202201989	Cyclability	Composition	NaNi0.5Mn0.5O2				4.5	2	70	carbon black	20	PVDF	10
16	High-Entropy and Superstructure-Stabilized Layered Oxide Cathodes for Sodium-Ion Batteries	2022	Advanced Energy Materials	10.1002/aenm.202201989	Cyclability	Composition	NaFe0.5Mn0.5O2				4.5	2	70	carbon black	20	PVDF	10
17	High-Entropy and Superstructure-Stabilized Layered Oxide Cathodes for Sodium-Ion Batteries	2022	Advanced Energy Materials	10.1002/aenm.202201989	Cyclability	Composition	NaCo0.5Mn0.5O2				4.5	2	70	carbon black	20	PVDF	10
18	High-Entropy and Superstructure-Stabilized Layered Oxide Cathodes for Sodium-Ion Batteries	2022	Advanced Energy Materials	10.1002/aenm.202201989	Cyclability	Composition	NaNi0.5Co0.5O2	O3		uniform	4.5	2	70	carbon black	20	PVDF	10
19	Structural Evolution of Air-Exposed Layered Oxide Cathodes for Sodium-Ion Batteries: An Example of Ni-doped NaxMnO2	2023	Chemistry of Materials	10.1021/acs.chemmater.3c01196	Cyclability	Composition	Na0.67Mn0.9Ni0.1O2	birnessite			4.1	2.5	80	Super-P	10	PVDF	10
20	Structural Evolution of Air-Exposed Layered Oxide Cathodes for Sodium-Ion Batteries: An Example of Ni-doped NaxMnO2	2023	Chemistry of Materials	10.1021/acs.chemmater.3c01196	Cyclability	Composition	Na0.67Ni0.33Mn0.67O2	birnessite		powders	4.1	2.5	80	Super-P	10	PVDF	10
21	Structural Evolution of Air-Exposed Layered Oxide Cathodes for Sodium-Ion Batteries: An Example of Ni-doped NaxMnO2	2023	Chemistry of Materials	10.1021/acs.chemmater.3c01196	Cyclability	Composition	Na0.67MnO2	birnessite			4.1	2.5	80	Super-P	10	PVDF	10
22	Structural Evolution of Air-Exposed Layered Oxide Cathodes for Sodium-Ion Batteries: An Example of Ni-doped NaxMnO2	2023	Chemistry of Materials	10.1021/acs.chemmater.3c01196	Cyclability	Composition	Na2/3Fe1/3Mn2/3O2	birnessite			4.1	2.5	80	Super-P	10	PVDF	10
23	Structural Evolution of Air-Exposed Layered Oxide Cathodes for Sodium-Ion Batteries: An Example of Ni-doped NaxMnO2	2023	Chemistry of Materials	10.1021/acs.chemmater.3c01196	Cyclability	Composition	Na2/3Li1/9Ni2/9Li1/9Mn2/3O2				4.1	2.5	80	Super-P	10	PVDF	10
24	Synergistic activation of anionic redox via cosubstitution to construct high-capacity layered oxide cathode materials for sodium-ion batteries	2023	Science Bulletin	10.1016/j.scib.2022.12.022	Capacity	Doping	Na0.72Li0.24Mn0.76O2	P2phase		hexagonalsheet	4.5	1.5	70	acetylene black	20	polyvinylidene fluoride (PVDF)	10
25	Synergistic activation of anionic redox via cosubstitution to construct high-capacity layered oxide cathode materials for sodium-ion batteries	2023	Science Bulletin	10.1016/j.scib.2022.12.022	Capacity	Doping	Na0.67Mg0.28Mn0.72O2	P2		hexagonalsheet	4.5	1.5	70	acetylene black	20	polyvinylidene fluoride (PVDF)	10
26	Synergistic activation of anionic redox via cosubstitution to construct high-capacity layered oxide cathode materials for sodium-ion batteries	2023	Science Bulletin	10.1016/j.scib.2022.12.022	Capacity	Doping	Na0.67Mg0.1Zn0.1Mn0.8O2	P2		hexagonalsheet	4.5	1.5	70	acetylene black	20	polyvinylidene fluoride (PVDF)	10
27	Synergistic activation of anionic redox via cosubstitution to construct high-capacity layered oxide cathode materials for sodium-ion batteries	2023	Science Bulletin	10.1016/j.scib.2022.12.022	Capacity	Doping	Na2/3Mg1/3Ti1/6Mn1/2O2	P2		hexagonalsheet	4.5	1.5	70	acetylene black	20	polyvinylidene fluoride (PVDF)	10
28	Synergistic activation of anionic redox via cosubstitution to construct high-capacity layered oxide cathode materials for sodium-ion batteries	2023	Science Bulletin	10.1016/j.scib.2022.12.022	Capacity	Doping	LiLi0.2Ni0.2Mn0.6O2	P2		hexagonalsheet	4.5	1.5	70	acetylene black	20	polyvinylidene fluoride (PVDF)	10
29	Annealing in Argon Universally Upgrades the Na-Storage Performance of Mn-Based Layered Oxide Cathodes by Creating Bulk Oxygen Vacancies	2023	Angewandte Chemie - International Edition	10.1002/anie.202219230	Cyclability	Composition	Na0.75Mg0.25Mn0.75O2	hexagonal		flake-like	3.9	1.4
30	Annealing in Argon Universally Upgrades the Na-Storage Performance of Mn-Based Layered Oxide Cathodes by Creating Bulk Oxygen Vacancies	2023	Angewandte Chemie - International Edition	10.1002/anie.202219230	Cyclability	Composition	Na0.67Mn0.67Ni0.33O2				4	1.5
31	Annealing in Argon Universally Upgrades the Na-Storage Performance of Mn-Based Layered Oxide Cathodes by Creating Bulk Oxygen Vacancies	2023	Angewandte Chemie - International Edition	10.1002/anie.202219230	Cyclability	Composition	Na0.67Mn0.67Co0.33O2				4	1.5
32	Annealing in Argon Universally Upgrades the Na-Storage Performance of Mn-Based Layered Oxide Cathodes by Creating Bulk Oxygen Vacancies	2023	Angewandte Chemie - International Edition	10.1002/anie.202219230	Cyclability	Composition	Na0.67Mn0.67Fe0.33O2				4	1.5
33	Annealing in Argon Universally Upgrades the Na-Storage Performance of Mn-Based Layered Oxide Cathodes by Creating Bulk Oxygen Vacancies	2023	Angewandte Chemie - International Edition	10.1002/anie.202219230	Cyclability	Composition	Na0.67Mn0.67Ti0.33O2				4	1.5
34	High-Entropy Configuration Strategy to Build High Performance Na-Ion Layered Oxide Cathodes Derived from Simple Techniques	2024	Langmuir	10.1021/acs.langmuir.4c00676	Capacity	Composition	NaNi0.25Fe0.15Mn0.3Ti0.1Sn0.05Co0.05Li0.1O2	O3			4.3	2.7
35	High-Entropy Configuration Strategy to Build High Performance Na-Ion Layered Oxide Cathodes Derived from Simple Techniques	2024	Langmuir	10.1021/acs.langmuir.4c00676	Capacity	Composition	Na0.67Ni0.33Mn0.67O2	O3			4.3	2.7
36	High-Entropy Configuration Strategy to Build High Performance Na-Ion Layered Oxide Cathodes Derived from Simple Techniques	2024	Langmuir	10.1021/acs.langmuir.4c00676	Capacity	Composition	NaNi0.5Mn0.5O2	O3		layered	4.3	2
37	High-Entropy Configuration Strategy to Build High Performance Na-Ion Layered Oxide Cathodes Derived from Simple Techniques	2024	Langmuir	10.1021/acs.langmuir.4c00676	Capacity	Composition	NaNi0.5Mn0.5O2withCuandTisubstitution	O3			4.3	2
38	High-Entropy Configuration Strategy to Build High Performance Na-Ion Layered Oxide Cathodes Derived from Simple Techniques	2024	Langmuir	10.1021/acs.langmuir.4c00676	Capacity	Composition	NaNi0.5Mn0.5O2withFesubstitution	O3		layered	4.3	2
39	Clarification of underneath capacity loss for O3-type Ni, co free layered cathodes at high voltage for sodium ion batteries	2023	Journal of Energy Chemistry	10.1016/j.jechem.2022.11.031	Cyclability	Composition	NaFe0.5Mn0.5O2	O3		irregular	4.5		80	TIMCAL Super C65	10	polyvinylidene difluoride (PVdF)	10
40	Clarification of underneath capacity loss for O3-type Ni, co free layered cathodes at high voltage for sodium ion batteries	2023	Journal of Energy Chemistry	10.1016/j.jechem.2022.11.031	Cyclability	Composition	Na0.9Cu0.22Fe0.3Mn0.48O2				4.5	1.5	80	TIMCAL Super C65	10	polyvinylidene difluoride (PVdF)	10
41	Clarification of underneath capacity loss for O3-type Ni, co free layered cathodes at high voltage for sodium ion batteries	2023	Journal of Energy Chemistry	10.1016/j.jechem.2022.11.031	Cyclability	Composition	NaFeO2	O3			4.5		80	TIMCAL Super C65	10	polyvinylidene difluoride (PVdF)	10
42	Clarification of underneath capacity loss for O3-type Ni, co free layered cathodes at high voltage for sodium ion batteries	2023	Journal of Energy Chemistry	10.1016/j.jechem.2022.11.031	Cyclability	Composition	NaCrO2				4.5	1.5	80	TIMCAL Super C65	10	polyvinylidene difluoride (PVdF)	10
43	Clarification of underneath capacity loss for O3-type Ni, co free layered cathodes at high voltage for sodium ion batteries	2023	Journal of Energy Chemistry	10.1016/j.jechem.2022.11.031	Cyclability	Composition	NaTiO2	OP2			3	0.01	80	TIMCAL Super C65	10	polyvinylidene difluoride (PVdF)	10
44	Investigation on the Air Stability of P2-Layered Transition Metal Oxides by Nb Doping in Sodium Ion Batteries	2023	Batteries	10.3390/batteries9030183	Air stability	Doping	Na0.67Mn0.5Fe0.5O2	hexagonal		particles	4	2	80	Super P	10	PVDF	10
45	Investigation on the Air Stability of P2-Layered Transition Metal Oxides by Nb Doping in Sodium Ion Batteries	2023	Batteries	10.3390/batteries9030183	Air stability	Doping	Na0.67Mn0.67Ni0.33Nb0.03O2	hexagonal		particles	4	2	80	Super P	10	PVDF	10
46	Investigation on the Air Stability of P2-Layered Transition Metal Oxides by Nb Doping in Sodium Ion Batteries	2023	Batteries	10.3390/batteries9030183	Air stability	Doping	Na0.67CoO2	hexagonal			4	2	80	Super P	10	PVDF	10
47	Investigation on the Air Stability of P2-Layered Transition Metal Oxides by Nb Doping in Sodium Ion Batteries	2023	Batteries	10.3390/batteries9030183	Air stability	Doping	Na0.67Ni0.33Mn0.67O2	hexagonal		particles	4	2	80	Super P	10	PVDF	10
48	High-Entropy Co-Free O3-Type Layered Oxyfluoride: A Promising Air-Stable Cathode for Sodium-Ion Batteries	2023	Advanced Materials	10.1002/adma.202304440	Air stability	Composition	Na0.9Li0.1Ni0.4Fe0.2Mn0.4Ti0.04Mn0.04Mg0.02O1.9F0.1	O3-layered		layered	4.3	2				PVDF
49	A comparative study of the effect of synthesis method on the formation of P2- and P3-Na0.67Mn0.9Mg0.1O2 cathodes	2023	Materials Research Express	10.1088/2053-1591/ace49f	Capacity	Composition	Na0.67Mn0.54Ni0.13Fe0.13O2	P3	gold		4	1.5	80	C65	10	PVDF	10
50	A comparative study of the effect of synthesis method on the formation of P2- and P3-Na0.67Mn0.9Mg0.1O2 cathodes	2023	Materials Research Express	10.1088/2053-1591/ace49f	Capacity	Composition	Na2/3Mn0.8Fe0.1Ti0.1O2		gold		4	1.5	80	C65	10	PVDF	10
51	A comparative study of the effect of synthesis method on the formation of P2- and P3-Na0.67Mn0.9Mg0.1O2 cathodes	2023	Materials Research Express	10.1088/2053-1591/ace49f	Capacity	Composition	Na0.67Fe1/2Mn1/2O2		gold		4	1.5	80	C65	10	PVDF	10
52	A comparative study of the effect of synthesis method on the formation of P2- and P3-Na0.67Mn0.9Mg0.1O2 cathodes	2023	Materials Research Express	10.1088/2053-1591/ace49f	Capacity	Composition	Na0.9Ni0.5Mn0.5O2		gold		4	1.5	80	C65	10	PVDF	10
53	Air degradation and rehealing of high-voltage Na0.7Ni0.35Sn0.65O2 cathode for sodium ion batteries; [钠离子高电压正极Na0.7Ni0.35Sn0.65O2材料在空气中的 劣化及修复机理]	2023	Science China Materials	10.1007/s40843-022-2166-9	Air stability	Other	NaNi0.5Mn0.3Ti0.2O2	R3-m		agglomerated	4	2	70	super P	20	polyvinylidene fluoride	10
54	Air degradation and rehealing of high-voltage Na0.7Ni0.35Sn0.65O2 cathode for sodium ion batteries; [钠离子高电压正极Na0.7Ni0.35Sn0.65O2材料在空气中的 劣化及修复机理]	2023	Science China Materials	10.1007/s40843-022-2166-9	Air stability	Other	NaNi1/3Fe1/3Mn1/3O2	R3-m		agglomerated	4	2	70	super P	20	polyvinylidene fluoride	10
55	Air degradation and rehealing of high-voltage Na0.7Ni0.35Sn0.65O2 cathode for sodium ion batteries; [钠离子高电压正极Na0.7Ni0.35Sn0.65O2材料在空气中的 劣化及修复机理]	2023	Science China Materials	10.1007/s40843-022-2166-9	Air stability	Other	Na0.7Ni0.35Sn0.65O2	R3-m		agglomerated	4	2	70	super P	20	polyvinylidene fluoride	10
56	Air degradation and rehealing of high-voltage Na0.7Ni0.35Sn0.65O2 cathode for sodium ion batteries; [钠离子高电压正极Na0.7Ni0.35Sn0.65O2材料在空气中的 劣化及修复机理]	2023	Science China Materials	10.1007/s40843-022-2166-9	Air stability	Other	NaNi0.60Fe0.25Mn0.15O2	R3-m		agglomerated	4	2	70	super P	20	polyvinylidene fluoride	10
57	High-Performance Full Sodium Cells Based on MgO-Treated P2-Type Na0.67(Mn0.5Fe0.5)1−xCoxO2 Cathodes	2023	Batteries	10.3390/batteries9100497	Capacity	Coating	Na2/3(Mn1/2Fe1/2)O2	P2		plate-like	4.3	2	70	super carbon	15	PVDF	15
58	High-Performance Full Sodium Cells Based on MgO-Treated P2-Type Na0.67(Mn0.5Fe0.5)1−xCoxO2 Cathodes	2023	Batteries	10.3390/batteries9100497	Capacity	Coating	Na2/3(Mn1/2Fe1/2)0.9Co0.1O2	P2		plate-like	4.3	2	70	super carbon	15	PVDF	15
59	High-Performance Full Sodium Cells Based on MgO-Treated P2-Type Na0.67(Mn0.5Fe0.5)1−xCoxO2 Cathodes	2023	Batteries	10.3390/batteries9100497	Capacity	Coating	Na0.67MnO2	P2		plate-like	4	2	70	super carbon	15	PVDF	15
60	High-Performance Full Sodium Cells Based on MgO-Treated P2-Type Na0.67(Mn0.5Fe0.5)1−xCoxO2 Cathodes	2023	Batteries	10.3390/batteries9100497	Capacity	Coating	Na0.67Ni0.33Mn0.67O2	P2			4	2	70	super carbon	15	PVDF	15
61	High-Performance Full Sodium Cells Based on MgO-Treated P2-Type Na0.67(Mn0.5Fe0.5)1−xCoxO2 Cathodes	2023	Batteries	10.3390/batteries9100497	Capacity	Coating	Na0.67Ni0.17Co0.17Mn0.66O2	P2		plate-like	4	2	70	super carbon	15	PVDF	15
62	Effects of the Mn/Ni ratio on the battery performance of layered Na-Ni-Mn oxide cathode materials in sodium-ion batteries	2024	Ionics	10.1007/s11581-023-05277-4	Cyclability	Composition	Na0.8MnO2				4.25	2	80	acetylene black	10	polyvinylidene difluoride (PVDF)	10
63	Effects of the Mn/Ni ratio on the battery performance of layered Na-Ni-Mn oxide cathode materials in sodium-ion batteries	2024	Ionics	10.1007/s11581-023-05277-4	Cyclability	Composition	Na0.8Ni0.1Mn0.9O2	hexagonal		sphere-like	4.25	2	80	acetylene black	10	polyvinylidene difluoride (PVDF)	10
64	Effects of the Mn/Ni ratio on the battery performance of layered Na-Ni-Mn oxide cathode materials in sodium-ion batteries	2024	Ionics	10.1007/s11581-023-05277-4	Cyclability	Composition	Na0.8Ni0.2Mn0.8O2	hexagonal		sphere-like	4.25	2	80	acetylene black	10	polyvinylidene difluoride (PVDF)	10
65	Effects of the Mn/Ni ratio on the battery performance of layered Na-Ni-Mn oxide cathode materials in sodium-ion batteries	2024	Ionics	10.1007/s11581-023-05277-4	Cyclability	Composition	Na0.8Ni0.3Mn0.7O2	hexagonal		sphere-like	4.25	2	80	acetylene black	10	polyvinylidene difluoride (PVDF)	10
66	Effects of the Mn/Ni ratio on the battery performance of layered Na-Ni-Mn oxide cathode materials in sodium-ion batteries	2024	Ionics	10.1007/s11581-023-05277-4	Cyclability	Composition	Na0.70Mn0.60Ni0.30Co0.10O2				4.25	2	80	acetylene black	10	polyvinylidene difluoride (PVDF)	10
67	High-Performance Zr-Doped P3-Type Na0.67Ni0.33Mn0.67O2 Cathode for Na-Ion Battery Applications	2023	Crystals	10.3390/cryst13091339	Cyclability	Doping	Na2/3Mn2/3Ni1/3O2	P3		randomshapes	4	2	80	multiwalled carbon nano-tubes	10	polyvinylidene fluoride	10
68	High-Performance Zr-Doped P3-Type Na0.67Ni0.33Mn0.67O2 Cathode for Na-Ion Battery Applications	2023	Crystals	10.3390/cryst13091339	Cyclability	Doping	Na0.67Ni0.2Mn0.8O2	P3		randomshapes	4	2	80	multiwalled carbon nano-tubes	10	polyvinylidene fluoride	10
69	High-Performance Zr-Doped P3-Type Na0.67Ni0.33Mn0.67O2 Cathode for Na-Ion Battery Applications	2023	Crystals	10.3390/cryst13091339	Cyclability	Doping	Na0.6MnO2	P3		randomshapes	4	2	80	multiwalled carbon nano-tubes	10	polyvinylidene fluoride	10
70	High-Performance Zr-Doped P3-Type Na0.67Ni0.33Mn0.67O2 Cathode for Na-Ion Battery Applications	2023	Crystals	10.3390/cryst13091339	Cyclability	Doping	Na2/3Ni1/3Mn2/3O2	hexagonal		randomshapes	4	2	80	multiwalled carbon nano-tubes	10	polyvinylidene fluoride	10
71	Enhanced electrochemical performance of sodium cathode materials with partial substitution of Zr	2023	Electrochemistry Communications	10.1016/j.elecom.2022.107413	Cyclability	Doping	NaNi0.5Mn0.5O2	O3			4.5	2.2
72	Enhanced electrochemical performance of sodium cathode materials with partial substitution of Zr	2023	Electrochemistry Communications	10.1016/j.elecom.2022.107413	Cyclability	Doping	NaMn0.5Ni0.5O2	O3			4.5	1.5
73	Enhanced electrochemical performance of sodium cathode materials with partial substitution of Zr	2023	Electrochemistry Communications	10.1016/j.elecom.2022.107413	Cyclability	Doping	NaNi0.5Mn0.5O2	O3			4.5	2.2
74	Enhanced electrochemical performance of sodium cathode materials with partial substitution of Zr	2023	Electrochemistry Communications	10.1016/j.elecom.2022.107413	Cyclability	Doping	NaMn0.5Ni0.5O2	O3			4.5	1.5
75	Superior rate performance and structural evolution of O3-type layered NaCrO2 for sodium ion batteries at high temperatures; [钠离子电池用O3型层状NaCrO2正极材料在高温下的优异倍率性能和结构演变]	2023	Science China Materials	10.1007/s40843-023-2493-9	Cyclability	Composition	NaCrO2	O3		angular	3.6	2.3	80	acetylene black	10	polyvinylidene fluoride (PVDF)	10
76	Superior rate performance and structural evolution of O3-type layered NaCrO2 for sodium ion batteries at high temperatures; [钠离子电池用O3型层状NaCrO2正极材料在高温下的优异倍率性能和结构演变]	2023	Science China Materials	10.1007/s40843-023-2493-9	Cyclability	Composition	NaFeO2				3.6	2.3	80	acetylene black	10	polyvinylidene fluoride (PVDF)	10
77	Superior rate performance and structural evolution of O3-type layered NaCrO2 for sodium ion batteries at high temperatures; [钠离子电池用O3型层状NaCrO2正极材料在高温下的优异倍率性能和结构演变]	2023	Science China Materials	10.1007/s40843-023-2493-9	Cyclability	Composition	NaCoO2				3.6	2.3	80	acetylene black	10	polyvinylidene fluoride (PVDF)	10
78	Superior rate performance and structural evolution of O3-type layered NaCrO2 for sodium ion batteries at high temperatures; [钠离子电池用O3型层状NaCrO2正极材料在高温下的优异倍率性能和结构演变]	2023	Science China Materials	10.1007/s40843-023-2493-9	Cyclability	Composition	NaNiO2				3.6	2.3	80	acetylene black	10	polyvinylidene fluoride (PVDF)	10
79	Superior rate performance and structural evolution of O3-type layered NaCrO2 for sodium ion batteries at high temperatures; [钠离子电池用O3型层状NaCrO2正极材料在高温下的优异倍率性能和结构演变]	2023	Science China Materials	10.1007/s40843-023-2493-9	Cyclability	Composition	NaMnO2				3.6	2.3	80	acetylene black	10	polyvinylidene fluoride (PVDF)	10
80	Cost-effective microwave-assisted O3- type sodium-based layered oxide cathode materials for sodium-ion batteries	2023	Energy Reports	10.1016/j.egyr.2023.07.038	Cyclability	Composition	NaNi0.33Mn0.33O2		Aluminum		3.32	2.79	80	activated carbon	10	PVDF (Polyvinyldifluoride)	10
81	Cost-effective microwave-assisted O3- type sodium-based layered oxide cathode materials for sodium-ion batteries	2023	Energy Reports	10.1016/j.egyr.2023.07.038	Cyclability	Composition	NaMnO2				4	2.75	80	activated carbon	10	PVDF (Polyvinyldifluoride)	10
82	Cost-effective microwave-assisted O3- type sodium-based layered oxide cathode materials for sodium-ion batteries	2023	Energy Reports	10.1016/j.egyr.2023.07.038	Cyclability	Composition	P3-NaCoO2				4		80	activated carbon	10	PVDF (Polyvinyldifluoride)	10
83	Cost-effective microwave-assisted O3- type sodium-based layered oxide cathode materials for sodium-ion batteries	2023	Energy Reports	10.1016/j.egyr.2023.07.038	Cyclability	Composition	NaNi0.33Co0.33Fe0.33O2	hexagonal	aluminum		3.32	2.79	80	activated carbon	10	PVDF (Polyvinyldifluoride)	10
84	Impact of Ti and Zn Dual-Substitution in P2 Type Na2/3Ni1/3Mn2/3O2 on Ni–Mn and Na-Vacancy Ordering and Electrochemical Properties	2023	Advanced Materials	10.1002/adma.202300714	Cyclability	Doping	Na2/3Ni1/3Mn2/3O2	hexagonal			4.5	2.5	80	acetylene black	10	poly(vinylidene fluoride) (PVdF)	10
85	Impact of Ti and Zn Dual-Substitution in P2 Type Na2/3Ni1/3Mn2/3O2 on Ni–Mn and Na-Vacancy Ordering and Electrochemical Properties	2023	Advanced Materials	10.1002/adma.202300714	Cyclability	Doping	NaNi0.12Cu0.12Mg0.12Fe0.15Co0.15Mn0.1Ti0.1Sn0.1Sb0.04O2				4.5	2.5	80	acetylene black	10	poly(vinylidene fluoride) (PVdF)	10
86	Impact of Ti and Zn Dual-Substitution in P2 Type Na2/3Ni1/3Mn2/3O2 on Ni–Mn and Na-Vacancy Ordering and Electrochemical Properties	2023	Advanced Materials	10.1002/adma.202300714	Cyclability	Doping	Na2/3Ni1/4Mn1/2Ti1/6Zn1/12O2	P2			4.5	2.5	80	acetylene black	10	poly(vinylidene fluoride) (PVdF)	10
87	Impact of Ti and Zn Dual-Substitution in P2 Type Na2/3Ni1/3Mn2/3O2 on Ni–Mn and Na-Vacancy Ordering and Electrochemical Properties	2023	Advanced Materials	10.1002/adma.202300714	Cyclability	Doping	Na2/3Ni1/4Mn1/2Ti1/6Cu1/12O2	P2			4.5	2.5	80	acetylene black	10	poly(vinylidene fluoride) (PVdF)	10
88	Impact of Ti and Zn Dual-Substitution in P2 Type Na2/3Ni1/3Mn2/3O2 on Ni–Mn and Na-Vacancy Ordering and Electrochemical Properties	2023	Advanced Materials	10.1002/adma.202300714	Cyclability	Doping	Na2/3Ni1/4Mn1/2Ti1/6Mg1/12O2	P2			4.5	2.5	80	acetylene black	10	poly(vinylidene fluoride) (PVdF)	10
89	P2-type Na0.67Fe0.5Mn0.35Co0.15O2 cathode modified by an active coating layer of K2Na(Co(NO2)6) for sodium-ion batteries with improved cycling stability	2024	Journal of Alloys and Compounds	10.1016/j.jallcom.2023.172531	Cyclability	Coating	Na0.67Fe0.5Mn0.5O2	P2	KNC		4.2	1.5	80	carbon black	10	PVdF	10
90	P2-type Na0.67Fe0.5Mn0.35Co0.15O2 cathode modified by an active coating layer of K2Na(Co(NO2)6) for sodium-ion batteries with improved cycling stability	2024	Journal of Alloys and Compounds	10.1016/j.jallcom.2023.172531	Cyclability	Coating	Na0.67Fe0.5Mn0.35Co0.15O2	P2	KNC		4.2	1.5	80	carbon black	10	PVdF	10
91	P2-type Na0.67Fe0.5Mn0.35Co0.15O2 cathode modified by an active coating layer of K2Na(Co(NO2)6) for sodium-ion batteries with improved cycling stability	2024	Journal of Alloys and Compounds	10.1016/j.jallcom.2023.172531	Cyclability	Coating	Na2/3Fe1/2Mn1/2O2	P2			4.2	1.5	80	carbon black	10	PVdF	10
92	P2-type Na0.67Fe0.5Mn0.35Co0.15O2 cathode modified by an active coating layer of K2Na(Co(NO2)6) for sodium-ion batteries with improved cycling stability	2024	Journal of Alloys and Compounds	10.1016/j.jallcom.2023.172531	Cyclability	Coating	Na1.0Cu0.22Fe0.30Mn0.48O2				4.2	1.5	80	carbon black	10	PVdF	10
93	P2-type Na0.67Fe0.5Mn0.35Co0.15O2 cathode modified by an active coating layer of K2Na(Co(NO2)6) for sodium-ion batteries with improved cycling stability	2024	Journal of Alloys and Compounds	10.1016/j.jallcom.2023.172531	Cyclability	Coating	Na0.67Ni0.2Co0.2Mn0.6O2	P2	KNC		4.2	1.5	80	carbon black	10	PVdF	10
94	Microwave calcination as a novel route to prepare high performance Mg-doped Na2/3Ni1/3Mn2/3O2 cathodes for sodium-ion batteries	2023	Journal of Electroanalytical Chemistry	10.1016/j.jelechem.2023.117157	Cyclability	Doping	Na2/3Ni1/3Mn2/3O2	P2		hexagonal	4.5	2	80	carbon black	10	PVDF (polyvinylidene fluoride)	10
95	Microwave calcination as a novel route to prepare high performance Mg-doped Na2/3Ni1/3Mn2/3O2 cathodes for sodium-ion batteries	2023	Journal of Electroanalytical Chemistry	10.1016/j.jelechem.2023.117157	Cyclability	Doping	Na0.67Mn0.67Ni0.33O2	P2		hexagonal	4.5	2	80	carbon black	10	PVDF (polyvinylidene fluoride)	10
96	Microwave calcination as a novel route to prepare high performance Mg-doped Na2/3Ni1/3Mn2/3O2 cathodes for sodium-ion batteries	2023	Journal of Electroanalytical Chemistry	10.1016/j.jelechem.2023.117157	Cyclability	Doping	Na2/3Co2/3Mn2/9Ni1/9O2	P2			4.5	2	80	carbon black	10	PVDF (polyvinylidene fluoride)	10
97	Microwave calcination as a novel route to prepare high performance Mg-doped Na2/3Ni1/3Mn2/3O2 cathodes for sodium-ion batteries	2023	Journal of Electroanalytical Chemistry	10.1016/j.jelechem.2023.117157	Cyclability	Doping	Na0.67Mn0.67Ni0.33O2(Co-substituted)	P2		hexagonal	4.5	2	80	carbon black	10	PVDF (polyvinylidene fluoride)	10
98	Microwave calcination as a novel route to prepare high performance Mg-doped Na2/3Ni1/3Mn2/3O2 cathodes for sodium-ion batteries	2023	Journal of Electroanalytical Chemistry	10.1016/j.jelechem.2023.117157	Cyclability	Doping	Mg-dopedNa2/3Ni1/3Mn2/3O2	P2		hexagonal	4.5	2	80	carbon black	10	PVDF (polyvinylidene fluoride)	10
99	Insights into Ti doping for stabilizing the Na2/3Fe1/3Mn2/3O2 cathode in sodium ion battery	2022	Journal of Energy Chemistry	10.1016/j.jechem.2022.06.016	Cyclability	Doping	Na2/3Fe1/3Mn2/3O2				4.3	1.5	80	Super P	10	polyvinylidene fluoride	10
100	Insights into Ti doping for stabilizing the Na2/3Fe1/3Mn2/3O2 cathode in sodium ion battery	2022	Journal of Energy Chemistry	10.1016/j.jechem.2022.06.016	Cyclability	Doping	Na2/3Fe1/3Mn0.57Ti0.1O2	P2			4.3	1.5	80	Super P	10	polyvinylidene fluoride	10
101	Insights into Ti doping for stabilizing the Na2/3Fe1/3Mn2/3O2 cathode in sodium ion battery	2022	Journal of Energy Chemistry	10.1016/j.jechem.2022.06.016	Cyclability	Doping	Na0.67Ni0.33Mn0.67O2				4.3	1.5	80	Super P	10	polyvinylidene fluoride	10
102	Insights into Ti doping for stabilizing the Na2/3Fe1/3Mn2/3O2 cathode in sodium ion battery	2022	Journal of Energy Chemistry	10.1016/j.jechem.2022.06.016	Cyclability	Doping	Na0.67Ni0.33Mn0.33Co0.33O2				4.3	1.5	80	Super P	10	polyvinylidene fluoride	10
103	Insights into Ti doping for stabilizing the Na2/3Fe1/3Mn2/3O2 cathode in sodium ion battery	2022	Journal of Energy Chemistry	10.1016/j.jechem.2022.06.016	Cyclability	Doping	Na0.67Mn0.5Fe0.5O2	P2			4.3	1.5	80	Super P	10	polyvinylidene fluoride	10
104	Effect of Cu substitution on anion redox behaviour in P3-type sodium manganese oxides	2022	JPhys Energy	10.1088/2515-7655/ac95cc	Cyclability	Doping	Na0.78Ni0.23Mn0.69O2				4.3	1.8	75	super C65 carbon	15	Solef binder (modified polyvinylidene fluoride)	10
105	Effect of Cu substitution on anion redox behaviour in P3-type sodium manganese oxides	2022	JPhys Energy	10.1088/2515-7655/ac95cc	Cyclability	Doping	Na2/3Co2/3Mn1/3O2	P3			4.3	1.8	75	super C65 carbon	15	Solef binder (modified polyvinylidene fluoride)	10
106	Effect of Cu substitution on anion redox behaviour in P3-type sodium manganese oxides	2022	JPhys Energy	10.1088/2515-7655/ac95cc	Cyclability	Doping	Na0.67Cu0.28Mn0.72O2	P3			4.3	1.8	75	super C65 carbon	15	Solef binder (modified polyvinylidene fluoride)	10
107	Effect of Cu substitution on anion redox behaviour in P3-type sodium manganese oxides	2022	JPhys Energy	10.1088/2515-7655/ac95cc	Cyclability	Doping	Na0.67Mn0.66Fe0.20Cu0.14O2	P3			4.3	1.8	75	super C65 carbon	15	Solef binder (modified polyvinylidene fluoride)	10
108	Structure and evolution of disordered deep-charge phases in NaxCrO2 Na-ion battery electrodes	2024	Journal of Power Sources	10.1016/j.jpowsour.2023.233875	Mechanism	Composition	NaCrO2	trigonal			3.5	2.5	60	conductive carbon	20	polyvinylidene fluoride	20
109	Structure and evolution of disordered deep-charge phases in NaxCrO2 Na-ion battery electrodes	2024	Journal of Power Sources	10.1016/j.jpowsour.2023.233875	Mechanism	Composition	Na0.25CrO2	trigonal			4	2.5	60	conductive carbon	20	polyvinylidene fluoride	20
110	Structure and evolution of disordered deep-charge phases in NaxCrO2 Na-ion battery electrodes	2024	Journal of Power Sources	10.1016/j.jpowsour.2023.233875	Mechanism	Composition	Na0.40CrO2	O3			3.5	2.5	60	conductive carbon	20	polyvinylidene fluoride	20
111	P2-type layered high-entropy oxides as sodium-ion cathode materials	2022	Materials Futures	10.1088/2752-5724/ac8ab9	Cyclability	Composition	Na0.67(Mn0.55Ni0.21Co0.24)O2	P2		plate-like	4.6	1.5	70	Super C65 carbon black	20	Solef 5130 polyvinylidene fluoride	10
112	P2-type layered high-entropy oxides as sodium-ion cathode materials	2022	Materials Futures	10.1088/2752-5724/ac8ab9	Cyclability	Composition	Na0.67(Mn0.45Ni0.18Co0.24Ti0.1Mg0.03)O2	P2		plate-like	4.6	1.5	70	Super C65 carbon black	20	Solef 5130 polyvinylidene fluoride	10
113	P2-type layered high-entropy oxides as sodium-ion cathode materials	2022	Materials Futures	10.1088/2752-5724/ac8ab9	Cyclability	Composition	Na0.67(Mn0.45Ni0.18Co0.18Ti0.1Mg0.03Al0.04Fe0.02)O2	P2		plate-like	4.6	1.5	70	Super C65 carbon black	20	Solef 5130 polyvinylidene fluoride	10
114	P2-type layered high-entropy oxides as sodium-ion cathode materials	2022	Materials Futures	10.1088/2752-5724/ac8ab9	Cyclability	Composition	Na0.6Cr0.6Ti0.4O2	P2		plate-like	4.6	1.5	70	Super C65 carbon black	20	Solef 5130 polyvinylidene fluoride	10
115	P2-type layered high-entropy oxides as sodium-ion cathode materials	2022	Materials Futures	10.1088/2752-5724/ac8ab9	Cyclability	Composition	Na0.65Ni0.17Co0.11Mn0.72O2	P2		plate-like	4.6	1.5	70	Super C65 carbon black	20	Solef 5130 polyvinylidene fluoride	10
116	Structure, Electrochemical, and Transport Properties of Li- and F-Modified P2-Na2/3Ni1/3Mn2/3O2 Cathode Materials for Na-Ion Batteries	2023	Coatings	10.3390/coatings13030626	Cyclability	Doping	Na2/3Ni1/3Mn2/3O2	P2			4.22		80	Super P	10	PVDF (Kynar 761)	10
117	Structure, Electrochemical, and Transport Properties of Li- and F-Modified P2-Na2/3Ni1/3Mn2/3O2 Cathode Materials for Na-Ion Batteries	2023	Coatings	10.3390/coatings13030626	Cyclability	Doping	Na0.66Li0.18Fe0.12Mn0.7O2	P2			4.3	1.5	80	Super P	10	PVDF (Kynar 761)	10
118	Structure, Electrochemical, and Transport Properties of Li- and F-Modified P2-Na2/3Ni1/3Mn2/3O2 Cathode Materials for Na-Ion Batteries	2023	Coatings	10.3390/coatings13030626	Cyclability	Doping	Na0.67Mn0.67Ni0.33O2	P2			4.22		80	Super P	10	PVDF (Kynar 761)	10
119	Revisiting the capacity-fading mechanism of P2-type sodium layered oxide cathode materials during high-voltage cycling	2022	Journal of Energy Chemistry	10.1016/j.jechem.2022.01.010	Mechanism	Morphology	Na0.64Ni0.32Mn0.68O2	P2		microns	4.3	2	80	super P	10	polyvinylidene fluoride (PVDF)	10
120	Revisiting the capacity-fading mechanism of P2-type sodium layered oxide cathode materials during high-voltage cycling	2022	Journal of Energy Chemistry	10.1016/j.jechem.2022.01.010	Mechanism	Morphology	Na0.67Ni0.33Mn0.67O2	P2		microns	4.5	2.5	80	super P	10	polyvinylidene fluoride (PVDF)	10
121	Revisiting the capacity-fading mechanism of P2-type sodium layered oxide cathode materials during high-voltage cycling	2022	Journal of Energy Chemistry	10.1016/j.jechem.2022.01.010	Mechanism	Morphology	Na2/3Ni1/3Mn2/3O2	P2		microns	4.3	2	80	super P	10	polyvinylidene fluoride (PVDF)	10
122	Revisiting the capacity-fading mechanism of P2-type sodium layered oxide cathode materials during high-voltage cycling	2022	Journal of Energy Chemistry	10.1016/j.jechem.2022.01.010	Mechanism	Morphology	Na0.67Ni0.33Mn0.67O2(Al-doped)	P2		singlecrystal	4.3	2	80	super P	10	polyvinylidene fluoride (PVDF)	10
123	Revisiting the capacity-fading mechanism of P2-type sodium layered oxide cathode materials during high-voltage cycling	2022	Journal of Energy Chemistry	10.1016/j.jechem.2022.01.010	Mechanism	Morphology	Na0.64Ni0.32Mn0.68O2(Al-doped)	P2			4.3	2	80	super P	10	polyvinylidene fluoride (PVDF)	10
124	The Role of Surface Coating in P’2-Na0.67Mn0.67Ni0.33O2: Enhancing Capacity and Stability of Layered Cathodes for Sodium-ion Batteries	2023	Batteries and Supercaps	10.1002/batt.202300332	Capacity	Coating	Na0.67Mn0.67Ni0.33O2	P2	MgO	singlecrystal	4.1	2.5
125	The Role of Surface Coating in P’2-Na0.67Mn0.67Ni0.33O2: Enhancing Capacity and Stability of Layered Cathodes for Sodium-ion Batteries	2023	Batteries and Supercaps	10.1002/batt.202300332	Capacity	Coating	Na0.67Mn0.67Ni0.33O2withMgOcoating	P2	MgO	singlecrystal	4.1	2.5
126	The Role of Surface Coating in P’2-Na0.67Mn0.67Ni0.33O2: Enhancing Capacity and Stability of Layered Cathodes for Sodium-ion Batteries	2023	Batteries and Supercaps	10.1002/batt.202300332	Capacity	Coating	Na0.67Mn0.67Ni0.33O2with7%MgOcoating	P2	MgO	singlecrystal	4.1	2.5
127	The Role of Surface Coating in P’2-Na0.67Mn0.67Ni0.33O2: Enhancing Capacity and Stability of Layered Cathodes for Sodium-ion Batteries	2023	Batteries and Supercaps	10.1002/batt.202300332	Capacity	Coating	Na0.67Mn0.67Ni0.33O2with5%MgOcoating	P2	amorphous	singlecrystal	4.1	2.5
128	The Role of Surface Coating in P’2-Na0.67Mn0.67Ni0.33O2: Enhancing Capacity and Stability of Layered Cathodes for Sodium-ion Batteries	2023	Batteries and Supercaps	10.1002/batt.202300332	Capacity	Coating	Na0.67Mn0.67Ni0.33O2with0%MgOcoating	P2		singlecrystal	4.1	2.5
129	Niobium-doped layered cathode material for high-power and low-temperature sodium-ion batteries	2022	Nature Communications	10.1038/s41467-022-30942-z	power	Doping	Na2/3Mn2/3Ni1/3O2				4.15	2.4	80	acetylene black	10	polyvinylidene fluoride (PVDF)	10
130	Niobium-doped layered cathode material for high-power and low-temperature sodium-ion batteries	2022	Nature Communications	10.1038/s41467-022-30942-z	power	Doping	Na0.85Li0.12Ni0.22Mn0.66O2				4.2	2	80	acetylene black	10	polyvinylidene fluoride (PVDF)	10
131	Niobium-doped layered cathode material for high-power and low-temperature sodium-ion batteries	2022	Nature Communications	10.1038/s41467-022-30942-z	power	Doping	Na0.78Ni0.31Mn0.67Nb0.02O2	P2		grains	4.15	2.4	80	acetylene black	10	polyvinylidene fluoride (PVDF)	10
132	Niobium-doped layered cathode material for high-power and low-temperature sodium-ion batteries	2022	Nature Communications	10.1038/s41467-022-30942-z	power	Doping	Na0.66Li0.18Fe0.12Mn0.7O2				4.3	1.5	80	acetylene black	10	polyvinylidene fluoride (PVDF)	10
133	Niobium-doped layered cathode material for high-power and low-temperature sodium-ion batteries	2022	Nature Communications	10.1038/s41467-022-30942-z	power	Doping	NaFeO2				4.8	3.2	80	acetylene black	10	polyvinylidene fluoride (PVDF)	10
134	RT-XAMF and TR-XRD studies of solid-state synthesis and thermal stability of NaNiO2 as cathode material for sodium-ion batteries	2022	Ceramics International	10.1016/j.ceramint.2022.03.104	Cyclability	Composition	NaNiO2	monoclinic	Al	circular	3.7
135	RT-XAMF and TR-XRD studies of solid-state synthesis and thermal stability of NaNiO2 as cathode material for sodium-ion batteries	2022	Ceramics International	10.1016/j.ceramint.2022.03.104	Cyclability	Composition	NaCrO2	monoclinic			3.7
136	RT-XAMF and TR-XRD studies of solid-state synthesis and thermal stability of NaNiO2 as cathode material for sodium-ion batteries	2022	Ceramics International	10.1016/j.ceramint.2022.03.104	Cyclability	Composition	NaFeO2	monoclinic			3.7
137	RT-XAMF and TR-XRD studies of solid-state synthesis and thermal stability of NaNiO2 as cathode material for sodium-ion batteries	2022	Ceramics International	10.1016/j.ceramint.2022.03.104	Cyclability	Composition	Na2/3Fe1/3Mn2/3O2				4	2
138	RT-XAMF and TR-XRD studies of solid-state synthesis and thermal stability of NaNiO2 as cathode material for sodium-ion batteries	2022	Ceramics International	10.1016/j.ceramint.2022.03.104	Cyclability	Composition	Na2NiO2	monoclinic			3.7
139	Unravelling the Nature of the Intrinsic Complex Structure of Binary-Phase Na-Layered Oxides	2022	Advanced Materials	10.1002/adma.202202137	Mechanism	Crystal	Na0.76Mn0.5Ni0.3Fe0.1Mg0.1O2				4.2	2	80	Super P, Timcal	10	polyvinylidene fluoride, Aldrich	10
140	Unravelling the Nature of the Intrinsic Complex Structure of Binary-Phase Na-Layered Oxides	2022	Advanced Materials	10.1002/adma.202202137	Mechanism	Crystal	Na0.7Li0.06Mg0.06Ni0.22Mn0.67O2				4.4	2	80	Super P, Timcal	10	polyvinylidene fluoride, Aldrich	10
141	Unravelling the Nature of the Intrinsic Complex Structure of Binary-Phase Na-Layered Oxides	2022	Advanced Materials	10.1002/adma.202202137	Mechanism	Crystal	Na0.76Ni0.20Fe0.40Mn0.40O2	P2/O3			4.2	2	80	Super P, Timcal	10	polyvinylidene fluoride, Aldrich	10
142	Moderate active Fe3+ doping enables improved cationic and anionic redox reactions for wide-voltage-range sodium storage	2024	Carbon Neutrality	10.1007/s43979-023-00077-1	Cyclability	Doping	Na0.67Mg0.1Mn0.9O2	P2		flakes	4.5	1.5	70
143	Moderate active Fe3+ doping enables improved cationic and anionic redox reactions for wide-voltage-range sodium storage	2024	Carbon Neutrality	10.1007/s43979-023-00077-1	Cyclability	Doping	Na0.67Mg0.1Mn0.8Fe0.1O2	P2		flakes	4.5	1.5	70
144	Moderate active Fe3+ doping enables improved cationic and anionic redox reactions for wide-voltage-range sodium storage	2024	Carbon Neutrality	10.1007/s43979-023-00077-1	Cyclability	Doping	Na0.67Mg0.1Mn0.7Fe0.2O2	P2		flakes	4.5	1.5	70
145	Moderate active Fe3+ doping enables improved cationic and anionic redox reactions for wide-voltage-range sodium storage	2024	Carbon Neutrality	10.1007/s43979-023-00077-1	Cyclability	Doping	NaMnO2	P2			4.5	1.5	70
146	Moderate active Fe3+ doping enables improved cationic and anionic redox reactions for wide-voltage-range sodium storage	2024	Carbon Neutrality	10.1007/s43979-023-00077-1	Cyclability	Doping	Na0.67Mn0.67Ni0.33O2	P2			4.5	1.5	70
147	High Performance of Porous, Hierarchically Structured P2-Na0.6Al0.11 − xNi0.22 − yFex+ yMn0.66O2 Cathode Materials	2024	Advanced Energy Materials	10.1002/aenm.202301854	Cyclability	Composition	Na0.6Al0.11Ni0.22Mn0.66O2	P2		spherical	4.6	1.5	80	carbon TIMCAL-C65	10	polyvinylidene fluoride (PVDF)	10
148	High Performance of Porous, Hierarchically Structured P2-Na0.6Al0.11 − xNi0.22 − yFex+ yMn0.66O2 Cathode Materials	2024	Advanced Energy Materials	10.1002/aenm.202301854	Cyclability	Composition	Na0.6Al0.11Ni0.22Mn0.66O2(NANMO)	P2		spherical	4.6	1.5	80	carbon TIMCAL-C65	10	polyvinylidene fluoride (PVDF)	10
149	High Performance of Porous, Hierarchically Structured P2-Na0.6Al0.11 − xNi0.22 − yFex+ yMn0.66O2 Cathode Materials	2024	Advanced Energy Materials	10.1002/aenm.202301854	Cyclability	Composition	Na0.6Al0.11Ni0.22Mn0.66O2(NANMFO)	P2		spherical	4.3	1.5	80	carbon TIMCAL-C65	10	polyvinylidene fluoride (PVDF)	10
150	High Performance of Porous, Hierarchically Structured P2-Na0.6Al0.11 − xNi0.22 − yFex+ yMn0.66O2 Cathode Materials	2024	Advanced Energy Materials	10.1002/aenm.202301854	Cyclability	Composition	Na0.6Al0.11Ni0.22Mn0.66O2(NAFMO)	P2		spherical	4.3	1.5	80	carbon TIMCAL-C65	10	polyvinylidene fluoride (PVDF)	10
151	Expanded K0.37Fe0.04Al0.07Mn0.89O2 Layered Material as a High-Performance Cathode in Sodium-Ion Batteries	2022	Energies	10.3390/en15155659	Capacity	Composition	NaMnO2	monoclinic			3.5	2.1	80	super P	10	polyvinylidene fluoride (PVDF)	10
152	Expanded K0.37Fe0.04Al0.07Mn0.89O2 Layered Material as a High-Performance Cathode in Sodium-Ion Batteries	2022	Energies	10.3390/en15155659	Capacity	Composition	Na0.7Mn0.9Cu0.1O2	layered			3.5	2.1	80	super P	10	polyvinylidene fluoride (PVDF)	10
153	Expanded K0.37Fe0.04Al0.07Mn0.89O2 Layered Material as a High-Performance Cathode in Sodium-Ion Batteries	2022	Energies	10.3390/en15155659	Capacity	Composition	K0.37Fe0.04Al0.07Mn0.89O2	layered		irregular	3.5	2.1	80	super P	10	polyvinylidene fluoride (PVDF)	10
154	Suppressing the Dynamic Oxygen Evolution of Sodium Layered Cathodes through Synergistic Surface Dielectric Polarization and Bulk Site-Selective Co-Doping	2023	Advanced Materials	10.1002/adma.202209556	Cyclability	Coating	Na2/3Ni1/3Mn2/3O2				4.5	1.5
155	Suppressing the Dynamic Oxygen Evolution of Sodium Layered Cathodes through Synergistic Surface Dielectric Polarization and Bulk Site-Selective Co-Doping	2023	Advanced Materials	10.1002/adma.202209556	Cyclability	Coating	LiNi0.5Co0.5O2				4.5	1.5
156	Suppressing the Dynamic Oxygen Evolution of Sodium Layered Cathodes through Synergistic Surface Dielectric Polarization and Bulk Site-Selective Co-Doping	2023	Advanced Materials	10.1002/adma.202209556	Cyclability	Coating	NaNi0.5Mn0.5O2	layered	CaTiO3		4.5	1.5
157	Suppressing the Dynamic Oxygen Evolution of Sodium Layered Cathodes through Synergistic Surface Dielectric Polarization and Bulk Site-Selective Co-Doping	2023	Advanced Materials	10.1002/adma.202209556	Cyclability	Coating	Na2/3Ni1/3Mn2/3O2	P2	CaTiO3	layered	4.5	1.5
158	Studies on sodium-ion batteries: Searching for the proper combination of the cathode material, the electrolyte and the working voltage. The role of magnesium substitution in layered manganese-rich oxides, and pyrrolidinium ionic liquid	2023	Electrochimica Acta	10.1016/j.electacta.2022.141654	Cyclability	Doping	Na0.67Mn0.67Ni0.33O2	hexagonal		hexagonal	4.5	2	75	carbon black Super C65	15	polyvinylidene fluoride (PVDF)	10
159	Studies on sodium-ion batteries: Searching for the proper combination of the cathode material, the electrolyte and the working voltage. The role of magnesium substitution in layered manganese-rich oxides, and pyrrolidinium ionic liquid	2023	Electrochimica Acta	10.1016/j.electacta.2022.141654	Cyclability	Doping	Na0.67Mn0.67Ni0.23Mg0.1O2	hexagonal		plate-like	4.5	2	75	carbon black Super C65	15	polyvinylidene fluoride (PVDF)	10
160	Studies on sodium-ion batteries: Searching for the proper combination of the cathode material, the electrolyte and the working voltage. The role of magnesium substitution in layered manganese-rich oxides, and pyrrolidinium ionic liquid	2023	Electrochimica Acta	10.1016/j.electacta.2022.141654	Cyclability	Doping	Na2/3Ni1/3Mn2/3O2	hexagonal		plate-like	4.5	2	75	carbon black Super C65	15	polyvinylidene fluoride (PVDF)	10
161	Developing an abnormal high-Na-content P2-type layered oxide cathode with near-zero-strain for high-performance sodium-ion batteries	2024	Chemical Science	10.1039/d3sc06878a	Cyclability	Composition	NaNi0.5Co0.5O2				4.3	2
162	Developing an abnormal high-Na-content P2-type layered oxide cathode with near-zero-strain for high-performance sodium-ion batteries	2024	Chemical Science	10.1039/d3sc06878a	Cyclability	Composition	NaNi0.33Mn0.33Co0.33O2	hexagonal		chunk-like	4.3	2
163	Developing an abnormal high-Na-content P2-type layered oxide cathode with near-zero-strain for high-performance sodium-ion batteries	2024	Chemical Science	10.1039/d3sc06878a	Cyclability	Composition	NaNi0.4Mn0.4Co0.2O2	hexagonal		chunk-like	4.3	2
164	Developing an abnormal high-Na-content P2-type layered oxide cathode with near-zero-strain for high-performance sodium-ion batteries	2024	Chemical Science	10.1039/d3sc06878a	Cyclability	Composition	NaNi0.6Mn0.2Co0.2O2	hexagonal		chunk-like	4.3	2
165	Developing an abnormal high-Na-content P2-type layered oxide cathode with near-zero-strain for high-performance sodium-ion batteries	2024	Chemical Science	10.1039/d3sc06878a	Cyclability	Composition	NaNi2/9Mg1/9Co1/3Mn1/3O2	P2		chunk-like	4.3	2
166	Exploration of PVP-Combustion Synthesis and Electrochemical Performance of O3-type NaxNi0.33Fe0.33Mn0.33O2 Layered Material for Sodium-Ion Batteries	2024	Journal of the Electrochemical Society	10.1149/1945-7111/ad1c14	Capacity	Composition	NaNi0.5Mn0.5O2				3.8	2.2	80	acetylene black (AB)	10	polyvinylidene fluoride (PVDF)	10
167	Exploration of PVP-Combustion Synthesis and Electrochemical Performance of O3-type NaxNi0.33Fe0.33Mn0.33O2 Layered Material for Sodium-Ion Batteries	2024	Journal of the Electrochemical Society	10.1149/1945-7111/ad1c14	Capacity	Composition	NaNi0.3Fe0.2Mn0.5O2	R-3m			4	2	80	acetylene black (AB)	10	polyvinylidene fluoride (PVDF)	10
168	Exploration of PVP-Combustion Synthesis and Electrochemical Performance of O3-type NaxNi0.33Fe0.33Mn0.33O2 Layered Material for Sodium-Ion Batteries	2024	Journal of the Electrochemical Society	10.1149/1945-7111/ad1c14	Capacity	Composition	NaNi0.33Fe0.33Mn0.33O2	R-3m			4	2	80	acetylene black (AB)	10	polyvinylidene fluoride (PVDF)	10
169	Exploration of PVP-Combustion Synthesis and Electrochemical Performance of O3-type NaxNi0.33Fe0.33Mn0.33O2 Layered Material for Sodium-Ion Batteries	2024	Journal of the Electrochemical Society	10.1149/1945-7111/ad1c14	Capacity	Composition	NaNi1/3Fe1/3Mn1/3O2	R-3m			4	2	80	acetylene black (AB)	10	polyvinylidene fluoride (PVDF)	10
170	Exploration of PVP-Combustion Synthesis and Electrochemical Performance of O3-type NaxNi0.33Fe0.33Mn0.33O2 Layered Material for Sodium-Ion Batteries	2024	Journal of the Electrochemical Society	10.1149/1945-7111/ad1c14	Capacity	Composition	NaNi0.33Mn0.33Fe0.33O2	R-3m			4	2	80	acetylene black (AB)	10	polyvinylidene fluoride (PVDF)	10
171	Probing the account of phase transition upon electrochemical cycling of the P2-Na0.67Ni0.15Fe0.2Mn0.65O2 layered oxide cathodes for sodium-ion batteries	2024	Materials Research Express	10.1088/2053-1591/ad3464	Mechanism	Crystal	Na0.7Ni0.35Sn0.65O2	hexagonal		plate-like	4.3	1.5	80	Super P	10	polytetrafluoroethylene	10
172	Probing the account of phase transition upon electrochemical cycling of the P2-Na0.67Ni0.15Fe0.2Mn0.65O2 layered oxide cathodes for sodium-ion batteries	2024	Materials Research Express	10.1088/2053-1591/ad3464	Mechanism	Crystal	Na0.67Ni0.17Co0.17Mn0.66O2	hexagonal		plate-like	4.3	1.5	80	Super P	10	polytetrafluoroethylene	10
173	Probing the account of phase transition upon electrochemical cycling of the P2-Na0.67Ni0.15Fe0.2Mn0.65O2 layered oxide cathodes for sodium-ion batteries	2024	Materials Research Express	10.1088/2053-1591/ad3464	Mechanism	Crystal	Na0.7MnO2	hexagonal		plate-like	4.3	1.5	80	Super P	10	polytetrafluoroethylene	10
174	Probing the account of phase transition upon electrochemical cycling of the P2-Na0.67Ni0.15Fe0.2Mn0.65O2 layered oxide cathodes for sodium-ion batteries	2024	Materials Research Express	10.1088/2053-1591/ad3464	Mechanism	Crystal	Na2/3Ni1/3Mn2/3O2	hexagonal		plate-like	4.3	1.5	80	Super P	10	polytetrafluoroethylene	10
175	Probing the account of phase transition upon electrochemical cycling of the P2-Na0.67Ni0.15Fe0.2Mn0.65O2 layered oxide cathodes for sodium-ion batteries	2024	Materials Research Express	10.1088/2053-1591/ad3464	Mechanism	Crystal	Na0.67Ni0.1Mn0.8Fe0.1O2	hexagonal		plate-like	4.3	1.5	80	Super P	10	polytetrafluoroethylene	10
176	P3-Na0.45Ni0.2Mn0.8O2/Na2SeO4 Heterostructure Enabling Long-Life and High-Rate Sodium-Ion Batteries	2023	Advanced Energy Materials	10.1002/aenm.202302393	Cyclability	Coating	P3-Na0.45Ni0.2Mn0.8O2	P3	Na2SeO4		4	1.5
177	P3-Na0.45Ni0.2Mn0.8O2/Na2SeO4 Heterostructure Enabling Long-Life and High-Rate Sodium-Ion Batteries	2023	Advanced Energy Materials	10.1002/aenm.202302393	Cyclability	Coating	/Na2/3Ni1/3Mn1/3Sn1/3O2	hexagonal			3.9	1.5
178	P3-Na0.45Ni0.2Mn0.8O2/Na2SeO4 Heterostructure Enabling Long-Life and High-Rate Sodium-Ion Batteries	2023	Advanced Energy Materials	10.1002/aenm.202302393	Cyclability	Coating	Na0.67Zn0.05Ni0.18Cu0.1Mn0.67O2				3.9	1.5
179	P3-Na0.45Ni0.2Mn0.8O2/Na2SeO4 Heterostructure Enabling Long-Life and High-Rate Sodium-Ion Batteries	2023	Advanced Energy Materials	10.1002/aenm.202302393	Cyclability	Coating	Na0.84Mn0.67Ni0.2Mg0.1□0.03O2	hexagonal			3.9	1.5
180	P3-Na0.45Ni0.2Mn0.8O2/Na2SeO4 Heterostructure Enabling Long-Life and High-Rate Sodium-Ion Batteries	2023	Advanced Energy Materials	10.1002/aenm.202302393	Cyclability	Coating	Na0.75Ca0.04Li0.1Ni0.2Mn0.67O2				4.2	1.5
181	Voltage hysteresis loop as a fingerprint of slow kinetics Co2+-to-Co3+ transition in layered NaxCox/2Ti1−x/2O2 cathodes for sodium batteries	2022	Journal of Materials Chemistry A	10.1039/d2ta07972k	Mechanism	Composition	Na0.67Co0.5Mn0.5O2	trigonal			4.2	0.2	77	Super P carbon	11.5	polyvinylidene fluoride (PVDF)	11.5
182	Voltage hysteresis loop as a fingerprint of slow kinetics Co2+-to-Co3+ transition in layered NaxCox/2Ti1−x/2O2 cathodes for sodium batteries	2022	Journal of Materials Chemistry A	10.1039/d2ta07972k	Mechanism	Composition	Na2/3Co2/3Mn1/3O2	P2			4.2	0.2	77	Super P carbon	11.5	polyvinylidene fluoride (PVDF)	11.5
183	Voltage hysteresis loop as a fingerprint of slow kinetics Co2+-to-Co3+ transition in layered NaxCox/2Ti1−x/2O2 cathodes for sodium batteries	2022	Journal of Materials Chemistry A	10.1039/d2ta07972k	Mechanism	Composition	Na2/3Co0.95Ti0.05O2	trigonal			4.2	0.2	77	Super P carbon	11.5	polyvinylidene fluoride (PVDF)	11.5
184	Voltage hysteresis loop as a fingerprint of slow kinetics Co2+-to-Co3+ transition in layered NaxCox/2Ti1−x/2O2 cathodes for sodium batteries	2022	Journal of Materials Chemistry A	10.1039/d2ta07972k	Mechanism	Composition	Na2/3Co1/2Ti1/2O2	trigonal			4.2	0.2	77	Super P carbon	11.5	polyvinylidene fluoride (PVDF)	11.5
185	Voltage hysteresis loop as a fingerprint of slow kinetics Co2+-to-Co3+ transition in layered NaxCox/2Ti1−x/2O2 cathodes for sodium batteries	2022	Journal of Materials Chemistry A	10.1039/d2ta07972k	Mechanism	Composition	Na0.8Co0.8Ti0.2O2	trigonal			4.2	0.2	77	Super P carbon	11.5	polyvinylidene fluoride (PVDF)	11.5
186	Achieving High Stability and Performance in P2-Type Mn-Based Layered Oxides with Tetravalent Cations for Sodium-Ion Batteries	2022	Small	10.1002/smll.202201086	Cyclability	Doping	Na0.72Mn0.75Li0.24Si0.01O2	P2		plate-like	4.5	2	70	carbon black	20	PVDF	10
187	Achieving High Stability and Performance in P2-Type Mn-Based Layered Oxides with Tetravalent Cations for Sodium-Ion Batteries	2022	Small	10.1002/smll.202201086	Cyclability	Doping	Na0.72Mn0.75Li0.24Ti0.01O2	P2		plate-like	4.5	1.5	70	carbon black	20	PVDF	10
188	Achieving High Stability and Performance in P2-Type Mn-Based Layered Oxides with Tetravalent Cations for Sodium-Ion Batteries	2022	Small	10.1002/smll.202201086	Cyclability	Doping	Na0.67Mn0.67Ni0.33O2	P2		plate-like	4.5	1.5	70	carbon black	20	PVDF	10
189	Achieving High Stability and Performance in P2-Type Mn-Based Layered Oxides with Tetravalent Cations for Sodium-Ion Batteries	2022	Small	10.1002/smll.202201086	Cyclability	Doping	Na0.67Mn0.5Fe0.5O2	P2			4.5	1.5	70	carbon black	20	PVDF	10
190	Achieving High Stability and Performance in P2-Type Mn-Based Layered Oxides with Tetravalent Cations for Sodium-Ion Batteries	2022	Small	10.1002/smll.202201086	Cyclability	Doping	Na0.6Li0.2Mn0.8O2	P2			4.6	2	70	carbon black	20	PVDF	10
191	Modification of Layered Cathodes of Sodium-Ion Batteries with Conducting Polymers	2024	Batteries	10.3390/batteries10030093	Cyclability	Coating	Na2/3Ni1/3Mn2/3O2	hexagonal	PEDOT	layered	4.3	1.5
192	Modification of Layered Cathodes of Sodium-Ion Batteries with Conducting Polymers	2024	Batteries	10.3390/batteries10030093	Cyclability	Coating	Na0.67Ni0.1Fe0.1Mn0.8O2	orthorhombic		layered	4.3	1.5
193	Single-Crystal P2-Na0.67Mn0.67Ni0.33O2 Cathode Material with Improved Cycling Stability for Sodium-Ion Batteries	2024	ACS Applied Materials and Interfaces	10.1021/acsami.3c15348	Cyclability	Morphology	Na0.6(Ti0.2Mn0.2Co0.2Ni0.2Ru0.2)O2				4.2	1.5	80	carbon black	10	PVDF	10
194	Single-Crystal P2-Na0.67Mn0.67Ni0.33O2 Cathode Material with Improved Cycling Stability for Sodium-Ion Batteries	2024	ACS Applied Materials and Interfaces	10.1021/acsami.3c15348	Cyclability	Morphology	Na0.7MnO2	SingleCrystalline		Nanoplates	4.2	1.5	80	carbon black	10	PVDF	10
195	Single-Crystal P2-Na0.67Mn0.67Ni0.33O2 Cathode Material with Improved Cycling Stability for Sodium-Ion Batteries	2024	ACS Applied Materials and Interfaces	10.1021/acsami.3c15348	Cyclability	Morphology	Na0.44Mn0.9Li0.1O2	orthorhombic		monocrystalline	4	2	80	carbon black	10	PVDF	10
196	Single-Crystal P2-Na0.67Mn0.67Ni0.33O2 Cathode Material with Improved Cycling Stability for Sodium-Ion Batteries	2024	ACS Applied Materials and Interfaces	10.1021/acsami.3c15348	Cyclability	Morphology	Na1.1V3O7.9	single-crystalline	holeycarbon	nanobelts	3.8	1.5	80	carbon black	10	PVDF	10
197	Single-Crystal P2-Na0.67Mn0.67Ni0.33O2 Cathode Material with Improved Cycling Stability for Sodium-Ion Batteries	2024	ACS Applied Materials and Interfaces	10.1021/acsami.3c15348	Cyclability	Morphology	Na0.67Mn0.67Ni0.33O2	single-crystalline		flake/plate	4.2	1.5	80	carbon black	10	PVDF	10
198	Ti/Co co-doped O3-Na(Ni0.3Fe0.2Mn0.5)0.85Ti0.1Co0.05O2 with high rate and durable cathode material for sodium-ion batteries	2023	Materials Research Express	10.1088/2053-1591/ad15c3	Cyclability	Doping	NaNi0.5Mn0.5O2	single		plate-like	4.3	2	70	Super-P carbon	20	polyvinylidene fluoride (PVDF)	10
199	Ti/Co co-doped O3-Na(Ni0.3Fe0.2Mn0.5)0.85Ti0.1Co0.05O2 with high rate and durable cathode material for sodium-ion batteries	2023	Materials Research Express	10.1088/2053-1591/ad15c3	Cyclability	Doping	Na0.95Ni0.40Fe0.15Mn0.3Ti0.15O2				4.2	2	70	Super-P carbon	20	polyvinylidene fluoride (PVDF)	10
200	Ti/Co co-doped O3-Na(Ni0.3Fe0.2Mn0.5)0.85Ti0.1Co0.05O2 with high rate and durable cathode material for sodium-ion batteries	2023	Materials Research Express	10.1088/2053-1591/ad15c3	Cyclability	Doping	NaNi1/3Fe1/3Mn1/3O2			plate-like	4.3	2	70	Super-P carbon	20	polyvinylidene fluoride (PVDF)	10
201	Ti/Co co-doped O3-Na(Ni0.3Fe0.2Mn0.5)0.85Ti0.1Co0.05O2 with high rate and durable cathode material for sodium-ion batteries	2023	Materials Research Express	10.1088/2053-1591/ad15c3	Cyclability	Doping	NaNi0.4Mn0.4Cu0.1Ti0.1O2				2	4.2	70	Super-P carbon	20	polyvinylidene fluoride (PVDF)	10
202	Ti/Co co-doped O3-Na(Ni0.3Fe0.2Mn0.5)0.85Ti0.1Co0.05O2 with high rate and durable cathode material for sodium-ion batteries	2023	Materials Research Express	10.1088/2053-1591/ad15c3	Cyclability	Doping	Na(Ni0.3Fe0.2Mn0.5)0.85Ti0.1Co0.05O2	O3			4.3	2	70	Super-P carbon	20	polyvinylidene fluoride (PVDF)	10
203	The effect of configurational entropy on acoustic emission of P2-type layered oxide cathodes for sodium-ion batteries	2023	JPhys Energy	10.1088/2515-7655/acd41a	Mechanism	Composition	Na0.67(Mn0.55Ni0.21Co0.24)O2	P2			4.6	1.5	70	carbon black	20	polyvinylidene difluoride	10
204	The effect of configurational entropy on acoustic emission of P2-type layered oxide cathodes for sodium-ion batteries	2023	JPhys Energy	10.1088/2515-7655/acd41a	Mechanism	Composition	Na0.67(Mn0.45Ni0.18Co0.24Ti0.1Mg0.03)O2	P2			4.6	1.5	70	carbon black	20	polyvinylidene difluoride	10
205	The effect of configurational entropy on acoustic emission of P2-type layered oxide cathodes for sodium-ion batteries	2023	JPhys Energy	10.1088/2515-7655/acd41a	Mechanism	Composition	Na0.67(Mn0.45Ni0.18Co0.18Ti0.1Mg0.03Al0.04Fe0.02)O2	P2			4.6	1.5	70	carbon black	20	polyvinylidene difluoride	10
206	The effect of configurational entropy on acoustic emission of P2-type layered oxide cathodes for sodium-ion batteries	2023	JPhys Energy	10.1088/2515-7655/acd41a	Mechanism	Composition	Na(Ni0.12Cu0.12Mg0.12Fe0.15Co0.15Mn0.1Ti0.1Sn0.1Sb0.04)O2	P2			4.6	1.5	70	carbon black	20	polyvinylidene difluoride	10
207	The effect of configurational entropy on acoustic emission of P2-type layered oxide cathodes for sodium-ion batteries	2023	JPhys Energy	10.1088/2515-7655/acd41a	Mechanism	Composition	Na0.62(Mn0.67Ni0.23Cu0.05Mg0.07Ti0.01)O2	P2		agglomerated	4.6	1.5	70	carbon black	20	polyvinylidene difluoride	10
208	Tuning discharge voltage by Schottky electron barrier in P2-Na2/3Mg0.205Ni0.1Fe0.05Mn0.645O2	2023	Energy Storage Materials	10.1016/j.ensm.2022.12.027	Mechanism	Doping	NaMnO2				4.4	1.5
209	Tuning discharge voltage by Schottky electron barrier in P2-Na2/3Mg0.205Ni0.1Fe0.05Mn0.645O2	2023	Energy Storage Materials	10.1016/j.ensm.2022.12.027	Mechanism	Doping	P3-Na2/3Mg1/3Mn2/3O2	P3			4.3
210	Tuning discharge voltage by Schottky electron barrier in P2-Na2/3Mg0.205Ni0.1Fe0.05Mn0.645O2	2023	Energy Storage Materials	10.1016/j.ensm.2022.12.027	Mechanism	Doping	Na2/3Mg0.28Mn0.72O2	P2			4.3	2.23
211	Titanium Substitution Facilitating Oxygen and Manganese Redox in Sodium Layered Oxide Cathode	2024	Advanced Materials Interfaces	10.1002/admi.202400190	Cyclability	Doping	Na2/3Li2/9Mn53/72Ti1/24O2	P2		hexagonal	4	2	70	SuperP	20	PVDF	10
212	Titanium Substitution Facilitating Oxygen and Manganese Redox in Sodium Layered Oxide Cathode	2024	Advanced Materials Interfaces	10.1002/admi.202400190	Cyclability	Doping	Na2/3Li2/9Mn7/9O2	P2		hexagonal	4	2	70	SuperP	20	PVDF	10
213	Titanium Substitution Facilitating Oxygen and Manganese Redox in Sodium Layered Oxide Cathode	2024	Advanced Materials Interfaces	10.1002/admi.202400190	Cyclability	Doping	Na2/3Ni1/3Mn2/3O2	hexagonal		hexagonal	3.8		70	SuperP	20	PVDF	10
214	Titanium Substitution Facilitating Oxygen and Manganese Redox in Sodium Layered Oxide Cathode	2024	Advanced Materials Interfaces	10.1002/admi.202400190	Cyclability	Doping	Na0.67Mn0.5Fe0.5O2				3.8		70	SuperP	20	PVDF	10
215	Titanium Substitution Facilitating Oxygen and Manganese Redox in Sodium Layered Oxide Cathode	2024	Advanced Materials Interfaces	10.1002/admi.202400190	Cyclability	Doping	Na0.67Ni0.33Mn0.67O2	hexagonal		hexagonal	3.8		70	SuperP	20	PVDF	10
216	Lowering Sodium-Storage Lattice Strains of Layered Oxide Cathodes by Pushing Charge Transfer on Anions	2023	Energy and Environmental Materials	10.1002/eem2.12671	Cyclability	Doping	NaNi0.5Mn0.5O2	R3-m			4.1	2	70	conductive carbon	20	polyvinylidene fluoride (PVDF)	10
217	Lowering Sodium-Storage Lattice Strains of Layered Oxide Cathodes by Pushing Charge Transfer on Anions	2023	Energy and Environmental Materials	10.1002/eem2.12671	Cyclability	Doping	NaFe0.5Mn0.5O2	R3-m			4.1	2	70	conductive carbon	20	polyvinylidene fluoride (PVDF)	10
218	Lowering Sodium-Storage Lattice Strains of Layered Oxide Cathodes by Pushing Charge Transfer on Anions	2023	Energy and Environmental Materials	10.1002/eem2.12671	Cyclability	Doping	NaCo0.5Mn0.5O2	R3-m			4.1	2	70	conductive carbon	20	polyvinylidene fluoride (PVDF)	10
219	Lowering Sodium-Storage Lattice Strains of Layered Oxide Cathodes by Pushing Charge Transfer on Anions	2023	Energy and Environmental Materials	10.1002/eem2.12671	Cyclability	Doping	NaNi0.5Co0.5O2	R3-m			4.1	2	70	conductive carbon	20	polyvinylidene fluoride (PVDF)	10
220	Lowering Sodium-Storage Lattice Strains of Layered Oxide Cathodes by Pushing Charge Transfer on Anions	2023	Energy and Environmental Materials	10.1002/eem2.12671	Cyclability	Doping	NaCr0.5Mn0.5O2	R3-m			4.1	2	70	conductive carbon	20	polyvinylidene fluoride (PVDF)	10
221	Layered P2-NaxMn3/4Ni1/4O2 Cathode Materials For Sodium-Ion Batteries: Synthesis, Electrochemistry and Influence of Ambient Storage	2022	Frontiers in Energy Research	10.3389/fenrg.2022.910842	Mechanism	Composition	Na2/3Ni1/3Mn2/3O2	P2			4.3	1.5	84	SuperP-Li	8	PVDF	8
222	Layered P2-NaxMn3/4Ni1/4O2 Cathode Materials For Sodium-Ion Batteries: Synthesis, Electrochemistry and Influence of Ambient Storage	2022	Frontiers in Energy Research	10.3389/fenrg.2022.910842	Mechanism	Composition	Na2/3Mn3/4Ni1/4O2	P2			4.3	1.5	84	SuperP-Li	8	PVDF	8
223	Stabilized O3-Type Layered Sodium Oxides with Enhanced Rate Performance and Cycling Stability by Dual-Site Ti4+/K+ Substitution	2023	Advanced Science	10.1002/advs.202304067	Cyclability	Doping	NaNi0.5Mn0.5O2			plate-like	3.7	2.49	80	SuperP	10	polyvinylidene fluoride (PVDF)	10
224	Stabilized O3-Type Layered Sodium Oxides with Enhanced Rate Performance and Cycling Stability by Dual-Site Ti4+/K+ Substitution	2023	Advanced Science	10.1002/advs.202304067	Cyclability	Doping	NaNi0.45Cu0.05Mn0.4Ti0.1O2				3.7	2.49	80	SuperP	10	polyvinylidene fluoride (PVDF)	10
225	Stabilized O3-Type Layered Sodium Oxides with Enhanced Rate Performance and Cycling Stability by Dual-Site Ti4+/K+ Substitution	2023	Advanced Science	10.1002/advs.202304067	Cyclability	Doping	NaNi0.35Fe0.2Mg0.05Mn0.4O2				3.7	2.49	80	SuperP	10	polyvinylidene fluoride (PVDF)	10
226	Stabilized O3-Type Layered Sodium Oxides with Enhanced Rate Performance and Cycling Stability by Dual-Site Ti4+/K+ Substitution	2023	Advanced Science	10.1002/advs.202304067	Cyclability	Doping	NaNi0.4Mn0.25Ti0.3Co0.05O2				3.7	2.49	80	SuperP	10	polyvinylidene fluoride (PVDF)	10
227	Stabilized O3-Type Layered Sodium Oxides with Enhanced Rate Performance and Cycling Stability by Dual-Site Ti4+/K+ Substitution	2023	Advanced Science	10.1002/advs.202304067	Cyclability	Doping	Na0.99K0.01Ni0.5Mn0.4Ti0.1O2	hexagonal			4	2	80	SuperP	10	polyvinylidene fluoride (PVDF)	10
228	Mechanism of gelation in high nickel content cathode slurries for sodium-ion batteries	2022	Journal of Colloid and Interface Science	10.1016/j.jcis.2022.07.033	Mechanism	Composition	NaNi1/2Mn1/4Sn1/8Ti1/8O2		carbon	agglomerates	4	1.5	89	carbon black	6	PVDF	5
229	Mechanism of gelation in high nickel content cathode slurries for sodium-ion batteries	2022	Journal of Colloid and Interface Science	10.1016/j.jcis.2022.07.033	Mechanism	Composition	Na0.44MnO2			nanorods	4	2	89	carbon black	6	PVDF	5
230	Mechanism of gelation in high nickel content cathode slurries for sodium-ion batteries	2022	Journal of Colloid and Interface Science	10.1016/j.jcis.2022.07.033	Mechanism	Composition	NaNi1/3Mn1/3Co1/3O2		carbon		4	2	89	carbon black	6	PVDF	5
231	Regulating Cation Interactions for Zero-Strain and High-Voltage P2-type Na2/3Li1/6Co1/6Mn2/3O2 Layered Oxide Cathodes of Sodium-Ion Batteries	2023	Angewandte Chemie - International Edition	10.1002/anie.202304628	Cyclability	Doping	Na2/3Li1/6Co1/6Mn2/3O2	P2		prismatic	4.5	2	70
232	Regulating Cation Interactions for Zero-Strain and High-Voltage P2-type Na2/3Li1/6Co1/6Mn2/3O2 Layered Oxide Cathodes of Sodium-Ion Batteries	2023	Angewandte Chemie - International Edition	10.1002/anie.202304628	Cyclability	Doping	Na2/3Li1/3Mn2/3O2				4.5	2	70
233	Regulating Cation Interactions for Zero-Strain and High-Voltage P2-type Na2/3Li1/6Co1/6Mn2/3O2 Layered Oxide Cathodes of Sodium-Ion Batteries	2023	Angewandte Chemie - International Edition	10.1002/anie.202304628	Cyclability	Doping	Na2/3Co1/3Mn2/3O2	P2			4.5	2	70
234	Regulating Cation Interactions for Zero-Strain and High-Voltage P2-type Na2/3Li1/6Co1/6Mn2/3O2 Layered Oxide Cathodes of Sodium-Ion Batteries	2023	Angewandte Chemie - International Edition	10.1002/anie.202304628	Cyclability	Doping	Na2/3Li1/3Co1/3Mn1/3O2	P2			4.5	2	70
235	Cobalt-free copper-substituted Na(Ti,Mn,Ni,Cu)O2 layered oxide cathode materials for Na-ion batteries	2022	Journal of Solid State Chemistry	10.1016/j.jssc.2022.123461	Capacity	Doping	Na0.67Ti0.67Ni0.23Cu0.1O2	P63/mmc			4.2	2
236	Cobalt-free copper-substituted Na(Ti,Mn,Ni,Cu)O2 layered oxide cathode materials for Na-ion batteries	2022	Journal of Solid State Chemistry	10.1016/j.jssc.2022.123461	Capacity	Doping	Na0.67Ti0.33Mn0.33Ni0.23Cu0.1O2	hexagonal			4.2	2
237	Cobalt-free copper-substituted Na(Ti,Mn,Ni,Cu)O2 layered oxide cathode materials for Na-ion batteries	2022	Journal of Solid State Chemistry	10.1016/j.jssc.2022.123461	Capacity	Doping	Na0.67Ni0.33Mn0.67O2	hexagonal			4.2	2
238	Molybdenum-Incorporated O3-type Sodium Layered Oxide Cathodes for High-Performance Sodium-Ion Batteries	2023	Energy Technology	10.1002/ente.202300437	Capacity	Doping	NaNi0.5Mn0.5O2	O3		irregular	4	1.5	80	acetylene black	10	polyvinylidene fluoride (PVDF)	10
239	Molybdenum-Incorporated O3-type Sodium Layered Oxide Cathodes for High-Performance Sodium-Ion Batteries	2023	Energy Technology	10.1002/ente.202300437	Capacity	Doping	Na2/3Ni1/3Mn2/3O2				4	1.5	80	acetylene black	10	polyvinylidene fluoride (PVDF)	10
240	Molybdenum-Incorporated O3-type Sodium Layered Oxide Cathodes for High-Performance Sodium-Ion Batteries	2023	Energy Technology	10.1002/ente.202300437	Capacity	Doping	Na2/3Fe1/3Mn1/2O2	P2			4	1.5	80	acetylene black	10	polyvinylidene fluoride (PVDF)	10
241	Molybdenum-Incorporated O3-type Sodium Layered Oxide Cathodes for High-Performance Sodium-Ion Batteries	2023	Energy Technology	10.1002/ente.202300437	Capacity	Doping	NaCoO2	O3		irregular	4.5	1.5	80	acetylene black	10	polyvinylidene fluoride (PVDF)	10
242	Molybdenum-Incorporated O3-type Sodium Layered Oxide Cathodes for High-Performance Sodium-Ion Batteries	2023	Energy Technology	10.1002/ente.202300437	Capacity	Doping	NaMnO2	O3		irregular	4	1.5	80	acetylene black	10	polyvinylidene fluoride (PVDF)	10
243	Layered Oxide Material as a Highly Stable Na-ion Source and Sink for Investigation of Sodium-ion Battery Materials	2024	ChemElectroChem	10.1002/celc.202300529	Cyclability	Composition	Na0.6Ni0.22Al0.11Mn0.66O2	hexagonal			3	0.5	85	SuperC65	10	polyvinylidene difluoride (PVdF)	5
244	Layered Oxide Material as a Highly Stable Na-ion Source and Sink for Investigation of Sodium-ion Battery Materials	2024	ChemElectroChem	10.1002/celc.202300529	Cyclability	Composition	Na2Ti3O7				3	0.5	85	SuperC65	10	polyvinylidene difluoride (PVdF)	5
245	Layered Oxide Material as a Highly Stable Na-ion Source and Sink for Investigation of Sodium-ion Battery Materials	2024	ChemElectroChem	10.1002/celc.202300529	Cyclability	Composition	Na0.66Li0.22Ti0.78O2	hexagonal			3	0.5	85	SuperC65	10	polyvinylidene difluoride (PVdF)	5
246	Layered Oxide Material as a Highly Stable Na-ion Source and Sink for Investigation of Sodium-ion Battery Materials	2024	ChemElectroChem	10.1002/celc.202300529	Cyclability	Composition	Na2/3Co1/3Ti2/3O2	hexagonal			3	0.5	85	SuperC65	10	polyvinylidene difluoride (PVdF)	5
247	Layered Oxide Material as a Highly Stable Na-ion Source and Sink for Investigation of Sodium-ion Battery Materials	2024	ChemElectroChem	10.1002/celc.202300529	Cyclability	Composition	Na0.6Cr0.6Ti0.4O2	hexagonal			3	0.5	85	SuperC65	10	polyvinylidene difluoride (PVdF)	5
248	Metal Substitution versus Oxygen-Storage Modifier to Regulate the Oxygen Redox Reactions in Sodium-Deficient Three-Layered Oxides	2022	Batteries	10.3390/batteries8060056	Cyclability	Composition	Na2/3Ni1/3Mn2/3O2	P3	CeO2	layered	4.3	2	80	carbon black (Super C65)	10	polyvinylidene fluoride (PVDF)	10
249	Metal Substitution versus Oxygen-Storage Modifier to Regulate the Oxygen Redox Reactions in Sodium-Deficient Three-Layered Oxides	2022	Batteries	10.3390/batteries8060056	Cyclability	Composition	P3-Na2/3Ni1/3Mg1/6Mn1/2O2	layered			4.5	1.5	80	carbon black (Super C65)	10	polyvinylidene fluoride (PVDF)	10
250	Metal Substitution versus Oxygen-Storage Modifier to Regulate the Oxygen Redox Reactions in Sodium-Deficient Three-Layered Oxides	2022	Batteries	10.3390/batteries8060056	Cyclability	Composition	NaMn0.33Fe0.33Ni0.33O2	layered	CeO2	aggregates	4.3	2	80	carbon black (Super C65)	10	polyvinylidene fluoride (PVDF)	10
251	Metal Substitution versus Oxygen-Storage Modifier to Regulate the Oxygen Redox Reactions in Sodium-Deficient Three-Layered Oxides	2022	Batteries	10.3390/batteries8060056	Cyclability	Composition	Na0.65Mn0.75Ni0.25O2		metalphosphates		4.3	2	80	carbon black (Super C65)	10	polyvinylidene fluoride (PVDF)	10
252	Metal Substitution versus Oxygen-Storage Modifier to Regulate the Oxygen Redox Reactions in Sodium-Deficient Three-Layered Oxides	2022	Batteries	10.3390/batteries8060056	Cyclability	Composition	NaNi0.5Mn0.5O2	layered	CeO2	aggregates	4.3	2	80	carbon black (Super C65)	10	polyvinylidene fluoride (PVDF)	10
253	Layered Oxide Cathodes for Sodium-Ion Batteries: Storage Mechanism, Electrochemistry, and Techno-economics	2023	Accounts of Chemical Research	10.1021/acs.accounts.2c00690	Mechanism	Composition	Na0.9Cu0.22Fe0.30Mn0.48O2	O3			4	1.5
254	Layered Oxide Cathodes for Sodium-Ion Batteries: Storage Mechanism, Electrochemistry, and Techno-economics	2023	Accounts of Chemical Research	10.1021/acs.accounts.2c00690	Mechanism	Composition	NaFe0.40Ni0.30Mn0.30O2	O3			4	1.5
255	Layered Oxide Cathodes for Sodium-Ion Batteries: Storage Mechanism, Electrochemistry, and Techno-economics	2023	Accounts of Chemical Research	10.1021/acs.accounts.2c00690	Mechanism	Composition	Na0.67MnO2	P2			4	2
256	Layered Oxide Cathodes for Sodium-Ion Batteries: Storage Mechanism, Electrochemistry, and Techno-economics	2023	Accounts of Chemical Research	10.1021/acs.accounts.2c00690	Mechanism	Composition	NaNi0.35Mn0.55O2	O3			4	2
257	Suppressing the P2-O2 phase transition and Na+/vacancy ordering in Na0.67Ni0.33Mn0.67O2 by a delicate multicomponent modulation strategy	2023	Battery Energy	10.1002/bte2.20230022	Cyclability	Doping	Na2/3Ni1/3Mn2/3O2	hexagonal			4.2	2	70	carbon black	20	PVDF	10
258	Suppressing the P2-O2 phase transition and Na+/vacancy ordering in Na0.67Ni0.33Mn0.67O2 by a delicate multicomponent modulation strategy	2023	Battery Energy	10.1002/bte2.20230022	Cyclability	Doping	Na0.67Ni0.33Mn0.67O2	P2			4.2	2.5	70	carbon black	20	PVDF	10
259	Suppressing the P2-O2 phase transition and Na+/vacancy ordering in Na0.67Ni0.33Mn0.67O2 by a delicate multicomponent modulation strategy	2023	Battery Energy	10.1002/bte2.20230022	Cyclability	Doping	Na0.72Ni0.28Li0.05Mn0.57Ti0.10O2	P2			4.35	2.5	70	carbon black	20	PVDF	10
260	Hollow Na0.62K0.05Mn0.7Ni0.2Co0.1O2 polyhedra with exposed stable {001} facets and K riveting for sodium-ion batteries; [钠离子电池Na0.62K0.05Mn0.7Ni0.2Co0.1O2正极材料: 钾 离子掺杂且{001}面稳定的中空多面体]	2023	Science China Materials	10.1007/s40843-022-2157-8	Cyclability	Doping	Na2/3Ni1/3Mn2/3O2			polyhedra	4.3	1.8	80	carbon black	10	polyvinylidene fluoride	10
261	Hollow Na0.62K0.05Mn0.7Ni0.2Co0.1O2 polyhedra with exposed stable {001} facets and K riveting for sodium-ion batteries; [钠离子电池Na0.62K0.05Mn0.7Ni0.2Co0.1O2正极材料: 钾 离子掺杂且{001}面稳定的中空多面体]	2023	Science China Materials	10.1007/s40843-022-2157-8	Cyclability	Doping	Na0.78Ni0.23Mn0.69O2				4.3	1.8	80	carbon black	10	polyvinylidene fluoride	10
262	Hollow Na0.62K0.05Mn0.7Ni0.2Co0.1O2 polyhedra with exposed stable {001} facets and K riveting for sodium-ion batteries; [钠离子电池Na0.62K0.05Mn0.7Ni0.2Co0.1O2正极材料: 钾 离子掺杂且{001}面稳定的中空多面体]	2023	Science China Materials	10.1007/s40843-022-2157-8	Cyclability	Doping	NaNi1/3Mn1/3Co1/3O2			polyhedra	4.3	1.8	80	carbon black	10	polyvinylidene fluoride	10
263	Hollow Na0.62K0.05Mn0.7Ni0.2Co0.1O2 polyhedra with exposed stable {001} facets and K riveting for sodium-ion batteries; [钠离子电池Na0.62K0.05Mn0.7Ni0.2Co0.1O2正极材料: 钾 离子掺杂且{001}面稳定的中空多面体]	2023	Science China Materials	10.1007/s40843-022-2157-8	Cyclability	Doping	Na0.62K0.05Mn0.7Ni0.2Co0.1O2	hexagonal		polyhedra	4.3	1.8	80	carbon black	10	polyvinylidene fluoride	10
264	Controlling Iron Versus Oxygen Redox in the Layered Cathode Na0.67Fe0.5Mn0.5O2: Mitigating Voltage and Capacity Fade by Mg Substitution	2022	Advanced Energy Materials	10.1002/aenm.202200702	Cyclability	Doping	Na0.67Fe0.5Mn0.5O2						80	acetylene carbon black	10	polytetrafluoroethylene (PTFE)	10
265	Controlling Iron Versus Oxygen Redox in the Layered Cathode Na0.67Fe0.5Mn0.5O2: Mitigating Voltage and Capacity Fade by Mg Substitution	2022	Advanced Energy Materials	10.1002/aenm.202200702	Cyclability	Doping	Na0.67Mn0.72Mg0.28O2				4.5	2	80	acetylene carbon black	10	polytetrafluoroethylene (PTFE)	10
266	Controlling Iron Versus Oxygen Redox in the Layered Cathode Na0.67Fe0.5Mn0.5O2: Mitigating Voltage and Capacity Fade by Mg Substitution	2022	Advanced Energy Materials	10.1002/aenm.202200702	Cyclability	Doping	Na0.67Fe0.25Mn0.6Mg0.15O2	P63/mcm					80	acetylene carbon black	10	polytetrafluoroethylene (PTFE)	10
267	Controlling Iron Versus Oxygen Redox in the Layered Cathode Na0.67Fe0.5Mn0.5O2: Mitigating Voltage and Capacity Fade by Mg Substitution	2022	Advanced Energy Materials	10.1002/aenm.202200702	Cyclability	Doping	Na0.67Fe0.5Mn0.5O2						80	acetylene carbon black	10	polytetrafluoroethylene (PTFE)	10
268	Boosting electrochemical reaction and suppressing phase transition with a high-entropy O3-type layered oxide for sodium-ion batteries	2022	Journal of Materials Chemistry A	10.1039/d2ta02451a	Cyclability	Composition	NaFeO2				4.1	2	80	acetylene black	10	polyvinylidene fluoride (PVDF)	10
269	Boosting electrochemical reaction and suppressing phase transition with a high-entropy O3-type layered oxide for sodium-ion batteries	2022	Journal of Materials Chemistry A	10.1039/d2ta02451a	Cyclability	Composition	Na0.67MnO2				4.1	2	80	acetylene black	10	polyvinylidene fluoride (PVDF)	10
270	Boosting electrochemical reaction and suppressing phase transition with a high-entropy O3-type layered oxide for sodium-ion batteries	2022	Journal of Materials Chemistry A	10.1039/d2ta02451a	Cyclability	Composition	Na7/9Cu2/9Fe1/9Mn2/3O2				4.1	2	80	acetylene black	10	polyvinylidene fluoride (PVDF)	10
271	Boosting electrochemical reaction and suppressing phase transition with a high-entropy O3-type layered oxide for sodium-ion batteries	2022	Journal of Materials Chemistry A	10.1039/d2ta02451a	Cyclability	Composition	NaNiO2				4.1	2	80	acetylene black	10	polyvinylidene fluoride (PVDF)	10
272	Boosting electrochemical reaction and suppressing phase transition with a high-entropy O3-type layered oxide for sodium-ion batteries	2022	Journal of Materials Chemistry A	10.1039/d2ta02451a	Cyclability	Composition	Na(Fe0.2Co0.2Ni0.2Ti0.2Sn0.1Li0.1)O2	hexagonal		irregularparticles	4.1	2	80	acetylene black	10	polyvinylidene fluoride (PVDF)	10
273	Rational design of intergrowth P2/O3 biphasic layered structure with reversible anionic redox chemistry and structural evolution for Na-ions batteries	2023	Science Bulletin	10.1016/j.scib.2023.01.010	Cyclability	Composition	NaNi0.60Fe0.25Mn0.15O2	P2/O3		rod-like	4.3	2	70	acetylene black	20	PVDF	10
274	Rational design of intergrowth P2/O3 biphasic layered structure with reversible anionic redox chemistry and structural evolution for Na-ions batteries	2023	Science Bulletin	10.1016/j.scib.2023.01.010	Cyclability	Composition	Na2/3Ni1/3Mn2/3O2	P2/O3			4.3	2	70	acetylene black	20	PVDF	10
275	Rational design of intergrowth P2/O3 biphasic layered structure with reversible anionic redox chemistry and structural evolution for Na-ions batteries	2023	Science Bulletin	10.1016/j.scib.2023.01.010	Cyclability	Composition	Na0.67Mn0.67Ni0.33O2	P2/O3			4.3	2	70	acetylene black	20	PVDF	10
276	Rational design of intergrowth P2/O3 biphasic layered structure with reversible anionic redox chemistry and structural evolution for Na-ions batteries	2023	Science Bulletin	10.1016/j.scib.2023.01.010	Cyclability	Composition	Na0.67Ni0.33Mn0.67O2	P2			4.3	2	70	acetylene black	20	PVDF	10
277	Biphase-to-monophase structure evolution of Na0.766+xLixNi0.33−xMn0.5Fe0.1Ti0.07O2 toward ultradurable Na-ion batteries	2024	Carbon Energy	10.1002/cey2.565	Cyclability	Doping	Na0.826Li0.06Ni0.27Mn0.5Fe0.1Ti0.07O2	O3			4.3	2.2	80	super P	10	polyvinylidene fluoride	10
278	Biphase-to-monophase structure evolution of Na0.766+xLixNi0.33−xMn0.5Fe0.1Ti0.07O2 toward ultradurable Na-ion batteries	2024	Carbon Energy	10.1002/cey2.565	Cyclability	Doping	NaNi0.5Mn0.5O2	O3			4.12		80	super P	10	polyvinylidene fluoride	10
279	Optimizing Electrochemical Performance in Sodium-Ion Batteries using O3-type Na0.90Cu0.22Fe0.30Mn0.48O2 and Hard Carbon	2023	Journal of the Electrochemical Society	10.1149/1945-7111/ace5e5	Cyclability	Composition	Na0.90Cu0.22Fe0.30Mn0.48O2	O3		block	4	2		conductive graphite, acetylene black, Carbon Black (CB), Acetylene Black (AB), Ketjen Black (KB)	10	polyvinylidene fluoride (PVDF), sodium carboxymethylcellulose (CMC), sodium alginate (SA)
280	Optimizing Electrochemical Performance in Sodium-Ion Batteries using O3-type Na0.90Cu0.22Fe0.30Mn0.48O2 and Hard Carbon	2023	Journal of the Electrochemical Society	10.1149/1945-7111/ace5e5	Cyclability	Composition	Na0.67Ni0.33Mn0.67O2	O3		block	4	1		conductive graphite, acetylene black, Carbon Black (CB), Acetylene Black (AB), Ketjen Black (KB)	10	polyvinylidene fluoride (PVDF), sodium carboxymethylcellulose (CMC), sodium alginate (SA)
281	Optimizing Electrochemical Performance in Sodium-Ion Batteries using O3-type Na0.90Cu0.22Fe0.30Mn0.48O2 and Hard Carbon	2023	Journal of the Electrochemical Society	10.1149/1945-7111/ace5e5	Cyclability	Composition	Na0.67Mn0.5Fe0.5O2	O3		irregularblock	4	1		conductive graphite, acetylene black, Carbon Black (CB), Acetylene Black (AB), Ketjen Black (KB)	10	polyvinylidene fluoride (PVDF), sodium carboxymethylcellulose (CMC), sodium alginate (SA)
282	Optimizing Electrochemical Performance in Sodium-Ion Batteries using O3-type Na0.90Cu0.22Fe0.30Mn0.48O2 and Hard Carbon	2023	Journal of the Electrochemical Society	10.1149/1945-7111/ace5e5	Cyclability	Composition	Na0.67Co0.5Mn0.5O2	O3		irregularblock	4	1		conductive graphite, acetylene black, Carbon Black (CB), Acetylene Black (AB), Ketjen Black (KB)	10	polyvinylidene fluoride (PVDF), sodium carboxymethylcellulose (CMC), sodium alginate (SA)
283	Optimizing Electrochemical Performance in Sodium-Ion Batteries using O3-type Na0.90Cu0.22Fe0.30Mn0.48O2 and Hard Carbon	2023	Journal of the Electrochemical Society	10.1149/1945-7111/ace5e5	Cyclability	Composition	Na0.67Ni0.33Fe0.33Mn0.33O2	O3		block	4	2		conductive graphite, acetylene black, Carbon Black (CB), Acetylene Black (AB), Ketjen Black (KB)	10	polyvinylidene fluoride (PVDF), sodium carboxymethylcellulose (CMC), sodium alginate (SA)
284	Influence of the Current Density on the Interfacial Reactivity of Layered Oxide Cathodes for Sodium-Ion Batteries	2022	Energy Technology	10.1002/ente.202200071	Mechanism	Composition	Na0.67Mn0.8Ti0.2O2	P2			3.8	2.1	80	carbon Super C65	10	polyvinylidene fluoride (PVdF)	10
285	Influence of the Current Density on the Interfacial Reactivity of Layered Oxide Cathodes for Sodium-Ion Batteries	2022	Energy Technology	10.1002/ente.202200071	Mechanism	Composition	Na2CO3				3.8	2.1	80	carbon Super C65	10	polyvinylidene fluoride (PVdF)	10
286	Influence of the Current Density on the Interfacial Reactivity of Layered Oxide Cathodes for Sodium-Ion Batteries	2022	Energy Technology	10.1002/ente.202200071	Mechanism	Composition	Mn2O3				3.8	2.1	80	carbon Super C65	10	polyvinylidene fluoride (PVdF)	10
287	Influence of the Current Density on the Interfacial Reactivity of Layered Oxide Cathodes for Sodium-Ion Batteries	2022	Energy Technology	10.1002/ente.202200071	Mechanism	Composition	TiO2	anatase			3.8	2.1	80	carbon Super C65	10	polyvinylidene fluoride (PVdF)	10
288	Influence of the Current Density on the Interfacial Reactivity of Layered Oxide Cathodes for Sodium-Ion Batteries	2022	Energy Technology	10.1002/ente.202200071	Mechanism	Composition	Na0.67Mn0.8TiO2	P2			3.8	2.1	80	carbon Super C65	10	polyvinylidene fluoride (PVdF)	10
289	Cationic ordering transition in oxygen-redox layered oxide cathodes	2024	Carbon Energy	10.1002/cey2.389	Mechanism	Composition	NaMnO2	P3		ribbon	4.5	1.5
290	Cationic ordering transition in oxygen-redox layered oxide cathodes	2024	Carbon Energy	10.1002/cey2.389	Mechanism	Composition	Na3Ni2SbO6	O3			4.2	2
291	Cationic ordering transition in oxygen-redox layered oxide cathodes	2024	Carbon Energy	10.1002/cey2.389	Mechanism	Composition	Na0.5Ni0.25Mn0.75O2	P3		ribbon	4.5	1.5
292	Cationic ordering transition in oxygen-redox layered oxide cathodes	2024	Carbon Energy	10.1002/cey2.389	Mechanism	Composition	Na4/7□1/7Mn6/7O2	P3		ribbon	4.1	1.5
293	Cationic ordering transition in oxygen-redox layered oxide cathodes	2024	Carbon Energy	10.1002/cey2.389	Mechanism	Composition	Na0.67Mn0.5Fe0.5O2	P3		ribbon	4.5	1.5
294	Investigating the effect of synthesis selection on O3-sodium layered oxide structural changes and electrochemical properties	2023	Frontiers in Chemistry	10.3389/fchem.2023.1151656	Cyclability	Synthesis	NaNi1/3Fe1/3Mn1/3O2	R-3m		prismatic	3.1	2.7	80	carbon C65	10	poly(vinylidene fluoride) (PVdF; SOLEF)	10
295	Investigating the effect of synthesis selection on O3-sodium layered oxide structural changes and electrochemical properties	2023	Frontiers in Chemistry	10.3389/fchem.2023.1151656	Cyclability	Synthesis	NaNi0.5Mn0.5O2	R-3m		prismatic	3.1	2.7	80	carbon C65	10	poly(vinylidene fluoride) (PVdF; SOLEF)	10
296	Investigating the effect of synthesis selection on O3-sodium layered oxide structural changes and electrochemical properties	2023	Frontiers in Chemistry	10.3389/fchem.2023.1151656	Cyclability	Synthesis	NaFe0.5Mn0.5O2	R-3m			3.8	1.5	80	carbon C65	10	poly(vinylidene fluoride) (PVdF; SOLEF)	10
297	Investigating the effect of synthesis selection on O3-sodium layered oxide structural changes and electrochemical properties	2023	Frontiers in Chemistry	10.3389/fchem.2023.1151656	Cyclability	Synthesis	NaNi0.6Mn0.2Co0.2O2	R-3m		prismatic	3.1	2.7	80	carbon C65	10	poly(vinylidene fluoride) (PVdF; SOLEF)	10
298	Investigating the effect of synthesis selection on O3-sodium layered oxide structural changes and electrochemical properties	2023	Frontiers in Chemistry	10.3389/fchem.2023.1151656	Cyclability	Synthesis	NaNi0.5Co0.5O2	R-3m		prismatic	3.8	1.5	80	carbon C65	10	poly(vinylidene fluoride) (PVdF; SOLEF)	10
299	Origin of Aging of a P2-NaxMn3/4Ni1/4O2 Cathode Active Material for Sodium-Ion Batteries	2023	Chemistry of Materials	10.1021/acs.chemmater.3c01499	Cyclability	Morphology	Na2/3Ni1/3Mn2/3O2	P2			3.8	2	84	Graphite & Carbon	8	polyvinylidene difluoride	8
300	Origin of Aging of a P2-NaxMn3/4Ni1/4O2 Cathode Active Material for Sodium-Ion Batteries	2023	Chemistry of Materials	10.1021/acs.chemmater.3c01499	Cyclability	Morphology	Na1/3Ni1/3Mn2/3O2				3.8	2	84	Graphite & Carbon	8	polyvinylidene difluoride	8
301	Origin of Aging of a P2-NaxMn3/4Ni1/4O2 Cathode Active Material for Sodium-Ion Batteries	2023	Chemistry of Materials	10.1021/acs.chemmater.3c01499	Cyclability	Morphology	O2-Na0Ni1/3Mn2/3O2				3.8	2	84	Graphite & Carbon	8	polyvinylidene difluoride	8
302	Origin of Aging of a P2-NaxMn3/4Ni1/4O2 Cathode Active Material for Sodium-Ion Batteries	2023	Chemistry of Materials	10.1021/acs.chemmater.3c01499	Cyclability	Morphology	LiNi0.5Co0.5O2				4.3	1.5	84	Graphite & Carbon	8	polyvinylidene difluoride	8
303	Strong Anionic Repulsion for Fast Na Kinetics in P2-Type Layered Oxides	2023	Advanced Science	10.1002/advs.202206367	power	Doping	Na2/3Mn6/9Ni3/9O2		Alfoil		4.4	2.5	80	super P	10	polyvinylidene fluoride (PVDF)	10
304	Strong Anionic Repulsion for Fast Na Kinetics in P2-Type Layered Oxides	2023	Advanced Science	10.1002/advs.202206367	power	Doping	Na2/3Ti1/9Mn5/9Ni3/9O2				4.4	4.1	80	super P	10	polyvinylidene fluoride (PVDF)	10
305	Strong Anionic Repulsion for Fast Na Kinetics in P2-Type Layered Oxides	2023	Advanced Science	10.1002/advs.202206367	power	Doping	NaLi1/3Mn2/3O2				4.4	2.5	80	super P	10	polyvinylidene fluoride (PVDF)	10
306	Solvation-enhanced electrolyte on layered oxide cathode tailoring even and stable CEI for durable sodium storage	2023	Carbon Neutrality	10.1007/s43979-023-00060-w	Cyclability	Composition	NaNi1/3Fe1/3Mn1/3O2	O3		spherical	3.9	2
307	Solvation-enhanced electrolyte on layered oxide cathode tailoring even and stable CEI for durable sodium storage	2023	Carbon Neutrality	10.1007/s43979-023-00060-w	Cyclability	Composition	NaNi0.5Co0.5O2	O3		spherical	3.9	2
308	Solvation-enhanced electrolyte on layered oxide cathode tailoring even and stable CEI for durable sodium storage	2023	Carbon Neutrality	10.1007/s43979-023-00060-w	Cyclability	Composition	NaFe0.5Mn0.5O2	O3		spherical	3.9	2
309	Solvation-enhanced electrolyte on layered oxide cathode tailoring even and stable CEI for durable sodium storage	2023	Carbon Neutrality	10.1007/s43979-023-00060-w	Cyclability	Composition	NaCrO2	O3		spherical	3.9	2
310	Solvation-enhanced electrolyte on layered oxide cathode tailoring even and stable CEI for durable sodium storage	2023	Carbon Neutrality	10.1007/s43979-023-00060-w	Cyclability	Composition	NaTiO2	O3		spherical	3.9	2
311	Structural and Electrochemical Properties of Layered P2-Na0.8 Co0.8 Ti0.2 O2 Cathode in Sodium-Ion Batteries	2022	Energies	10.3390/en15093371	Cyclability	Composition	Na2/3Co1/2Ti1/2O2	P2					80	Super P carbon	10	PTFE	10
312	Structural and Electrochemical Properties of Layered P2-Na0.8 Co0.8 Ti0.2 O2 Cathode in Sodium-Ion Batteries	2022	Energies	10.3390/en15093371	Cyclability	Composition	Na0.67Co0.95Ti0.05O2						80	Super P carbon	10	PTFE	10
313	Structural and Electrochemical Properties of Layered P2-Na0.8 Co0.8 Ti0.2 O2 Cathode in Sodium-Ion Batteries	2022	Energies	10.3390/en15093371	Cyclability	Composition	NaFe0.5Co0.5O2						80	Super P carbon	10	PTFE	10
314	Structural and Electrochemical Properties of Layered P2-Na0.8 Co0.8 Ti0.2 O2 Cathode in Sodium-Ion Batteries	2022	Energies	10.3390/en15093371	Cyclability	Composition	NaNi0.3Co0.3Fe0.3O2						80	Super P carbon	10	PTFE	10
315	Structural and Electrochemical Properties of Layered P2-Na0.8 Co0.8 Ti0.2 O2 Cathode in Sodium-Ion Batteries	2022	Energies	10.3390/en15093371	Cyclability	Composition	NaCo0.5Mn0.5O2	P2					80	Super P carbon	10	PTFE	10
316	Electrospun Interconnected Bead-Like P2-NaxCoyMn1−yO2 (x = 0.66, y = 0.1) Cathode Material for Stable Sodium-Ion Storage	2022	Batteries	10.3390/batteries8110237	Cyclability	Morphology	Na0.53MnO2			nanorods	2.75	2.25	80	Super P	10	PVDF	10
317	Electrospun Interconnected Bead-Like P2-NaxCoyMn1−yO2 (x = 0.66, y = 0.1) Cathode Material for Stable Sodium-Ion Storage	2022	Batteries	10.3390/batteries8110237	Cyclability	Morphology	Na0.66Co0.1Mn0.9O2	P63/mmc	carbon	flake-like	3.9	2.25	80	Super P	10	PVDF	10
318	Electrospun Interconnected Bead-Like P2-NaxCoyMn1−yO2 (x = 0.66, y = 0.1) Cathode Material for Stable Sodium-Ion Storage	2022	Batteries	10.3390/batteries8110237	Cyclability	Morphology	Na2/3(Fe1/2Mn1/2)O2	P2		nanofibers	3.9	2.25	80	Super P	10	PVDF	10
319	Entropy and crystal-facet modulation of P2-type layered cathodes for long-lasting sodium-based batteries	2022	Nature Communications	10.1038/s41467-022-30113-0	Cyclability	Composition	Na0.66(Mn0.54Co0.13Ni0.13)O2	P2	metaloxide		4.3	2	70	acetylene black	20	polyvinylidene fluoride (PVDF)	10
320	Entropy and crystal-facet modulation of P2-type layered cathodes for long-lasting sodium-based batteries	2022	Nature Communications	10.1038/s41467-022-30113-0	Cyclability	Composition	Na0.92Li0.40Ni0.73Mn0.24Co0.12O2				4.3	2	70	acetylene black	20	polyvinylidene fluoride (PVDF)	10
321	Entropy and crystal-facet modulation of P2-type layered cathodes for long-lasting sodium-based batteries	2022	Nature Communications	10.1038/s41467-022-30113-0	Cyclability	Composition	Na7/9Cu2/9Fe1/9Mn2/3O2	hexagonal		microparticles	4.3	2	70	acetylene black	20	polyvinylidene fluoride (PVDF)	10
322	High-Voltage Stabilization of O3-Type Layered Oxide for Sodium-Ion Batteries by Simultaneous Tin Dual Modification	2022	Chemistry of Materials	10.1021/acs.chemmater.2c00522	Cyclability	Doping	NaNi0.5Mn0.5O2				4.1	1.5	90	C45, Timcal	5	PVDF, Solvay	5
323	High-Voltage Stabilization of O3-Type Layered Oxide for Sodium-Ion Batteries by Simultaneous Tin Dual Modification	2022	Chemistry of Materials	10.1021/acs.chemmater.2c00522	Cyclability	Doping	NaMn0.48Ni0.2Fe0.3Mg0.02O2	O3	SnO2	spherical	4.1	1.5	90	C45, Timcal	5	PVDF, Solvay	5
324	High-Voltage Stabilization of O3-Type Layered Oxide for Sodium-Ion Batteries by Simultaneous Tin Dual Modification	2022	Chemistry of Materials	10.1021/acs.chemmater.2c00522	Cyclability	Doping	Na0.67Ni0.33Mn0.67O2	O3			4.1	2	90	C45, Timcal	5	PVDF, Solvay	5
325	High-Voltage Stabilization of O3-Type Layered Oxide for Sodium-Ion Batteries by Simultaneous Tin Dual Modification	2022	Chemistry of Materials	10.1021/acs.chemmater.2c00522	Cyclability	Doping	NaNi1/3Fe1/3Mn1/3O2	O3			4.1	2	90	C45, Timcal	5	PVDF, Solvay	5
326	Synthesis and thermodynamics of transition metal oxide based sodium ion cathode materials	2019	Journal of Solid State Chemistry	10.1016/j.jssc.2019.121011	Mechanism	Composition	NaMnO2	orthorhombic		layered	3.8	1.5
327	Synthesis and thermodynamics of transition metal oxide based sodium ion cathode materials	2019	Journal of Solid State Chemistry	10.1016/j.jssc.2019.121011	Mechanism	Composition	NaFeO2	orthorhombic
328	Synthesis and thermodynamics of transition metal oxide based sodium ion cathode materials	2019	Journal of Solid State Chemistry	10.1016/j.jssc.2019.121011	Mechanism	Composition	NaCoO2	P2			4	2
329	Synthesis and thermodynamics of transition metal oxide based sodium ion cathode materials	2019	Journal of Solid State Chemistry	10.1016/j.jssc.2019.121011	Mechanism	Composition	NaNiO2	monoclinic			4	2
330	Synthesis and thermodynamics of transition metal oxide based sodium ion cathode materials	2019	Journal of Solid State Chemistry	10.1016/j.jssc.2019.121011	Mechanism	Composition	Na0.7MO2	monoclinic			4	2
331	Electrodeposition of atmosphere-sensitive ternary sodium transition metal oxide films for sodium-based electrochemical energy storage	2021	Proceedings of the National Academy of Sciences of the United States of America	10.1073/pnas.2025044118	Capacity	Composition	Na0.98CoO2	O3		platelet	3.8	2	100
332	Electrodeposition of atmosphere-sensitive ternary sodium transition metal oxide films for sodium-based electrochemical energy storage	2021	Proceedings of the National Academy of Sciences of the United States of America	10.1073/pnas.2025044118	Capacity	Composition	NaFeO2	rhombohedral			3.8	2	100
333	Electrodeposition of atmosphere-sensitive ternary sodium transition metal oxide films for sodium-based electrochemical energy storage	2021	Proceedings of the National Academy of Sciences of the United States of America	10.1073/pnas.2025044118	Capacity	Composition	NaCrO2				3.8	2	100
334	Manipulating Stable Layered P2-Type Cathode via a Co-Substitution Strategy for High Performance Sodium Ion Batteries	2022	Small Methods	10.1002/smtd.202101292	Cyclability	Doping	Na0.70Li0.06Zn0.06Ni0.21Mn0.67O2	P2		spherical	4.4	2	70	acetylene black	20	polyvinylidene fluoride (PVDF)	10
335	Manipulating Stable Layered P2-Type Cathode via a Co-Substitution Strategy for High Performance Sodium Ion Batteries	2022	Small Methods	10.1002/smtd.202101292	Cyclability	Doping	Na0.7Ni0.33Mn0.67O2	P2		spherical	4.4	2	70	acetylene black	20	polyvinylidene fluoride (PVDF)	10
336	Manipulating Stable Layered P2-Type Cathode via a Co-Substitution Strategy for High Performance Sodium Ion Batteries	2022	Small Methods	10.1002/smtd.202101292	Cyclability	Doping	Na0.7Li0.06Zn0.06Ni0.21Mn0.67O2(NaLiZNMO-180)	P2		spherical	4.4	2	70	acetylene black	20	polyvinylidene fluoride (PVDF)	10
337	Manipulating Stable Layered P2-Type Cathode via a Co-Substitution Strategy for High Performance Sodium Ion Batteries	2022	Small Methods	10.1002/smtd.202101292	Cyclability	Doping	Na0.7Ni0.33Mn0.67O2(NaNMO)	P2		spherical	4.4	2	70	acetylene black	20	polyvinylidene fluoride (PVDF)	10
338	High-energy-resolution XANES of layered oxides for sodium-ion battery	2019	Applied Physics Express	10.7567/1882-0786/ab10cd	Mechanism	Composition	Na0.91CoO2	trigonal
339	High-energy-resolution XANES of layered oxides for sodium-ion battery	2019	Applied Physics Express	10.7567/1882-0786/ab10cd	Mechanism	Composition	Na0.66CoO2	hexagonal
340	High-energy-resolution XANES of layered oxides for sodium-ion battery	2019	Applied Physics Express	10.7567/1882-0786/ab10cd	Mechanism	Composition	Na1.00MnO2	monoclinic
341	High-energy-resolution XANES of layered oxides for sodium-ion battery	2019	Applied Physics Express	10.7567/1882-0786/ab10cd	Mechanism	Composition	Na0.54MnO2	hexagonal
342	High-energy-resolution XANES of layered oxides for sodium-ion battery	2019	Applied Physics Express	10.7567/1882-0786/ab10cd	Mechanism	Composition	Na0.54MnO2	hexagonal
343	A durable P2-type layered oxide cathode with superior low-temperature performance for sodium-ion batteries; [耐久的P2型层状氧化物正极材料的低温储钠性能研 究]	2022	Science China Materials	10.1007/s40843-021-1742-8	Cyclability	Composition	Na0.67Ni0.1Co0.1Mn0.8O2	hexagonal		microflake	4.2	1.5	80	super P carbon black	10	polyvinylidene fluoride	10
344	A durable P2-type layered oxide cathode with superior low-temperature performance for sodium-ion batteries; [耐久的P2型层状氧化物正极材料的低温储钠性能研 究]	2022	Science China Materials	10.1007/s40843-021-1742-8	Cyclability	Composition	Na0.67Co0.2Mn0.8O2	hexagonal		microflake	4.2	1.5	80	super P carbon black	10	polyvinylidene fluoride	10
345	A durable P2-type layered oxide cathode with superior low-temperature performance for sodium-ion batteries; [耐久的P2型层状氧化物正极材料的低温储钠性能研 究]	2022	Science China Materials	10.1007/s40843-021-1742-8	Cyclability	Composition	Na0.67Ni0.2Mn0.8O2	hexagonal		microflake	4.2	1.5	80	super P carbon black	10	polyvinylidene fluoride	10
346	A durable P2-type layered oxide cathode with superior low-temperature performance for sodium-ion batteries; [耐久的P2型层状氧化物正极材料的低温储钠性能研 究]	2022	Science China Materials	10.1007/s40843-021-1742-8	Cyclability	Composition	Na5/8MnO2	hexagonal		microflake	4.2	1.5	80	super P carbon black	10	polyvinylidene fluoride	10
347	A First-Principles and Experimental Investigation of Nickel Solubility into the P2 NaxCoO2 Sodium-Ion Cathode	2018	Advanced Energy Materials	10.1002/aenm.201801446	Capacity	Composition	Na0.75Ni0.22Co0.78O2	P2			4.6	1.5	80	Csp	20	PFTE
348	A First-Principles and Experimental Investigation of Nickel Solubility into the P2 NaxCoO2 Sodium-Ion Cathode	2018	Advanced Energy Materials	10.1002/aenm.201801446	Capacity	Composition	NaNi0.5Mn0.5O2	P2			4.3	1.5	80	Csp	20	PFTE
349	A First-Principles and Experimental Investigation of Nickel Solubility into the P2 NaxCoO2 Sodium-Ion Cathode	2018	Advanced Energy Materials	10.1002/aenm.201801446	Capacity	Composition	NaNi0.5Co0.5O2	layered	kapton		4.6	1.5	80	Csp	20	PFTE
350	A First-Principles and Experimental Investigation of Nickel Solubility into the P2 NaxCoO2 Sodium-Ion Cathode	2018	Advanced Energy Materials	10.1002/aenm.201801446	Capacity	Composition	NaNi1/3Mn1/3Co1/3O2	P2			4.6	1.5	80	Csp	20	PFTE
351	A First-Principles and Experimental Investigation of Nickel Solubility into the P2 NaxCoO2 Sodium-Ion Cathode	2018	Advanced Energy Materials	10.1002/aenm.201801446	Capacity	Composition	NaMn1/4Fe1/4Co1/4Ni1/4O2	P2			4.3	1.5	80	Csp	20	PFTE
352	Elucidation of Anionic and Cationic Redox Reactions in a Prototype Sodium-Layered Oxide Cathode	2019	ACS Applied Materials and Interfaces	10.1021/acsami.9b13013	Mechanism	Composition	Na2/3Ni1/3Mn2/3O2	P63/mmc		nanoflakes	4.5	2
353	Elucidation of Anionic and Cationic Redox Reactions in a Prototype Sodium-Layered Oxide Cathode	2019	ACS Applied Materials and Interfaces	10.1021/acsami.9b13013	Mechanism	Composition	Na0.78Ni0.23Mn0.69O2	P63/mmc		irregularparticles	4.5	2
354	Elucidation of Anionic and Cationic Redox Reactions in a Prototype Sodium-Layered Oxide Cathode	2019	ACS Applied Materials and Interfaces	10.1021/acsami.9b13013	Mechanism	Composition	Na2/3Ni1/3Mn7/12Fe1/12O2	hexagonal		irregular	4.5	2
355	Elucidation of Anionic and Cationic Redox Reactions in a Prototype Sodium-Layered Oxide Cathode	2019	ACS Applied Materials and Interfaces	10.1021/acsami.9b13013	Mechanism	Composition	Na0.67Mn0.67Ni0.33O2	P63/mmc		irregularparticles	4.5	2
356	Elucidation of Anionic and Cationic Redox Reactions in a Prototype Sodium-Layered Oxide Cathode	2019	ACS Applied Materials and Interfaces	10.1021/acsami.9b13013	Mechanism	Composition	Na2/3Ni1/3Mn2/3O2	P63/mmc		flakes	4.5	2
357	Optimize solid-state synthesis of P2-Na0.67Ni0.33Mn0.67O2 cathode materials by using the orthogonal experimental design method	2021	International Journal of Energy Research	10.1002/er.6843	Capacity	Composition	Na0.67Ni0.33Mn0.67O2	P63/mmc			4.3	2
358	Optimize solid-state synthesis of P2-Na0.67Ni0.33Mn0.67O2 cathode materials by using the orthogonal experimental design method	2021	International Journal of Energy Research	10.1002/er.6843	Capacity	Composition	Na0.67Fe0.5Mn0.5O2	P2			4.3	2
359	Operando Studies on the NaNi0.5Ti0.5O2 Cathode for Na-Ion Batteries: Elucidating Titanium as a Structure Stabilizer	2019	ACS Applied Materials and Interfaces	10.1021/acsami.9b10352	Mechanism	Composition	NaNiO2	monoclinic			4.5	2	85	Super P carbon	10	PTFE	5
360	Operando Studies on the NaNi0.5Ti0.5O2 Cathode for Na-Ion Batteries: Elucidating Titanium as a Structure Stabilizer	2019	ACS Applied Materials and Interfaces	10.1021/acsami.9b10352	Mechanism	Composition	NaNi0.5Ti0.5O2	O3			4.2	1.5	85	Super P carbon	10	PTFE	5
361	Operando Studies on the NaNi0.5Ti0.5O2 Cathode for Na-Ion Batteries: Elucidating Titanium as a Structure Stabilizer	2019	ACS Applied Materials and Interfaces	10.1021/acsami.9b10352	Mechanism	Composition	NaNi0.5Mn0.5O2				3	1.5	85	Super P carbon	10	PTFE	5
362	Operando Studies on the NaNi0.5Ti0.5O2 Cathode for Na-Ion Batteries: Elucidating Titanium as a Structure Stabilizer	2019	ACS Applied Materials and Interfaces	10.1021/acsami.9b10352	Mechanism	Composition	Na0.8Ni0.4Ti0.6O2				3	1.5	85	Super P carbon	10	PTFE	5
363	Both cationic and anionic redox chemistry in a P2-type sodium layered oxide	2020	Nano Energy	10.1016/j.nanoen.2020.104474	Mechanism	Composition	Na2IrO3	hexagonal			4.5	2	70	carbon black	20	poly (vinyl difluoride) (PVDF)	10
364	Both cationic and anionic redox chemistry in a P2-type sodium layered oxide	2020	Nano Energy	10.1016/j.nanoen.2020.104474	Mechanism	Composition	Na0.78Ni0.23Mn0.69O2	hexagonal		plate-like	4.5	2	70	carbon black	20	poly (vinyl difluoride) (PVDF)	10
365	Both cationic and anionic redox chemistry in a P2-type sodium layered oxide	2020	Nano Energy	10.1016/j.nanoen.2020.104474	Mechanism	Composition	Na2/3Mn0.72Cu0.22Mg0.06O2	hexagonal		plate-like	4.5	2	70	carbon black	20	poly (vinyl difluoride) (PVDF)	10
366	Both cationic and anionic redox chemistry in a P2-type sodium layered oxide	2020	Nano Energy	10.1016/j.nanoen.2020.104474	Mechanism	Composition	Na2/3MnO2	P2			4.5	2	70	carbon black	20	poly (vinyl difluoride) (PVDF)	10
367	Stabilizing Transition Metal Vacancy Induced Oxygen Redox by Co2+/Co3+ Redox and Sodium-Site Doping for Layered Cathode Materials	2021	Angewandte Chemie - International Edition	10.1002/anie.202108933	Cyclability	Composition	Na0.8Mg0.13Mn0.6Co0.2Mg0.07&0.13O2	P2		particles	4.4	1.6
368	Stabilizing Transition Metal Vacancy Induced Oxygen Redox by Co2+/Co3+ Redox and Sodium-Site Doping for Layered Cathode Materials	2021	Angewandte Chemie - International Edition	10.1002/anie.202108933	Cyclability	Composition	Na0.6Li0.2Mn0.8O2				4.4	1.6
369	Stabilizing Transition Metal Vacancy Induced Oxygen Redox by Co2+/Co3+ Redox and Sodium-Site Doping for Layered Cathode Materials	2021	Angewandte Chemie - International Edition	10.1002/anie.202108933	Cyclability	Composition	Na0.72Li0.24Mn0.76O2				4.4	1.6
370	Stabilizing Transition Metal Vacancy Induced Oxygen Redox by Co2+/Co3+ Redox and Sodium-Site Doping for Layered Cathode Materials	2021	Angewandte Chemie - International Edition	10.1002/anie.202108933	Cyclability	Composition	LiCoO2				4.4
371	A general strategy for batch development of high-performance and cost-effective sodium layered cathodes	2021	Nano Energy	10.1016/j.nanoen.2021.106371	Cyclability	Doping	Na0.85Mn0.6Ni0.4O2	O3			4.4	1.5
372	A general strategy for batch development of high-performance and cost-effective sodium layered cathodes	2021	Nano Energy	10.1016/j.nanoen.2021.106371	Cyclability	Doping	NaNi0.5Mn0.5O2	O3			4.4	1.5
373	A general strategy for batch development of high-performance and cost-effective sodium layered cathodes	2021	Nano Energy	10.1016/j.nanoen.2021.106371	Cyclability	Doping	NaCrO2				4	2
374	Nature of the "z"-phase in layered Na-ion battery cathodes	2019	Energy and Environmental Science	10.1039/c8ee02991a	Mechanism	Composition	Na2/3Ni1/3Mn2/3O2	P2			4.1	1.5	75	Carbon black (Super S, Timcal)	15	PVDF (Kynar)	10
375	Nature of the "z"-phase in layered Na-ion battery cathodes	2019	Energy and Environmental Science	10.1039/c8ee02991a	Mechanism	Composition	Na2/3Fe1/2Mn1/2O2	P2			4.1	1.5	75	Carbon black (Super S, Timcal)	15	PVDF (Kynar)	10
376	Nature of the "z"-phase in layered Na-ion battery cathodes	2019	Energy and Environmental Science	10.1039/c8ee02991a	Mechanism	Composition	Na2/3Ni1/6Mn1/2Fe1/3O2	P2			4.1	1.5	75	Carbon black (Super S, Timcal)	15	PVDF (Kynar)	10
377	Nature of the "z"-phase in layered Na-ion battery cathodes	2019	Energy and Environmental Science	10.1039/c8ee02991a	Mechanism	Composition	NaMO2(where M=Mn, Fe, Co, Ni)	P2			4.1	1.5	75	Carbon black (Super S, Timcal)	15	PVDF (Kynar)	10
378	Nature of the "z"-phase in layered Na-ion battery cathodes	2019	Energy and Environmental Science	10.1039/c8ee02991a	Mechanism	Composition	Na2/3Ni1/3Mn2/3O2	P2			4.1	1.5	75	Carbon black (Super S, Timcal)	15	PVDF (Kynar)	10
379	A highly-stable layered Fe/Mn-based cathode with ultralow strain for advanced sodium-ion batteries	2021	Nano Energy	10.1016/j.nanoen.2021.106206	Cyclability	Doping	Na2/3Mn1/2Fe1/2O2	P2			4.3	1.5	80	acetylene black	10	poly(vinylidene fluoride) (PVDF)	10
380	A highly-stable layered Fe/Mn-based cathode with ultralow strain for advanced sodium-ion batteries	2021	Nano Energy	10.1016/j.nanoen.2021.106206	Cyclability	Doping	Na0.67Mn0.5Fe0.5O2	P2			4.2	1.5	80	acetylene black	10	poly(vinylidene fluoride) (PVDF)	10
381	A highly-stable layered Fe/Mn-based cathode with ultralow strain for advanced sodium-ion batteries	2021	Nano Energy	10.1016/j.nanoen.2021.106206	Cyclability	Doping	Na2/3Fe0.4Mn0.6O2	P2			4.2	2.5	80	acetylene black	10	poly(vinylidene fluoride) (PVDF)	10
382	A highly-stable layered Fe/Mn-based cathode with ultralow strain for advanced sodium-ion batteries	2021	Nano Energy	10.1016/j.nanoen.2021.106206	Cyclability	Doping	typeNa0.65Li0.08Cu0.08Fe0.24Mn0.6O2	P2			4.2	2.5	80	acetylene black	10	poly(vinylidene fluoride) (PVDF)	10
383	Vacancy-Enabled O3 Phase Stabilization for Manganese-Rich Layered Sodium Cathodes	2021	Angewandte Chemie - International Edition	10.1002/anie.202016334	Cyclability	Composition	LiNi0.6Mn0.2Co0.2O2	layered			4.6	2	67	Co	16	Ni	17
384	Vacancy-Enabled O3 Phase Stabilization for Manganese-Rich Layered Sodium Cathodes	2021	Angewandte Chemie - International Edition	10.1002/anie.202016334	Cyclability	Composition	Li2MnO3				4.6		67	Co	16	Ni	17
385	Vacancy-Enabled O3 Phase Stabilization for Manganese-Rich Layered Sodium Cathodes	2021	Angewandte Chemie - International Edition	10.1002/anie.202016334	Cyclability	Composition	NaTiO2	O3			3.8	2	67	Co	16	Ni	17
386	Vacancy-Enabled O3 Phase Stabilization for Manganese-Rich Layered Sodium Cathodes	2021	Angewandte Chemie - International Edition	10.1002/anie.202016334	Cyclability	Composition	NaMnO2	O3			3.8	2	67	Co	16	Ni	17
387	Vacancy-Enabled O3 Phase Stabilization for Manganese-Rich Layered Sodium Cathodes	2021	Angewandte Chemie - International Edition	10.1002/anie.202016334	Cyclability	Composition	LiNi1/3Co1/3Mn1/3O2				4.6	2	67	Co	16	Ni	17
388	MgO-Coated Layered Cathode Oxide With Enhanced Stability for Sodium-Ion Batteries	2022	Frontiers in Energy Research	10.3389/fenrg.2022.847818	Cyclability	Coating	Na2/3Ni1/3Mn2/3O2	P2	MgO	hexagonalsheets	4.5	2	80	carbon black	10	polyvinylidene fluoride (PVDF)	10
389	MgO-Coated Layered Cathode Oxide With Enhanced Stability for Sodium-Ion Batteries	2022	Frontiers in Energy Research	10.3389/fenrg.2022.847818	Cyclability	Coating	Na0.67Ni0.33Mn0.67O2	P2	MgO	hexagonalsheets	4.2		80	carbon black	10	polyvinylidene fluoride (PVDF)	10
390	MgO-Coated Layered Cathode Oxide With Enhanced Stability for Sodium-Ion Batteries	2022	Frontiers in Energy Research	10.3389/fenrg.2022.847818	Cyclability	Coating	Na0.65Ni0.17Co0.11Mn0.72O2	P2	MgO	hexagonalsheets	4.5	2	80	carbon black	10	polyvinylidene fluoride (PVDF)	10
391	MgO-Coated Layered Cathode Oxide With Enhanced Stability for Sodium-Ion Batteries	2022	Frontiers in Energy Research	10.3389/fenrg.2022.847818	Cyclability	Coating	Na0.67Mn0.65Co0.2Ni0.15O2	P2	MgO	hexagonalsheets	4.5	2	80	carbon black	10	polyvinylidene fluoride (PVDF)	10
392	Anionic Redox and Electrochemical Kinetics of the Na2Mn3O7Cathode Material for Sodium-Ion Batteries	2022	Energy and Fuels	10.1021/acs.energyfuels.2c00148	Mechanism	Composition	Na2Mn3O7	triclinic		agglomerated	4.5	1.5
393	Synthesis and characterization of Ru doped NaNi 0.5 Mn 0.3 Ti 0.2 O 2 cathode material with improved electrochemical performance for sodium-ion batteries	2019	Ionics	10.1007/s11581-018-2830-x	Capacity	Doping	Na0.66Fe1/3Cr1/3Ti1/3O2				4.1	1.5	80	acetylene black	10	polyvinylidene fluoride (PVDF)	10
394	Synthesis and characterization of Ru doped NaNi 0.5 Mn 0.3 Ti 0.2 O 2 cathode material with improved electrochemical performance for sodium-ion batteries	2019	Ionics	10.1007/s11581-018-2830-x	Capacity	Doping	Na1.2Ni0.2Mn0.2Ru0.4O2	hexagonal		hexagonal	4.5	1.5	80	acetylene black	10	polyvinylidene fluoride (PVDF)	10
395	Synthesis and characterization of Ru doped NaNi 0.5 Mn 0.3 Ti 0.2 O 2 cathode material with improved electrochemical performance for sodium-ion batteries	2019	Ionics	10.1007/s11581-018-2830-x	Capacity	Doping	Na2RuO3	hexagonal		layered	4.5	1.5	80	acetylene black	10	polyvinylidene fluoride (PVDF)	10
396	Synthesis and characterization of Ru doped NaNi 0.5 Mn 0.3 Ti 0.2 O 2 cathode material with improved electrochemical performance for sodium-ion batteries	2019	Ionics	10.1007/s11581-018-2830-x	Capacity	Doping	Na2Ru0.95Zr0.05O3	O3		hexagonal	4.5	1.5	80	acetylene black	10	polyvinylidene fluoride (PVDF)	10
397	Synthesis and characterization of Ru doped NaNi 0.5 Mn 0.3 Ti 0.2 O 2 cathode material with improved electrochemical performance for sodium-ion batteries	2019	Ionics	10.1007/s11581-018-2830-x	Capacity	Doping	Na3RuO4	hexagonal			4.5	1.5	80	acetylene black	10	polyvinylidene fluoride (PVDF)	10
398	Novel P2-type layered medium-entropy ceramics oxide as cathode material for sodium-ion batteries	2022	Journal of Advanced Ceramics	10.1007/s40145-021-0524-8	Cyclability	Composition	Na0.78Ni0.23Mn0.69O2	layered		rock-like	4.2	2	80	acetylene black	10	polyvinylidene fluoride (PVDF)	10
399	Novel P2-type layered medium-entropy ceramics oxide as cathode material for sodium-ion batteries	2022	Journal of Advanced Ceramics	10.1007/s40145-021-0524-8	Cyclability	Composition	Na2/3Mg0.28Mn0.72O2	layered			4.2	2	80	acetylene black	10	polyvinylidene fluoride (PVDF)	10
400	Novel P2-type layered medium-entropy ceramics oxide as cathode material for sodium-ion batteries	2022	Journal of Advanced Ceramics	10.1007/s40145-021-0524-8	Cyclability	Composition	Na0.67Mn0.67Ni0.33O2	P2		cube	4.2	2	80	acetylene black	10	polyvinylidene fluoride (PVDF)	10
401	Novel P2-type layered medium-entropy ceramics oxide as cathode material for sodium-ion batteries	2022	Journal of Advanced Ceramics	10.1007/s40145-021-0524-8	Cyclability	Composition	Na0.67Mn0.65Ni0.2Co0.15O2	layered		cube	4.2	2	80	acetylene black	10	polyvinylidene fluoride (PVDF)	10
402	High-capacity P2-type NaxLi0.25Mn0.75O2 cathode enabled by anionic oxygen redox	2019	Journal of the Electrochemical Society	10.1149/2.0611916jes	Capacity	Composition	Na0.75Li0.25Mn0.75O2	P2		hexagonal-plate	4.4	1.5	80	acetylene black	10	polyvinylidene fluoride (PVDF)	10
403	High-capacity P2-type NaxLi0.25Mn0.75O2 cathode enabled by anionic oxygen redox	2019	Journal of the Electrochemical Society	10.1149/2.0611916jes	Capacity	Composition	Na0.67Ni0.33Mn0.67O2	P2		hexagonal-plate	4.4	1.5	80	acetylene black	10	polyvinylidene fluoride (PVDF)	10
404	High-capacity P2-type NaxLi0.25Mn0.75O2 cathode enabled by anionic oxygen redox	2019	Journal of the Electrochemical Society	10.1149/2.0611916jes	Capacity	Composition	Na0.67Mn0.67Co0.33O2	P2		hexagonal-plate	4.4	1.5	80	acetylene black	10	polyvinylidene fluoride (PVDF)	10
405	High-capacity P2-type NaxLi0.25Mn0.75O2 cathode enabled by anionic oxygen redox	2019	Journal of the Electrochemical Society	10.1149/2.0611916jes	Capacity	Composition	Na0.67Ni0.33Mn0.33Co0.33O2	P2		hexagonal-plate	4.4	1.5	80	acetylene black	10	polyvinylidene fluoride (PVDF)	10
406	High-capacity P2-type NaxLi0.25Mn0.75O2 cathode enabled by anionic oxygen redox	2019	Journal of the Electrochemical Society	10.1149/2.0611916jes	Capacity	Composition	Na0.67Fe0.5Mn0.5O2	P2		hexagonal-plate	4.4	1.5	80	acetylene black	10	polyvinylidene fluoride (PVDF)	10
407	Thermophysical characterization of a layered p2 type structure na0.53 mno2 cathode material for sodium ion batteries	2021	Batteries	10.3390/batteries7010016	Mechanism	Composition	Na0.53MnO2	P2		powder	4	2
408	Thermophysical characterization of a layered p2 type structure na0.53 mno2 cathode material for sodium ion batteries	2021	Batteries	10.3390/batteries7010016	Mechanism	Composition	Na0.7MnO2				4	2
409	Thermophysical characterization of a layered p2 type structure na0.53 mno2 cathode material for sodium ion batteries	2021	Batteries	10.3390/batteries7010016	Mechanism	Composition	Na0.58FeO2				4	1.5
410	Large-scale synthesis of the stable co-free layered oxide cathode by the synergetic contribution of multielement chemical substitution for practical sodium-ion battery	2020	Research	10.34133/2020/1469301	Air stability	Composition	NaNi0.5Mn0.5O2				3.9	1.9	70	Super P carbon	20	polyvinylidene fluoride (PVDF)	10
411	Large-scale synthesis of the stable co-free layered oxide cathode by the synergetic contribution of multielement chemical substitution for practical sodium-ion battery	2020	Research	10.34133/2020/1469301	Air stability	Composition	NaMn0.48Ni0.2Fe0.3Mg0.02O2				3.9	1.9	70	Super P carbon	20	polyvinylidene fluoride (PVDF)	10
412	Large-scale synthesis of the stable co-free layered oxide cathode by the synergetic contribution of multielement chemical substitution for practical sodium-ion battery	2020	Research	10.34133/2020/1469301	Air stability	Composition	NaNi0.4Cu0.05Mg0.05Mn0.4Ti0.1O2	rhombohedral			3.9	1.9	70	Super P carbon	20	polyvinylidene fluoride (PVDF)	10
413	Dual-Strategy of Cation-Doping and Nanoengineering Enables Fast and Stable Sodium-Ion Storage in a Novel Fe/Mn-Based Layered Oxide Cathode	2020	Advanced Science	10.1002/advs.202002199	Cyclability	Doping	Na2/3Fe1/2Mn1/2O2	P2	graphene	nanofibers	4	2	75	acetylene black	15	PVdF	10
414	Dual-Strategy of Cation-Doping and Nanoengineering Enables Fast and Stable Sodium-Ion Storage in a Novel Fe/Mn-Based Layered Oxide Cathode	2020	Advanced Science	10.1002/advs.202002199	Cyclability	Doping	Na2/3Mn0.8Fe0.1Ti0.1O2				4	2	75	acetylene black	15	PVdF	10
415	Dual-Strategy of Cation-Doping and Nanoengineering Enables Fast and Stable Sodium-Ion Storage in a Novel Fe/Mn-Based Layered Oxide Cathode	2020	Advanced Science	10.1002/advs.202002199	Cyclability	Doping	Na0.76Cu0.22Fe0.30Mn0.48O2	P2		nano-necklaces	4	2	75	acetylene black	15	PVdF	10
416	Dual-Strategy of Cation-Doping and Nanoengineering Enables Fast and Stable Sodium-Ion Storage in a Novel Fe/Mn-Based Layered Oxide Cathode	2020	Advanced Science	10.1002/advs.202002199	Cyclability	Doping	Na0.67Mn0.5Fe0.5O2				4	2	75	acetylene black	15	PVdF	10
417	Dual-Strategy of Cation-Doping and Nanoengineering Enables Fast and Stable Sodium-Ion Storage in a Novel Fe/Mn-Based Layered Oxide Cathode	2020	Advanced Science	10.1002/advs.202002199	Cyclability	Doping	Na0.67Ni0.33Mn0.67O2	P2			4	2	75	acetylene black	15	PVdF	10
418	Meso-structure controlled synthesis of sodium iron-manganese oxides cathode for low-cost na-ion batteries	2019	Journal of the Electrochemical Society	10.1149/2.0701912jes	Cyclability	Morphology	Na2/3Mn1/2Fe1/2O2	P2		plates	4.3	1.5	80	acetylene carbon black	10	polyvinylidene fluoride (PVDF)	10
419	Meso-structure controlled synthesis of sodium iron-manganese oxides cathode for low-cost na-ion batteries	2019	Journal of the Electrochemical Society	10.1149/2.0701912jes	Cyclability	Morphology	Na2/3Fe1/3Mn2/3O2	P2		irregular	4.3	1.5	80	acetylene carbon black	10	polyvinylidene fluoride (PVDF)	10
420	Meso-structure controlled synthesis of sodium iron-manganese oxides cathode for low-cost na-ion batteries	2019	Journal of the Electrochemical Society	10.1149/2.0701912jes	Cyclability	Morphology	Na0.67Fe1/4Mn3/4O2	P2		plates	4.3	1.5	80	acetylene carbon black	10	polyvinylidene fluoride (PVDF)	10
421	Meso-structure controlled synthesis of sodium iron-manganese oxides cathode for low-cost na-ion batteries	2019	Journal of the Electrochemical Society	10.1149/2.0701912jes	Cyclability	Morphology	Na0.67Fe1/2Mn1/2O2	P2		irregular	4.3	1.5	80	acetylene carbon black	10	polyvinylidene fluoride (PVDF)	10
422	Meso-structure controlled synthesis of sodium iron-manganese oxides cathode for low-cost na-ion batteries	2019	Journal of the Electrochemical Society	10.1149/2.0701912jes	Cyclability	Morphology	Na0.67Ni0.33Mn0.67O2				4.3	1.5	80	acetylene carbon black	10	polyvinylidene fluoride (PVDF)	10
423	New insights into understanding the exceptional electrochemical performance of P2-type manganese-based layered oxide cathode for sodium ion batteries	2018	Energy Storage Materials	10.1016/j.ensm.2018.05.001	Cyclability	Composition	Na2/3Ni1/3Mn2/3O2	hexagonal		plate	4	2	70
424	New insights into understanding the exceptional electrochemical performance of P2-type manganese-based layered oxide cathode for sodium ion batteries	2018	Energy Storage Materials	10.1016/j.ensm.2018.05.001	Cyclability	Composition	Na0.67Ni0.33Mn0.67O2	hexagonal		plate	4	2	70
425	New insights into understanding the exceptional electrochemical performance of P2-type manganese-based layered oxide cathode for sodium ion batteries	2018	Energy Storage Materials	10.1016/j.ensm.2018.05.001	Cyclability	Composition	Na0.66Li0.18Mn0.71Ni0.21Co0.08O2+δ	hexagonal			4.3	2	70
426	New insights into understanding the exceptional electrochemical performance of P2-type manganese-based layered oxide cathode for sodium ion batteries	2018	Energy Storage Materials	10.1016/j.ensm.2018.05.001	Cyclability	Composition	NaNi0.5Mn0.4Ti0.1O2	hcp		plate	4.3	2	70
427	Eutectic Synthesis of the P2-Type NaxFe1/2Mn1/2O2 Cathode with Improved Cell Design for Sodium-Ion Batteries	2020	ACS Applied Materials and Interfaces	10.1021/acsami.0c04513	Capacity	Composition	Na0.67Mn0.65Co0.2Ni0.15O2				4.3	1.5	80	carbon black	10	polyvinylidene fluoride (PVDF)	10
428	Eutectic Synthesis of the P2-Type NaxFe1/2Mn1/2O2 Cathode with Improved Cell Design for Sodium-Ion Batteries	2020	ACS Applied Materials and Interfaces	10.1021/acsami.0c04513	Capacity	Composition	Na0.5Ni0.23Fe0.13Mn0.63O2	P2			4.3	1.5	80	carbon black	10	polyvinylidene fluoride (PVDF)	10
429	Eutectic Synthesis of the P2-Type NaxFe1/2Mn1/2O2 Cathode with Improved Cell Design for Sodium-Ion Batteries	2020	ACS Applied Materials and Interfaces	10.1021/acsami.0c04513	Capacity	Composition	NaCrO2				4.3	1.5	80	carbon black	10	polyvinylidene fluoride (PVDF)	10
430	Eutectic Synthesis of the P2-Type NaxFe1/2Mn1/2O2 Cathode with Improved Cell Design for Sodium-Ion Batteries	2020	ACS Applied Materials and Interfaces	10.1021/acsami.0c04513	Capacity	Composition	Na0.6MnO2				4.3	1.5	80	carbon black	10	polyvinylidene fluoride (PVDF)	10
431	Eutectic Synthesis of the P2-Type NaxFe1/2Mn1/2O2 Cathode with Improved Cell Design for Sodium-Ion Batteries	2020	ACS Applied Materials and Interfaces	10.1021/acsami.0c04513	Capacity	Composition	Na0.67Fe0.5Mn0.5O2	P2		hexagonalplates	4.3	1.5	80	carbon black	10	polyvinylidene fluoride (PVDF)	10
432	Understanding charge compensation mechanisms in Na0.56Mg0.04Ni0.19Mn0.70O2	2019	Communications Chemistry	10.1038/s42004-019-0227-z	Mechanism	Doping	Na0.5Ni0.25Mn0.75O2				4.5	2	80	Super P	10	PVdF Kynar Flex	10
433	Understanding charge compensation mechanisms in Na0.56Mg0.04Ni0.19Mn0.70O2	2019	Communications Chemistry	10.1038/s42004-019-0227-z	Mechanism	Doping	Na0.5Ni0.23Fe0.13Mn0.63O2				4.5	2	80	Super P	10	PVdF Kynar Flex	10
434	Understanding charge compensation mechanisms in Na0.56Mg0.04Ni0.19Mn0.70O2	2019	Communications Chemistry	10.1038/s42004-019-0227-z	Mechanism	Doping	Na0.56Mg0.04Ni0.19Mn0.70O2			powder	4.5	2	80	Super P	10	PVdF Kynar Flex	10
435	Understanding charge compensation mechanisms in Na0.56Mg0.04Ni0.19Mn0.70O2	2019	Communications Chemistry	10.1038/s42004-019-0227-z	Mechanism	Doping	Na2/3Ni1/3Mn2/3O2	P2			4.5	2	80	Super P	10	PVdF Kynar Flex	10
436	Li-doping stabilized P2-Li0.2Na1.0Mn0.8O2 sodium ion cathode with oxygen redox activity	2020	International Journal of Energy Research	10.1002/er.5120	Cyclability	Doping	NaMnO2			schistose	4.5	2	80	carbon black	10	PVDF	10
437	Li-doping stabilized P2-Li0.2Na1.0Mn0.8O2 sodium ion cathode with oxygen redox activity	2020	International Journal of Energy Research	10.1002/er.5120	Cyclability	Doping	Li0.2Na1.0Mn0.8O2	P2		microparticles	4.5	2	80	carbon black	10	PVDF	10
438	Li-doping stabilized P2-Li0.2Na1.0Mn0.8O2 sodium ion cathode with oxygen redox activity	2020	International Journal of Energy Research	10.1002/er.5120	Cyclability	Doping	Na1.2MnO2			schistose	4.5	2	80	carbon black	10	PVDF	10
439	Boron-doped sodium layered oxide for reversible oxygen redox reaction in Na-ion battery cathodes	2021	Nature Communications	10.1038/s41467-021-25610-7	Cyclability	Doping	Na0.67Mn0.67Ni0.33O2				4.3	2	80	super P	10	PVdF	10
440	Boron-doped sodium layered oxide for reversible oxygen redox reaction in Na-ion battery cathodes	2021	Nature Communications	10.1038/s41467-021-25610-7	Cyclability	Doping	Na0.66Li0.22Ti0.15Mn0.63O2				4.3	2	80	super P	10	PVdF	10
441	Boron-doped sodium layered oxide for reversible oxygen redox reaction in Na-ion battery cathodes	2021	Nature Communications	10.1038/s41467-021-25610-7	Cyclability	Doping	Na0.78Ni0.23Mn0.69O2	P3			4.3	2	80	super P	10	PVdF	10
442	Boron-doped sodium layered oxide for reversible oxygen redox reaction in Na-ion battery cathodes	2021	Nature Communications	10.1038/s41467-021-25610-7	Cyclability	Doping	Na7/9Cu2/9Fe1/9Mn2/3O2	P3			4.3	2	80	super P	10	PVdF	10
443	Synergetic Anion–Cation Redox Ensures a Highly Stable Layered Cathode for Sodium-Ion Batteries	2022	Advanced Science	10.1002/advs.202105280	Cyclability	Doping	Na0.8Li0.2Fe0.2Mn0.6O2	hexagonal			4.5	1.5
444	Synergetic Anion–Cation Redox Ensures a Highly Stable Layered Cathode for Sodium-Ion Batteries	2022	Advanced Science	10.1002/advs.202105280	Cyclability	Doping	Na2/3Fe2/3Mn1/3O2	hexagonal			4.5	1.5
445	Synergetic Anion–Cation Redox Ensures a Highly Stable Layered Cathode for Sodium-Ion Batteries	2022	Advanced Science	10.1002/advs.202105280	Cyclability	Doping	LiNi0.5Co0.5O2				4.5	1.5
446	Synergetic Anion–Cation Redox Ensures a Highly Stable Layered Cathode for Sodium-Ion Batteries	2022	Advanced Science	10.1002/advs.202105280	Cyclability	Doping	LiCoO2				4.5	1.5
447	Synergetic Anion–Cation Redox Ensures a Highly Stable Layered Cathode for Sodium-Ion Batteries	2022	Advanced Science	10.1002/advs.202105280	Cyclability	Doping	Na0.8Li0.2Fe0.2Mn0.6O2	hexagonal			4.5	1.5
448	Na-ion mobility in P2-type Na0.5Mg: X Ni0.17- x Mn0.83O2(0 ≤ x ≤ 0.07) from electrochemical and muon spin relaxation studies	2021	Physical Chemistry Chemical Physics	10.1039/d1cp03115e	Cyclability	Doping	NaNi1/3Co1/3Mn1/3O2				4.5	2	80	Super P	10	polyvinyldene fluoride (PVdF Kynar Flex)	10
449	Na-ion mobility in P2-type Na0.5Mg: X Ni0.17- x Mn0.83O2(0 ≤ x ≤ 0.07) from electrochemical and muon spin relaxation studies	2021	Physical Chemistry Chemical Physics	10.1039/d1cp03115e	Cyclability	Doping	Na2/3Ni1/3Mn2/3O2	P2	carbon		4.5	2	80	Super P	10	polyvinyldene fluoride (PVdF Kynar Flex)	10
450	Na-ion mobility in P2-type Na0.5Mg: X Ni0.17- x Mn0.83O2(0 ≤ x ≤ 0.07) from electrochemical and muon spin relaxation studies	2021	Physical Chemistry Chemical Physics	10.1039/d1cp03115e	Cyclability	Doping	Na0.56Mg0.04Ni0.19Mn0.70O2				4.5	2	80	Super P	10	polyvinyldene fluoride (PVdF Kynar Flex)	10
451	Na-ion mobility in P2-type Na0.5Mg: X Ni0.17- x Mn0.83O2(0 ≤ x ≤ 0.07) from electrochemical and muon spin relaxation studies	2021	Physical Chemistry Chemical Physics	10.1039/d1cp03115e	Cyclability	Doping	Na0.67Mn0.67Ni0.33O2				4.5	2	80	Super P	10	polyvinyldene fluoride (PVdF Kynar Flex)	10
452	Deciphering the Origin of High Electrochemical Performance in a Novel Ti-Substituted P2/O3 Biphasic Cathode for Sodium-Ion Batteries	2020	ACS Applied Materials and Interfaces	10.1021/acsami.0c11427	Cyclability	Doping	Na0.5Ni0.23Fe0.13Mn0.63O2	P2		hexagonal	4	2	80	Super P	10	polyvinylidene fluoride	10
453	Deciphering the Origin of High Electrochemical Performance in a Novel Ti-Substituted P2/O3 Biphasic Cathode for Sodium-Ion Batteries	2020	ACS Applied Materials and Interfaces	10.1021/acsami.0c11427	Cyclability	Doping	Na(Mn0.25Fe0.25Co0.25Ni0.25)O2	O3		hexagonal	4	1.5	80	Super P	10	polyvinylidene fluoride	10
454	Deciphering the Origin of High Electrochemical Performance in a Novel Ti-Substituted P2/O3 Biphasic Cathode for Sodium-Ion Batteries	2020	ACS Applied Materials and Interfaces	10.1021/acsami.0c11427	Cyclability	Doping	Na2/3Ni1/3Mn2/3O2	P2		hexagonal	4	2	80	Super P	10	polyvinylidene fluoride	10
455	Insight on the Enhanced Reversibility of a Multimetal Layered Oxide for Sodium-Ion Battery	2018	Journal of Physical Chemistry C	10.1021/acs.jpcc.8b07596	Cyclability	Composition	Na0.48Al0.03Co0.18Ni0.18Mn0.47O2	P3/P2		flakes	4.6	1.4	80	Super P	10	poly(vinylidene difluoride)	10
456	Tuning P2-Structured Cathode Material by Na-Site Mg Substitution for Na-Ion Batteries	2019	Journal of the American Chemical Society	10.1021/jacs.8b08638	Cyclability	Doping	Na2/3Ni1/3Mn2/3O2	P2			4.2	1.5	70	carbon black	20	polyvinylidene fluoride	10
457	Tuning P2-Structured Cathode Material by Na-Site Mg Substitution for Na-Ion Batteries	2019	Journal of the American Chemical Society	10.1021/jacs.8b08638	Cyclability	Doping	NaTMO2(TM=Co, Mn, Fe, Ni)	P2			4.2	1.5	70	carbon black	20	polyvinylidene fluoride	10
458	Tuning P2-Structured Cathode Material by Na-Site Mg Substitution for Na-Ion Batteries	2019	Journal of the American Chemical Society	10.1021/jacs.8b08638	Cyclability	Doping	Na0.7Mn0.6Ni0.4O2	P2			4.2	1.5	70	carbon black	20	polyvinylidene fluoride	10
459	Structural Aspects of P2-Type Na0.67Mn0.6Ni0.2Li0.2O2 (MNL) Stabilization by Lithium Defects as a Cathode Material for Sodium-Ion Batteries	2021	Advanced Functional Materials	10.1002/adfm.202102939	Cyclability	Doping	Na0.67Mn0.6Ni0.2Li0.2O2	P2			4.6	2	70
460	Structural Aspects of P2-Type Na0.67Mn0.6Ni0.2Li0.2O2 (MNL) Stabilization by Lithium Defects as a Cathode Material for Sodium-Ion Batteries	2021	Advanced Functional Materials	10.1002/adfm.202102939	Cyclability	Doping	Na0.67Mn0.6Ni0.4O2	P2			4.6	2	70
461	Structural Aspects of P2-Type Na0.67Mn0.6Ni0.2Li0.2O2 (MNL) Stabilization by Lithium Defects as a Cathode Material for Sodium-Ion Batteries	2021	Advanced Functional Materials	10.1002/adfm.202102939	Cyclability	Doping	Na0.67Mn0.8Ni0.2O2	P2			4.6	2	70
462	Structural Aspects of P2-Type Na0.67Mn0.6Ni0.2Li0.2O2 (MNL) Stabilization by Lithium Defects as a Cathode Material for Sodium-Ion Batteries	2021	Advanced Functional Materials	10.1002/adfm.202102939	Cyclability	Doping	Na0.67Li0.1Mn0.6Ni0.2Li0.1O2	P2			4.6	2	70
463	Structural Aspects of P2-Type Na0.67Mn0.6Ni0.2Li0.2O2 (MNL) Stabilization by Lithium Defects as a Cathode Material for Sodium-Ion Batteries	2021	Advanced Functional Materials	10.1002/adfm.202102939	Cyclability	Doping	Na0.33Li0.1(Mn0.6Ni0.2Li0.1)O2	P2			4.6	2	70
464	Role of Lithium Doping in P2-Na0.67Ni0.33Mn0.67O2for Sodium-Ion Batteries	2021	Chemistry of Materials	10.1021/acs.chemmater.1c00569	Cyclability	Doping	NaNi0.6Co0.4O2				4	2.25	80	C45 (Timcal)	10	poly(vinylidene fluoride)	10
465	Role of Lithium Doping in P2-Na0.67Ni0.33Mn0.67O2for Sodium-Ion Batteries	2021	Chemistry of Materials	10.1021/acs.chemmater.1c00569	Cyclability	Doping	Na2/3Ni1/3Mn2/3O2	P2			4	2	80	C45 (Timcal)	10	poly(vinylidene fluoride)	10
466	Role of Lithium Doping in P2-Na0.67Ni0.33Mn0.67O2for Sodium-Ion Batteries	2021	Chemistry of Materials	10.1021/acs.chemmater.1c00569	Cyclability	Doping	Na2/3Fe1/3Mn2/3O2	P2			4	2	80	C45 (Timcal)	10	poly(vinylidene fluoride)	10
467	Role of Lithium Doping in P2-Na0.67Ni0.33Mn0.67O2for Sodium-Ion Batteries	2021	Chemistry of Materials	10.1021/acs.chemmater.1c00569	Cyclability	Doping	NaNi1/3Fe1/3Mn1/3O2	P2			4		80	C45 (Timcal)	10	poly(vinylidene fluoride)	10
468	Multiprincipal Component P2-Na0.6(Ti0.2Mn0.2Co0.2Ni0.2Ru0.2)O2as a High-Rate Cathode for Sodium-Ion Batteries	2021	JACS Au	10.1021/jacsau.0c00002	power	Composition	Na0.6(Ti0.2Mn0.2Co0.2Ni0.2Ru0.2)O2	P2		plate-like	4.5	1.5
469	Multiprincipal Component P2-Na0.6(Ti0.2Mn0.2Co0.2Ni0.2Ru0.2)O2as a High-Rate Cathode for Sodium-Ion Batteries	2021	JACS Au	10.1021/jacsau.0c00002	power	Composition	Na2/3(Mn1/2Fe1/4Co1/4)O2	P2			4.5	1.5
470	Multiprincipal Component P2-Na0.6(Ti0.2Mn0.2Co0.2Ni0.2Ru0.2)O2as a High-Rate Cathode for Sodium-Ion Batteries	2021	JACS Au	10.1021/jacsau.0c00002	power	Composition	Na2/3Ni1/3Mn1/3Ti1/3O2	P2			4.5	1.5
471	Multiprincipal Component P2-Na0.6(Ti0.2Mn0.2Co0.2Ni0.2Ru0.2)O2as a High-Rate Cathode for Sodium-Ion Batteries	2021	JACS Au	10.1021/jacsau.0c00002	power	Composition	Na0.67Mn0.5Fe0.3Ni0.2O2	P2			4.5	1.5
472	Multiprincipal Component P2-Na0.6(Ti0.2Mn0.2Co0.2Ni0.2Ru0.2)O2as a High-Rate Cathode for Sodium-Ion Batteries	2021	JACS Au	10.1021/jacsau.0c00002	power	Composition	Na0.67Ni0.3Mn0.7O2	P2			4.5	1.5
473	Insights into the Performance Degradation of Oxygen-Type Manganese-Rich Layered Oxide Cathodes for High-Voltage Sodium-Ion Batteries	2018	ACS Applied Energy Materials	10.1021/acsaem.8b01325	Cyclability	Crystal	Na0.67Ni0.23Mg0.1Mn0.67O2				4.2	2	70	C-45 carbon black	20	poly(vinylidene difluoride)	10
474	Insights into the Performance Degradation of Oxygen-Type Manganese-Rich Layered Oxide Cathodes for High-Voltage Sodium-Ion Batteries	2018	ACS Applied Energy Materials	10.1021/acsaem.8b01325	Cyclability	Crystal	Na2/3Ni1/3Mn2/3O2	P2			4.2	2	70	C-45 carbon black	20	poly(vinylidene difluoride)	10
475	A monoclinic polymorph of sodium birnessite for ultrafast and ultrastable sodium ion storage	2018	Nature Communications	10.1038/s41467-018-07595-y	Cyclability	Morphology	NaMnO2	monoclinic		nanosheet	4	2	80	Super P	10	PVDF	10
476	A monoclinic polymorph of sodium birnessite for ultrafast and ultrastable sodium ion storage	2018	Nature Communications	10.1038/s41467-018-07595-y	Cyclability	Morphology	Na0.78Ni0.23Mn0.69O2				3.5	1.7	80	Super P	10	PVDF	10
477	A monoclinic polymorph of sodium birnessite for ultrafast and ultrastable sodium ion storage	2018	Nature Communications	10.1038/s41467-018-07595-y	Cyclability	Morphology	Na0.6Cr0.6Ti0.4O2				3.5	1.7	80	Super P	10	PVDF	10
478	A monoclinic polymorph of sodium birnessite for ultrafast and ultrastable sodium ion storage	2018	Nature Communications	10.1038/s41467-018-07595-y	Cyclability	Morphology	Na0.7CoO2	P2			3.8	2	80	Super P	10	PVDF	10
479	From tunnel NMO to layered polymorphs oxides for sodium ion batteries	2020	SN Applied Sciences	10.1007/s42452-020-03607-z	Cyclability	Doping	Na0.44MnO2		Al2O3		4.8	1.5	80	carbon Super C65	10	Polyvinylidene fluoride (PVdF)	10
480	From tunnel NMO to layered polymorphs oxides for sodium ion batteries	2020	SN Applied Sciences	10.1007/s42452-020-03607-z	Cyclability	Doping	Na0.61Mn0.27Fe0.34Ti0.39O2				4.8	1.5	80	carbon Super C65	10	Polyvinylidene fluoride (PVdF)	10
481	From tunnel NMO to layered polymorphs oxides for sodium ion batteries	2020	SN Applied Sciences	10.1007/s42452-020-03607-z	Cyclability	Doping	NaNi0.5Mn0.5O2	layered	carbon		4.8	1.5	80	carbon Super C65	10	Polyvinylidene fluoride (PVdF)	10
482	From tunnel NMO to layered polymorphs oxides for sodium ion batteries	2020	SN Applied Sciences	10.1007/s42452-020-03607-z	Cyclability	Doping	NaCrO2	P	gold		4.8	1.5	80	carbon Super C65	10	Polyvinylidene fluoride (PVdF)	10
483	From tunnel NMO to layered polymorphs oxides for sodium ion batteries	2020	SN Applied Sciences	10.1007/s42452-020-03607-z	Cyclability	Doping	Na0.44Mn0.5Fe0.5O2				4.8	1.5	80	carbon Super C65	10	Polyvinylidene fluoride (PVdF)	10
484	Deciphering the Cathode–Electrolyte Interfacial Chemistry in Sodium Layered Cathode Materials	2018	Advanced Energy Materials	10.1002/aenm.201801975	Cyclability	Composition	NaNi1/3Fe1/3Mn1/3O2	O3	Na2CO3	porous	4.3	2	85	acetylene carbon	10	polyvinylidene fluoride (pVdF)	5
485	Deciphering the Cathode–Electrolyte Interfacial Chemistry in Sodium Layered Cathode Materials	2018	Advanced Energy Materials	10.1002/aenm.201801975	Cyclability	Composition	Na2/3Fe1/2Mn1/2O2				4	2	85	acetylene carbon	10	polyvinylidene fluoride (pVdF)	5
486	Deciphering the Cathode–Electrolyte Interfacial Chemistry in Sodium Layered Cathode Materials	2018	Advanced Energy Materials	10.1002/aenm.201801975	Cyclability	Composition	NaFeO2				4	2	85	acetylene carbon	10	polyvinylidene fluoride (pVdF)	5
487	Deciphering the Cathode–Electrolyte Interfacial Chemistry in Sodium Layered Cathode Materials	2018	Advanced Energy Materials	10.1002/aenm.201801975	Cyclability	Composition	Na0.67Mn0.5Fe0.5O2				4	2	85	acetylene carbon	10	polyvinylidene fluoride (pVdF)	5
488	Deciphering the Cathode–Electrolyte Interfacial Chemistry in Sodium Layered Cathode Materials	2018	Advanced Energy Materials	10.1002/aenm.201801975	Cyclability	Composition	NaNi0.5Mn0.5O2	O3		porous	4.3	2	85	acetylene carbon	10	polyvinylidene fluoride (pVdF)	5
489	Exploring the charge compensation mechanism of P2-type Na0.6Mg0.3Mn0.7O2 cathode materials for advanced sodium-ion batteries	2020	Energies	10.3390/en13215729	Mechanism	Composition	Na0.78Ni0.23Mn0.69O2	P2		plate-like	4.5	1.5	80	acetylene black	10	polyvinylidene fluoride (PVDF)	10
490	Novel layered K0.7Mn0.7Ni0.3O2 cathode material with enlarged diffusion channels for high energy density sodium-ion batteries; [具有大扩散通道的新型层状K0.7Mn0.7Ni0.3O2正极 材料用于高能量密度钠离子电池]	2020	Science China Materials	10.1007/s40843-020-1274-0	Capacity	Composition	Na2/3Ni1/3Mn2/3O2	hexagonal			4	2	70	acetylene black	20	polyvinylidene fluoride (PVDF)	10
491	Novel layered K0.7Mn0.7Ni0.3O2 cathode material with enlarged diffusion channels for high energy density sodium-ion batteries; [具有大扩散通道的新型层状K0.7Mn0.7Ni0.3O2正极 材料用于高能量密度钠离子电池]	2020	Science China Materials	10.1007/s40843-020-1274-0	Capacity	Composition	Na0.7CoO2	hexagonal			4	2	70	acetylene black	20	polyvinylidene fluoride (PVDF)	10
492	Novel layered K0.7Mn0.7Ni0.3O2 cathode material with enlarged diffusion channels for high energy density sodium-ion batteries; [具有大扩散通道的新型层状K0.7Mn0.7Ni0.3O2正极 材料用于高能量密度钠离子电池]	2020	Science China Materials	10.1007/s40843-020-1274-0	Capacity	Composition	NaNi1/3Mn1/3Co1/3O2	hexagonal		single-crystalline	4	2	70	acetylene black	20	polyvinylidene fluoride (PVDF)	10
493	Novel layered K0.7Mn0.7Ni0.3O2 cathode material with enlarged diffusion channels for high energy density sodium-ion batteries; [具有大扩散通道的新型层状K0.7Mn0.7Ni0.3O2正极 材料用于高能量密度钠离子电池]	2020	Science China Materials	10.1007/s40843-020-1274-0	Capacity	Composition	NaNi1/3Fe1/3Mn1/3O2	hexagonal		single-crystalline	4	2	70	acetylene black	20	polyvinylidene fluoride (PVDF)	10
494	Anionic Redox Reaction-Induced High-Capacity and Low-Strain Cathode with Suppressed Phase Transition	2019	Joule	10.1016/j.joule.2018.10.022	Capacity	Composition	Na0.72Li0.24Mn0.76O2	P2			4.5	1.5	80	carbon nanotube	15	polytetrafluoroethylene	5
495	Degradation of Layered Oxide Cathode in a Sodium Battery: A Detailed Investigation by X-Ray Tomography at the Nanoscale	2021	Small Methods	10.1002/smtd.202100596	Mechanism	Morphology	Na0.48Al0.03Co0.18Ni0.18Mn0.47O2	layered		layered	4.6	1.4	80	carbon black	10	PVDF	10
496	Revealing the Structural Evolution and Phase Transformation of O3-Type NaNi1/3Fe1/3Mn1/3O2Cathode Material on Sintering and Cycling Processes	2020	ACS Applied Energy Materials	10.1021/acsaem.0c00475	Mechanism	Composition	NaNi1/3Fe1/3Mn1/3O2	O3		spherical	4	2	70
497	Revealing the Structural Evolution and Phase Transformation of O3-Type NaNi1/3Fe1/3Mn1/3O2Cathode Material on Sintering and Cycling Processes	2020	ACS Applied Energy Materials	10.1021/acsaem.0c00475	Mechanism	Composition	NaFe1/2Mn1/2O2				4	2	70
498	Revealing the Structural Evolution and Phase Transformation of O3-Type NaNi1/3Fe1/3Mn1/3O2Cathode Material on Sintering and Cycling Processes	2020	ACS Applied Energy Materials	10.1021/acsaem.0c00475	Mechanism	Composition	Na2/3Ni1/3Mn2/3O2	P2			4	2	70
499	Revealing the Structural Evolution and Phase Transformation of O3-Type NaNi1/3Fe1/3Mn1/3O2Cathode Material on Sintering and Cycling Processes	2020	ACS Applied Energy Materials	10.1021/acsaem.0c00475	Mechanism	Composition	NaNi1/3Mn1/3Co1/3O2	O3			4	2	70
500	Revealing the Structural Evolution and Phase Transformation of O3-Type NaNi1/3Fe1/3Mn1/3O2Cathode Material on Sintering and Cycling Processes	2020	ACS Applied Energy Materials	10.1021/acsaem.0c00475	Mechanism	Composition	NaFe0.5Co0.5O2				4	2	70
501	Rational Design of a P2-Type Spherical Layered Oxide Cathode for High-Performance Sodium-Ion Batteries	2019	ACS Central Science	10.1021/acscentsci.9b00982	Cyclability	Composition	Na2/3Ni1/6Mn2/3Cu1/9Mg1/18O2	P2		microspheres	N/A	N/A	60	acetylene black	20	polyvinylidene fluoride (PVDF)	20
502	Rational Design of a P2-Type Spherical Layered Oxide Cathode for High-Performance Sodium-Ion Batteries	2019	ACS Central Science	10.1021/acscentsci.9b00982	Cyclability	Composition	Na0.86Co0.475Mn0.475Ti0.05O2				4.5	1.5	60	acetylene black	20	polyvinylidene fluoride (PVDF)	20
503	Rational Design of a P2-Type Spherical Layered Oxide Cathode for High-Performance Sodium-Ion Batteries	2019	ACS Central Science	10.1021/acscentsci.9b00982	Cyclability	Composition	Na0.67Mn0.65Ni0.2Co0.15O2	P2			4.5	1.5	60	acetylene black	20	polyvinylidene fluoride (PVDF)	20
504	Rational Design of a P2-Type Spherical Layered Oxide Cathode for High-Performance Sodium-Ion Batteries	2019	ACS Central Science	10.1021/acscentsci.9b00982	Cyclability	Composition	Na0.66Li0.18Mn0.71Mg0.21Co0.08O2	P2		microspheres	4.5	1.5	60	acetylene black	20	polyvinylidene fluoride (PVDF)	20
505	Rational Design of a P2-Type Spherical Layered Oxide Cathode for High-Performance Sodium-Ion Batteries	2019	ACS Central Science	10.1021/acscentsci.9b00982	Cyclability	Composition	Na0.78Ni0.23Mn0.69O2	P2			4.5	1.5	60	acetylene black	20	polyvinylidene fluoride (PVDF)	20
506	Structural Stabilization of P2-type Sodium Iron Manganese Oxides by Electrochemically Inactive Mg Substitution: Insights of Redox Behavior and Voltage Decay	2020	ChemSusChem	10.1002/cssc.202001963	Cyclability	Doping	Na0.8Mn0.5Fe0.5O2	P2		particles	4.2	1.5	80	superC65	10	polyvinylidene fluoride (PVdF)	10
507	Effect of Electrolytes on the Cathode-Electrolyte Interfacial Stability of Fe-Based Layered Cathodes for Sodium-Ion Batteries	2022	Journal of the Electrochemical Society	10.1149/1945-7111/ac5c41	Cyclability	Composition	NaFeO2	layered		granular	3.8		80	super P carbon	10	polyvinylidene fluoride	10
508	Effect of Electrolytes on the Cathode-Electrolyte Interfacial Stability of Fe-Based Layered Cathodes for Sodium-Ion Batteries	2022	Journal of the Electrochemical Society	10.1149/1945-7111/ac5c41	Cyclability	Composition	NaNi0.5Mn0.5O2				3.8	2	80	super P carbon	10	polyvinylidene fluoride	10
509	Effect of Electrolytes on the Cathode-Electrolyte Interfacial Stability of Fe-Based Layered Cathodes for Sodium-Ion Batteries	2022	Journal of the Electrochemical Society	10.1149/1945-7111/ac5c41	Cyclability	Composition	NaCoO2				3.8		80	super P carbon	10	polyvinylidene fluoride	10
510	Effect of Electrolytes on the Cathode-Electrolyte Interfacial Stability of Fe-Based Layered Cathodes for Sodium-Ion Batteries	2022	Journal of the Electrochemical Society	10.1149/1945-7111/ac5c41	Cyclability	Composition	NaMnO2				3.8		80	super P carbon	10	polyvinylidene fluoride	10
511	Effect of Electrolytes on the Cathode-Electrolyte Interfacial Stability of Fe-Based Layered Cathodes for Sodium-Ion Batteries	2022	Journal of the Electrochemical Society	10.1149/1945-7111/ac5c41	Cyclability	Composition	NaCrO2				3.8		80	super P carbon	10	polyvinylidene fluoride	10
512	Ni- and/or Mn-based layered transition metal oxides as cathode materials for sodium ion batteries: Status, challenges and countermeasures	2019	Journal of Materials Chemistry A	10.1039/c8ta12441h	Cyclability	Composition	Na0.67Mn0.65Ni0.15Co0.15Al0.05O2				4.5	2
513	Ni- and/or Mn-based layered transition metal oxides as cathode materials for sodium ion batteries: Status, challenges and countermeasures	2019	Journal of Materials Chemistry A	10.1039/c8ta12441h	Cyclability	Composition	Na2/3(Mn0.54Ni0.13Co0.13)O2	P2	Al2O3	microflakes	4.5	2
514	Ni- and/or Mn-based layered transition metal oxides as cathode materials for sodium ion batteries: Status, challenges and countermeasures	2019	Journal of Materials Chemistry A	10.1039/c8ta12441h	Cyclability	Composition	Na2/3Mn0.55Ni0.30Co0.15O2				4.5	2
515	Ni- and/or Mn-based layered transition metal oxides as cathode materials for sodium ion batteries: Status, challenges and countermeasures	2019	Journal of Materials Chemistry A	10.1039/c8ta12441h	Cyclability	Composition	NaNi1/2Mn1/2O2				4
516	Ni- and/or Mn-based layered transition metal oxides as cathode materials for sodium ion batteries: Status, challenges and countermeasures	2019	Journal of Materials Chemistry A	10.1039/c8ta12441h	Cyclability	Composition	NaNi1/3Fe1/3Mn1/3O2				4
517	On Disrupting the Na+-Ion/Vacancy Ordering in P2-Type Sodium-Manganese-Nickel Oxide Cathodes for Na+-Ion Batteries	2018	Journal of Physical Chemistry C	10.1021/acs.jpcc.8b05537	Cyclability	Composition	Na0.67MnO2	hexagonal			4.05	1.5	84	Super P Li	8	polytetrafluoroethylene (Solvay 5130)	8
518	On Disrupting the Na+-Ion/Vacancy Ordering in P2-Type Sodium-Manganese-Nickel Oxide Cathodes for Na+-Ion Batteries	2018	Journal of Physical Chemistry C	10.1021/acs.jpcc.8b05537	Cyclability	Composition	Na0.67Mn0.9Mg0.1O2				4.3	1.5	84	Super P Li	8	polytetrafluoroethylene (Solvay 5130)	8
519	On Disrupting the Na+-Ion/Vacancy Ordering in P2-Type Sodium-Manganese-Nickel Oxide Cathodes for Na+-Ion Batteries	2018	Journal of Physical Chemistry C	10.1021/acs.jpcc.8b05537	Cyclability	Composition	Na0.67Mn0.67Ni0.33O2	P2			4.05	1.5	84	Super P Li	8	polytetrafluoroethylene (Solvay 5130)	8
520	On Disrupting the Na+-Ion/Vacancy Ordering in P2-Type Sodium-Manganese-Nickel Oxide Cathodes for Na+-Ion Batteries	2018	Journal of Physical Chemistry C	10.1021/acs.jpcc.8b05537	Cyclability	Composition	Na0.62Mn0.75Ni0.25O2	hexagonal		powder	4.3	1.5	84	Super P Li	8	polytetrafluoroethylene (Solvay 5130)	8
521	On Disrupting the Na+-Ion/Vacancy Ordering in P2-Type Sodium-Manganese-Nickel Oxide Cathodes for Na+-Ion Batteries	2018	Journal of Physical Chemistry C	10.1021/acs.jpcc.8b05537	Cyclability	Composition	Na2/3Fe2/3Mn1/3O2	hexagonal			4.05	1.5	84	Super P Li	8	polytetrafluoroethylene (Solvay 5130)	8
522	Degradation by Kinking in Layered Cathode Materials	2021	ACS Energy Letters	10.1021/acsenergylett.1c01976	Mechanism	Morphology	Na0.70Mn0.60Ni0.30Co0.10O2	single-crystal			4.4	1.5	70	carbon black	20	PVDF	10
523	Degradation by Kinking in Layered Cathode Materials	2021	ACS Energy Letters	10.1021/acsenergylett.1c01976	Mechanism	Morphology	Na0.78Ni0.23Mn0.69O2	single-crystal			4.4	1.5	70	carbon black	20	PVDF	10
524	Degradation by Kinking in Layered Cathode Materials	2021	ACS Energy Letters	10.1021/acsenergylett.1c01976	Mechanism	Morphology	LiNi0.8Co0.1Mn0.1O2	singlecrystal			4.3	3	70	carbon black	20	PVDF	10
525	Degradation by Kinking in Layered Cathode Materials	2021	ACS Energy Letters	10.1021/acsenergylett.1c01976	Mechanism	Morphology	LiNi0.8Co0.15Al0.05O2				4.3	3	70	carbon black	20	PVDF	10
526	Realizing Complete Solid-Solution Reaction in High Sodium Content P2-Type Cathode for High-Performance Sodium-Ion Batteries	2020	Angewandte Chemie - International Edition	10.1002/anie.202003972	Cyclability	Composition	Na0.85Li0.12Ni0.22Mn0.66O2	P2		plate-like	4.3	2	70	carbon black	20	PVDF	10
527	Realizing Complete Solid-Solution Reaction in High Sodium Content P2-Type Cathode for High-Performance Sodium-Ion Batteries	2020	Angewandte Chemie - International Edition	10.1002/anie.202003972	Cyclability	Composition	Na0.67Ni0.33Mn0.67O2	P2		plate-like	4.3	2	70	carbon black	20	PVDF	10
528	Realizing Complete Solid-Solution Reaction in High Sodium Content P2-Type Cathode for High-Performance Sodium-Ion Batteries	2020	Angewandte Chemie - International Edition	10.1002/anie.202003972	Cyclability	Composition	Na0.67Mn0.67Co0.33O2	P2		plate-like	4.3	2	70	carbon black	20	PVDF	10
529	Realizing Complete Solid-Solution Reaction in High Sodium Content P2-Type Cathode for High-Performance Sodium-Ion Batteries	2020	Angewandte Chemie - International Edition	10.1002/anie.202003972	Cyclability	Composition	Na0.67Ni0.33Fe0.33Mn0.33O2	P2		plate-like	4.3	2	70	carbon black	20	PVDF	10
530	Realizing Complete Solid-Solution Reaction in High Sodium Content P2-Type Cathode for High-Performance Sodium-Ion Batteries	2020	Angewandte Chemie - International Edition	10.1002/anie.202003972	Cyclability	Composition	Na0.67Ni0.33Mn0.67O2	P2		plate-like	4.3	2	70	carbon black	20	PVDF	10
531	Lithium-Doping Stabilized High-Performance P2-Na0.66Li0.18Fe0.12Mn0.7O2 Cathode for Sodium Ion Batteries	2019	Journal of the American Chemical Society	10.1021/jacs.9b01855	Cyclability	Doping	Na0.67Ni0.22Cu0.11Mn0.56Ti0.11O2	hexagonal		cylindrical	4.5	1.5	80	carbon black	10	PVdF	10
532	Lithium-Doping Stabilized High-Performance P2-Na0.66Li0.18Fe0.12Mn0.7O2 Cathode for Sodium Ion Batteries	2019	Journal of the American Chemical Society	10.1021/jacs.9b01855	Cyclability	Doping	Na0.6Li0.2Mn0.8O2				4.5	1.5	80	carbon black	10	PVdF	10
533	Lithium-Doping Stabilized High-Performance P2-Na0.66Li0.18Fe0.12Mn0.7O2 Cathode for Sodium Ion Batteries	2019	Journal of the American Chemical Society	10.1021/jacs.9b01855	Cyclability	Doping	Na0.66Li0.18Fe0.12Mn0.7O2	P2		hexagonalcylindrical	4.5	1.5	80	carbon black	10	PVdF	10
534	Lithium-Doping Stabilized High-Performance P2-Na0.66Li0.18Fe0.12Mn0.7O2 Cathode for Sodium Ion Batteries	2019	Journal of the American Chemical Society	10.1021/jacs.9b01855	Cyclability	Doping	Na2/3Ni1/3Mn2/3O2				4.5	1.5	80	carbon black	10	PVdF	10
535	Lithium-Doping Stabilized High-Performance P2-Na0.66Li0.18Fe0.12Mn0.7O2 Cathode for Sodium Ion Batteries	2019	Journal of the American Chemical Society	10.1021/jacs.9b01855	Cyclability	Doping	Na0.66Li0.18Fe0.12Mn0.7O2	P2		hexagonalcylindrical	4.5	1.5	80	carbon black	10	PVdF	10
536	An ion conductive polyimide encapsulation: New insight and significant performance enhancement of sodium based P2 layered cathodes	2019	Energy Storage Materials	10.1016/j.ensm.2019.07.010	Cyclability	Coating	0.45Ni0.22Co0.11Mn0.66O2	hexagonal	alumina	flake-shaped	4.5	2	70	carbon	20	polyimide (PI)	10
537	An ion conductive polyimide encapsulation: New insight and significant performance enhancement of sodium based P2 layered cathodes	2019	Energy Storage Materials	10.1016/j.ensm.2019.07.010	Cyclability	Coating	Na0.85Li0.17Ni0.21Mn0.64O2	hexagonal			4.3		70	carbon	20	polyimide (PI)	10
538	An ion conductive polyimide encapsulation: New insight and significant performance enhancement of sodium based P2 layered cathodes	2019	Energy Storage Materials	10.1016/j.ensm.2019.07.010	Cyclability	Coating	Na0.67(Mn0.65Co0.2Ni0.15)O2	hexagonal	PI	flake-shaped	4.5	2	70	carbon	20	polyimide (PI)	10
539	An ion conductive polyimide encapsulation: New insight and significant performance enhancement of sodium based P2 layered cathodes	2019	Energy Storage Materials	10.1016/j.ensm.2019.07.010	Cyclability	Coating	NaFe1/2Mn1/2O2	hexagonal	alumina	flake-shaped	4.3		70	carbon	20	polyimide (PI)	10
540	Ca-substituted P3-type NaxNi1/3Mn1/3Co1/3O2 as a potential high voltage cathode active material for sodium-ion batteries	2021	Journal of Power Sources	10.1016/j.jpowsour.2020.229346	Cyclability	Doping	NaNi1/3Mn1/3Co1/3O2	P3			4.5	1.3	80	acetylene black	10	PVdF-HFP	10
541	Ca-substituted P3-type NaxNi1/3Mn1/3Co1/3O2 as a potential high voltage cathode active material for sodium-ion batteries	2021	Journal of Power Sources	10.1016/j.jpowsour.2020.229346	Cyclability	Doping	NaFe0.5Co0.5O2				4.2	2.5	80	acetylene black	10	PVdF-HFP	10
542	Ca-substituted P3-type NaxNi1/3Mn1/3Co1/3O2 as a potential high voltage cathode active material for sodium-ion batteries	2021	Journal of Power Sources	10.1016/j.jpowsour.2020.229346	Cyclability	Doping	NaCoO2	P3			4.5	1.3	80	acetylene black	10	PVdF-HFP	10
543	Ca-substituted P3-type NaxNi1/3Mn1/3Co1/3O2 as a potential high voltage cathode active material for sodium-ion batteries	2021	Journal of Power Sources	10.1016/j.jpowsour.2020.229346	Cyclability	Doping	NaFeO2	P3			4.2	2.5	80	acetylene black	10	PVdF-HFP	10
544	Ca-substituted P3-type NaxNi1/3Mn1/3Co1/3O2 as a potential high voltage cathode active material for sodium-ion batteries	2021	Journal of Power Sources	10.1016/j.jpowsour.2020.229346	Cyclability	Doping	Na0.52Ca0.04Ni1/3Mn1/3Co1/3O2	P3			4.2	2.5	80	acetylene black	10	PVdF-HFP	10
545	Defect and structural evolution under high-energy ion irradiation informs battery materials design for extreme environments	2020	Nature Communications	10.1038/s41467-020-18345-4	Mechanism	Other	Na2/3Fe1/2Mn1/2O2	hexagonal			4.5	1.5	80	carbon black	15	poly(vinylidene difluoride) (PVDF)	5
546	Revealing High Na-Content P2-Type Layered Oxides as Advanced Sodium-Ion Cathodes	2020	Journal of the American Chemical Society	10.1021/jacs.9b13572	Cyclability	Composition	Na0.67Mn0.5Fe0.5O2	P2			4	2	85
547	Revealing High Na-Content P2-Type Layered Oxides as Advanced Sodium-Ion Cathodes	2020	Journal of the American Chemical Society	10.1021/jacs.9b13572	Cyclability	Composition	Na2/3Ni1/3Mn5/9Al1/9O2	hexagonal		platelike	4	2	85
548	Tuning local chemistry of P2 layered-oxide cathode for high energy and long cycles of sodium-ion battery	2021	Nature Communications	10.1038/s41467-021-22523-3	Capacity	Doping	Na2/3Mg1/3Ti1/6Mn1/2O2			SEM	4.3		80	Super P	10	polytetrafluoroethylene	10
549	Tuning local chemistry of P2 layered-oxide cathode for high energy and long cycles of sodium-ion battery	2021	Nature Communications	10.1038/s41467-021-22523-3	Capacity	Doping	Na5/8MnO2			SEM	4.3		80	Super P	10	polytetrafluoroethylene	10
550	Tuning local chemistry of P2 layered-oxide cathode for high energy and long cycles of sodium-ion battery	2021	Nature Communications	10.1038/s41467-021-22523-3	Capacity	Doping	Na7/9Cu2/9Fe1/9Mn2/3O2			SEM	4.3	1.8	80	Super P	10	polytetrafluoroethylene	10
551	Ultralow-Strain Zn-Substituted Layered Oxide Cathode with Suppressed P2–O2 Transition for Stable Sodium Ion Storage	2020	Advanced Functional Materials	10.1002/adfm.201910327	Cyclability	Doping	Na0.72Li0.24Mn0.76O2				4.5	2
552	Ultralow-Strain Zn-Substituted Layered Oxide Cathode with Suppressed P2–O2 Transition for Stable Sodium Ion Storage	2020	Advanced Functional Materials	10.1002/adfm.201910327	Cyclability	Doping	Na2/3Zn0.2Mn0.8O2	P2		irregular	4.2	2
553	Ultralow-Strain Zn-Substituted Layered Oxide Cathode with Suppressed P2–O2 Transition for Stable Sodium Ion Storage	2020	Advanced Functional Materials	10.1002/adfm.201910327	Cyclability	Doping	Na2/3Mn7/9Zn2/9O2	P2		irregular	4.2
554	Ultralow-Strain Zn-Substituted Layered Oxide Cathode with Suppressed P2–O2 Transition for Stable Sodium Ion Storage	2020	Advanced Functional Materials	10.1002/adfm.201910327	Cyclability	Doping	Na0.72Li0.24Mn0.76O2				4.5	2
555	The role of covalent bonding and anionic redox for the performance of sodium cobaltate electrode materials	2021	Energy Storage Materials	10.1016/j.ensm.2021.02.008	Mechanism	Composition	LiCoO2						70	carbon black	20	PVDF	10
556	The role of covalent bonding and anionic redox for the performance of sodium cobaltate electrode materials	2021	Energy Storage Materials	10.1016/j.ensm.2021.02.008	Mechanism	Composition	LiNi0.5Co0.5O2				4.3	2.5	70	carbon black	20	PVDF	10
557	The role of covalent bonding and anionic redox for the performance of sodium cobaltate electrode materials	2021	Energy Storage Materials	10.1016/j.ensm.2021.02.008	Mechanism	Composition	Li-richLi(NiMnCo)O2				4.8	2	70	carbon black	20	PVDF	10
558	The role of covalent bonding and anionic redox for the performance of sodium cobaltate electrode materials	2021	Energy Storage Materials	10.1016/j.ensm.2021.02.008	Mechanism	Composition	NaCoO2	crystalline		thin-film	3.8		70	carbon black	20	PVDF	10
559	The role of covalent bonding and anionic redox for the performance of sodium cobaltate electrode materials	2021	Energy Storage Materials	10.1016/j.ensm.2021.02.008	Mechanism	Composition	LiNiO2				4.3	2.5	70	carbon black	20	PVDF	10
560	On the use of guanidine hydrochloride soft template in the synthesis of Na2/3Ni1/3Mn2/3O2 cathodes for sodium-ion batteries	2019	Journal of Alloys and Compounds	10.1016/j.jallcom.2019.03.093	Cyclability	Morphology	Na0.5Ni0.33Mn0.67O2	P2		plate-like	4	2	80	carbon black	10	PVDF (polyvinylidene fluoride)	10
561	On the use of guanidine hydrochloride soft template in the synthesis of Na2/3Ni1/3Mn2/3O2 cathodes for sodium-ion batteries	2019	Journal of Alloys and Compounds	10.1016/j.jallcom.2019.03.093	Cyclability	Morphology	Na0.66Ni0.33Mn0.67O2	P2		plate-like	4	2	80	carbon black	10	PVDF (polyvinylidene fluoride)	10
562	On the use of guanidine hydrochloride soft template in the synthesis of Na2/3Ni1/3Mn2/3O2 cathodes for sodium-ion batteries	2019	Journal of Alloys and Compounds	10.1016/j.jallcom.2019.03.093	Cyclability	Morphology	Na0.66(Mn0.54Co0.13Ni0.13)O2	P2		plate-like	4	2	80	carbon black	10	PVDF (polyvinylidene fluoride)	10
563	On the use of guanidine hydrochloride soft template in the synthesis of Na2/3Ni1/3Mn2/3O2 cathodes for sodium-ion batteries	2019	Journal of Alloys and Compounds	10.1016/j.jallcom.2019.03.093	Cyclability	Morphology	Na2/3Ni1/3Mn2/3O2	P2		plates			80	carbon black	10	PVDF (polyvinylidene fluoride)	10
564	Thermal Expansion in Layered Na x MO2	2018	Scientific Reports	10.1038/s41598-018-22279-9	Mechanism	Crystal	NaFe0.5Co0.5O2	O3			4	2	70	carbon black	20	polyvinylidene fluoride (PVDF)	10
565	Thermal Expansion in Layered Na x MO2	2018	Scientific Reports	10.1038/s41598-018-22279-9	Mechanism	Crystal	Na0.71CoO2				4	2	70	carbon black	20	polyvinylidene fluoride (PVDF)	10
566	Thermal Expansion in Layered Na x MO2	2018	Scientific Reports	10.1038/s41598-018-22279-9	Mechanism	Crystal	Na0.6MnO2	P2			4	2	70	carbon black	20	polyvinylidene fluoride (PVDF)	10
567	Thermal Expansion in Layered Na x MO2	2018	Scientific Reports	10.1038/s41598-018-22279-9	Mechanism	Crystal	NaNi1/3Co1/3Fe1/3O2	O3			4	2	70	carbon black	20	polyvinylidene fluoride (PVDF)	10
568	Thermal Expansion in Layered Na x MO2	2018	Scientific Reports	10.1038/s41598-018-22279-9	Mechanism	Crystal	Na2/3Ni1/3Mn2/3O2				4	2	70	carbon black	20	polyvinylidene fluoride (PVDF)	10
569	Water-processable P2-Na0.67Ni0.22Cu0.11Mn0.56Ti0.11O2 cathode material for sodium ion batteries	2019	Journal of the Electrochemical Society	10.1149/2.0881902jes	Cyclability	Composition	Na0.67Ni0.22Cu0.11Mn0.56Ti0.11O2	P2		plates	4.5	2.5	90	acetylene carbon	5	polyvinylidene fluoride or sodium alginate	5
570	Water-processable P2-Na0.67Ni0.22Cu0.11Mn0.56Ti0.11O2 cathode material for sodium ion batteries	2019	Journal of the Electrochemical Society	10.1149/2.0881902jes	Cyclability	Composition	Na0.67Mn0.9Mg0.1O2				4.5	1	90	acetylene carbon	5	polyvinylidene fluoride or sodium alginate	5
571	Water-processable P2-Na0.67Ni0.22Cu0.11Mn0.56Ti0.11O2 cathode material for sodium ion batteries	2019	Journal of the Electrochemical Society	10.1149/2.0881902jes	Cyclability	Composition	Na0.67Mn0.5Fe0.5O2				4.5	2.5	90	acetylene carbon	5	polyvinylidene fluoride or sodium alginate	5
572	Water-processable P2-Na0.67Ni0.22Cu0.11Mn0.56Ti0.11O2 cathode material for sodium ion batteries	2019	Journal of the Electrochemical Society	10.1149/2.0881902jes	Cyclability	Composition	Na7/9Cu2/9Fe1/9Mn2/3O2				4.5	2.5	90	acetylene carbon	5	polyvinylidene fluoride or sodium alginate	5
573	Water-processable P2-Na0.67Ni0.22Cu0.11Mn0.56Ti0.11O2 cathode material for sodium ion batteries	2019	Journal of the Electrochemical Society	10.1149/2.0881902jes	Cyclability	Composition	Na0.67Mn0.67Ni0.33O2	P2			4.5	2.5	90	acetylene carbon	5	polyvinylidene fluoride or sodium alginate	5
574	Insights into the Improved High-Voltage Performance of Li-Incorporated Layered Oxide Cathodes for Sodium-Ion Batteries	2018	Chem	10.1016/j.chempr.2018.05.018	Cyclability	Doping	NaNi0.5Mn0.5O2	O3			4.5	2	70	carbon black	20	PVDF	10
575	Insights into the Improved High-Voltage Performance of Li-Incorporated Layered Oxide Cathodes for Sodium-Ion Batteries	2018	Chem	10.1016/j.chempr.2018.05.018	Cyclability	Doping	Na(NiCoFeTi)1/4O2	O3			4.5	2	70	carbon black	20	PVDF	10
576	Insights into the Improved High-Voltage Performance of Li-Incorporated Layered Oxide Cathodes for Sodium-Ion Batteries	2018	Chem	10.1016/j.chempr.2018.05.018	Cyclability	Doping	NaLi0.1Ni0.35Mn0.55O2	O3			4.5	2	70	carbon black	20	PVDF	10
577	Insights into the Improved High-Voltage Performance of Li-Incorporated Layered Oxide Cathodes for Sodium-Ion Batteries	2018	Chem	10.1016/j.chempr.2018.05.018	Cyclability	Doping	Na2/3Ni1/3Mn2/3O2		Al2O3		4.5	2	70	carbon black	20	PVDF	10
578	Stabilizing P3-Type Oxides as Cathodes for High-Rate and Long-Life Sodium Ion Batteries by Disordered Distribution of Transition Metals	2020	Small Methods	10.1002/smtd.202000422	Cyclability	Composition	Na0.6Cr0.6Ti0.4O2	R3m			4.1	2	80	carbon black	10	polyvinylidene difluoride (PVdF)	10
579	Stabilizing P3-Type Oxides as Cathodes for High-Rate and Long-Life Sodium Ion Batteries by Disordered Distribution of Transition Metals	2020	Small Methods	10.1002/smtd.202000422	Cyclability	Composition	Na2/3Ni1/3Mn2/3O2	P3			4.1	2	80	carbon black	10	polyvinylidene difluoride (PVdF)	10
580	Stabilizing P3-Type Oxides as Cathodes for High-Rate and Long-Life Sodium Ion Batteries by Disordered Distribution of Transition Metals	2020	Small Methods	10.1002/smtd.202000422	Cyclability	Composition	Na0.67Mn0.67Ni0.33O2	R3m		homogeneous	4.1	2	80	carbon black	10	polyvinylidene difluoride (PVdF)	10
581	Stabilizing P3-Type Oxides as Cathodes for High-Rate and Long-Life Sodium Ion Batteries by Disordered Distribution of Transition Metals	2020	Small Methods	10.1002/smtd.202000422	Cyclability	Composition	Na0.44Co0.22Mn0.22O2	R3m		homogeneous	4.1	2	80	carbon black	10	polyvinylidene difluoride (PVdF)	10
582	Stabilizing P3-Type Oxides as Cathodes for High-Rate and Long-Life Sodium Ion Batteries by Disordered Distribution of Transition Metals	2020	Small Methods	10.1002/smtd.202000422	Cyclability	Composition	Na0.67Fe0.5Mn0.5O2	R3m		homogeneous	4.1	2	80	carbon black	10	polyvinylidene difluoride (PVdF)	10
583	INVESTIGATING THE PERFORMANCE OF FULL-CELL USING NaFe0.45 Cu0.05 Co0.5O2 CATHODE AND HARD CARBON ANODE	2022	Vietnam Journal of Science and Technology	10.15625/2525-2518/16040	Capacity	Composition	Na0.67Mn0.8Cu0.1Mg0.1O2	hexagonal		irregular	4.2	2	80	conducting carbon C65	15	poly(vinylidene fluoride-co-hexafluoropropylene) (PVDF-HFP)	5
584	INVESTIGATING THE PERFORMANCE OF FULL-CELL USING NaFe0.45 Cu0.05 Co0.5O2 CATHODE AND HARD CARBON ANODE	2022	Vietnam Journal of Science and Technology	10.15625/2525-2518/16040	Capacity	Composition	NaCu0.05Fe0.45Co0.5O2	O3		irregular	3.4	3.2	80	conducting carbon C65	15	poly(vinylidene fluoride-co-hexafluoropropylene) (PVDF-HFP)	5
585	INVESTIGATING THE PERFORMANCE OF FULL-CELL USING NaFe0.45 Cu0.05 Co0.5O2 CATHODE AND HARD CARBON ANODE	2022	Vietnam Journal of Science and Technology	10.15625/2525-2518/16040	Capacity	Composition	NaNi1/3Fe1/3Mn1/3O2	O3		irregular	4	2	80	conducting carbon C65	15	poly(vinylidene fluoride-co-hexafluoropropylene) (PVDF-HFP)	5
586	INVESTIGATING THE PERFORMANCE OF FULL-CELL USING NaFe0.45 Cu0.05 Co0.5O2 CATHODE AND HARD CARBON ANODE	2022	Vietnam Journal of Science and Technology	10.15625/2525-2518/16040	Capacity	Composition	NaFe0.5Co0.5O2			polygonal	3.4	3.2	80	conducting carbon C65	15	poly(vinylidene fluoride-co-hexafluoropropylene) (PVDF-HFP)	5
587	Preparation of intergrown P/O-type biphasic layered oxides as high-performance cathodes for sodium ion batteries	2021	Journal of Materials Chemistry A	10.1039/d1ta00627d	Cyclability	Composition	Na0.8Mn0.55Ni0.25Fe0.1Ti0.1O2	P2/O3		plate-like	4.3	1.5	80	Super P	10	polyvinylidene fluoride (PVDF)	10
588	Preparation of intergrown P/O-type biphasic layered oxides as high-performance cathodes for sodium ion batteries	2021	Journal of Materials Chemistry A	10.1039/d1ta00627d	Cyclability	Composition	Na0.6Li0.6Mn0.72Ni0.18Co0.10O2	P2			4.3	1.5	80	Super P	10	polyvinylidene fluoride (PVDF)	10
589	A Co- and Ni-Free P2/O3 Biphasic Lithium Stabilized Layered Oxide for Sodium-Ion Batteries and its Cycling Behavior	2020	Advanced Functional Materials	10.1002/adfm.202003364	Cyclability	Composition	Na2/3Fe0.5Mn0.5O2	P2/O3		plate-like	3.8		94
590	A Co- and Ni-Free P2/O3 Biphasic Lithium Stabilized Layered Oxide for Sodium-Ion Batteries and its Cycling Behavior	2020	Advanced Functional Materials	10.1002/adfm.202003364	Cyclability	Composition	Na0.66Li0.18Fe0.12Mn0.7O2	hexagonal		agglomerates	4.6	2	94
591	A Co- and Ni-Free P2/O3 Biphasic Lithium Stabilized Layered Oxide for Sodium-Ion Batteries and its Cycling Behavior	2020	Advanced Functional Materials	10.1002/adfm.202003364	Cyclability	Composition	Na0.66Li0.18Mn0.71Ni0.21Co0.08O2	P2/O3		plate-like	4.5	1.5	94
592	A Co- and Ni-Free P2/O3 Biphasic Lithium Stabilized Layered Oxide for Sodium-Ion Batteries and its Cycling Behavior	2020	Advanced Functional Materials	10.1002/adfm.202003364	Cyclability	Composition	Na0.76Mn0.5Ni0.3Fe0.1Mg0.1O2	P2/O3		agglomerates	4.3	2	94
593	A Co- and Ni-Free P2/O3 Biphasic Lithium Stabilized Layered Oxide for Sodium-Ion Batteries and its Cycling Behavior	2020	Advanced Functional Materials	10.1002/adfm.202003364	Cyclability	Composition	Na2/3Li0.18Fe0.2Mn0.8O2	P2/O3		agglomerates	4.2	1.5	94
594	Sodium storage property and mechanism of NaCr1/4Fe1/4Ni1/4Ti1/4O2 cathode at various cut-off voltages	2020	Energy Storage Materials	10.1016/j.ensm.2019.07.022	Mechanism	Composition	NaNi1/3Mn1/3Co1/3O2	O3			3.4	1.5	70	acetylene black	20	polyvinylidene fluoride (PVDF)	10
595	Sodium storage property and mechanism of NaCr1/4Fe1/4Ni1/4Ti1/4O2 cathode at various cut-off voltages	2020	Energy Storage Materials	10.1016/j.ensm.2019.07.022	Mechanism	Composition	NaNi1/3Co1/3Fe1/3O2	O3		particle	4.1	1.5	70	acetylene black	20	polyvinylidene fluoride (PVDF)	10
596	Sodium storage property and mechanism of NaCr1/4Fe1/4Ni1/4Ti1/4O2 cathode at various cut-off voltages	2020	Energy Storage Materials	10.1016/j.ensm.2019.07.022	Mechanism	Composition	NaNi1/3Fe1/3Mn1/3O2	O3			4.1	1.5	70	acetylene black	20	polyvinylidene fluoride (PVDF)	10
597	Sodium storage property and mechanism of NaCr1/4Fe1/4Ni1/4Ti1/4O2 cathode at various cut-off voltages	2020	Energy Storage Materials	10.1016/j.ensm.2019.07.022	Mechanism	Composition	Na(Mn0.25Fe0.25Co0.25Ni0.25)O2	O3			4.1	1.5	70	acetylene black	20	polyvinylidene fluoride (PVDF)	10
598	Electrochemical Properties of Layered NaxNix/2Mn1−x/2O2 (0.5 ≤ x ≤ 1.1) with P3 Structure as Cathode for Sodium-Ion Batteries	2022	Energy Technology	10.1002/ente.202101121	Capacity	Composition	Na0.5Ni0.25Mn0.75O2	P3			4	1.5	80	carbon black	10	polyvinylidene fluoride (PVDF)	10
599	Electrochemical Properties of Layered NaxNix/2Mn1−x/2O2 (0.5 ≤ x ≤ 1.1) with P3 Structure as Cathode for Sodium-Ion Batteries	2022	Energy Technology	10.1002/ente.202101121	Capacity	Composition	Na0.6Ni0.3Mn0.7O2	P3			4	1.5	80	carbon black	10	polyvinylidene fluoride (PVDF)	10
600	Electrochemical Properties of Layered NaxNix/2Mn1−x/2O2 (0.5 ≤ x ≤ 1.1) with P3 Structure as Cathode for Sodium-Ion Batteries	2022	Energy Technology	10.1002/ente.202101121	Capacity	Composition	Na0.7Ni0.35Mn0.65O2	P2			4.5	2.2	80	carbon black	10	polyvinylidene fluoride (PVDF)	10
601	Electrochemical Properties of Layered NaxNix/2Mn1−x/2O2 (0.5 ≤ x ≤ 1.1) with P3 Structure as Cathode for Sodium-Ion Batteries	2022	Energy Technology	10.1002/ente.202101121	Capacity	Composition	Na0.8Ni0.4Mn0.6O2	P3			4.5	2.2	80	carbon black	10	polyvinylidene fluoride (PVDF)	10
602	Electrochemical Properties of Layered NaxNix/2Mn1−x/2O2 (0.5 ≤ x ≤ 1.1) with P3 Structure as Cathode for Sodium-Ion Batteries	2022	Energy Technology	10.1002/ente.202101121	Capacity	Composition	Na0.9Ni0.45Mn0.55O2	P3			4.5	2.2	80	carbon black	10	polyvinylidene fluoride (PVDF)	10
603	Unraveling the Roles of La Substitution for Different Transition Metals on P2-Na0.67Mn0.6Ni0.2Co0.2O2Cathode Materials	2020	Journal of the Electrochemical Society	10.1149/1945-7111/abca70	Cyclability	Doping	Na0.67Mn0.6Ni0.2Co0.2O2			plate-like	4.2	1.5	75	super P conductive carbon	15	poly(vinylidene fluoride) (PVDF)	10
604	Unraveling the Roles of La Substitution for Different Transition Metals on P2-Na0.67Mn0.6Ni0.2Co0.2O2Cathode Materials	2020	Journal of the Electrochemical Society	10.1149/1945-7111/abca70	Cyclability	Doping	Na0.67Mn0.57La0.03Ni0.2Co0.2O2			plate-like	4.2	1.5	75	super P conductive carbon	15	poly(vinylidene fluoride) (PVDF)	10
605	Unraveling the Roles of La Substitution for Different Transition Metals on P2-Na0.67Mn0.6Ni0.2Co0.2O2Cathode Materials	2020	Journal of the Electrochemical Society	10.1149/1945-7111/abca70	Cyclability	Doping	Na0.67Mn0.6Ni0.17La0.03Co0.2O2			plate-like	4.2	1.5	75	super P conductive carbon	15	poly(vinylidene fluoride) (PVDF)	10
606	Unraveling the Roles of La Substitution for Different Transition Metals on P2-Na0.67Mn0.6Ni0.2Co0.2O2Cathode Materials	2020	Journal of the Electrochemical Society	10.1149/1945-7111/abca70	Cyclability	Doping	Na0.67Mn0.6Ni0.2Co0.17La0.03O2	P2		plate-like	4.2	1.5	75	super P conductive carbon	15	poly(vinylidene fluoride) (PVDF)	10
607	Unraveling the Roles of La Substitution for Different Transition Metals on P2-Na0.67Mn0.6Ni0.2Co0.2O2Cathode Materials	2020	Journal of the Electrochemical Society	10.1149/1945-7111/abca70	Cyclability	Doping	Na0.67Mn0.59La0.01Ni0.19La0.01Co0.19La0.01O2	P2		plate-like	4.2	1.5	75	super P conductive carbon	15	poly(vinylidene fluoride) (PVDF)	10
608	Evaluation of electrochemical performance and redox activity of Fe in Ti doped layered P2-Na0.67Mn0.5Fe0.5O2 cathode for sodium ion batteries	2021	Electrochimica Acta	10.1016/j.electacta.2021.138156	Cyclability	Doping	NaFe0.5Mn0.5O2	hexagonal			4.2	1.5	70
609	Evaluation of electrochemical performance and redox activity of Fe in Ti doped layered P2-Na0.67Mn0.5Fe0.5O2 cathode for sodium ion batteries	2021	Electrochimica Acta	10.1016/j.electacta.2021.138156	Cyclability	Doping	Na0.78Ni0.23Mn0.69O2				4.2	1.5	70
610	Evaluation of electrochemical performance and redox activity of Fe in Ti doped layered P2-Na0.67Mn0.5Fe0.5O2 cathode for sodium ion batteries	2021	Electrochimica Acta	10.1016/j.electacta.2021.138156	Cyclability	Doping	Na0.67Fe0.5Mn0.5O2	hexagonal			4.2	1.5	70
611	Structural and Thermodynamic Understandings in Mn-Based Sodium Layered Oxides during Anionic Redox	2020	Advanced Science	10.1002/advs.202001263	Mechanism	Composition	Na0.78Ni0.23Mn0.69O2	P2			4.4	1.5	70	SuperP	20	polyvinylidene fluoride	10
612	Structural and Thermodynamic Understandings in Mn-Based Sodium Layered Oxides during Anionic Redox	2020	Advanced Science	10.1002/advs.202001263	Mechanism	Composition	NaLi1/3Mn2/3O2	P2			4.4	1.5	70	SuperP	20	polyvinylidene fluoride	10
613	Structural and Thermodynamic Understandings in Mn-Based Sodium Layered Oxides during Anionic Redox	2020	Advanced Science	10.1002/advs.202001263	Mechanism	Composition	Na0.76Li0.25Mn0.75O2	P2			4.4	1.5	70	SuperP	20	polyvinylidene fluoride	10
614	Structural and Thermodynamic Understandings in Mn-Based Sodium Layered Oxides during Anionic Redox	2020	Advanced Science	10.1002/advs.202001263	Mechanism	Composition	Na2/3Mg0.28Mn0.72O2	P2			4.4	1.5	70	SuperP	20	polyvinylidene fluoride	10
615	Structural and Thermodynamic Understandings in Mn-Based Sodium Layered Oxides during Anionic Redox	2020	Advanced Science	10.1002/advs.202001263	Mechanism	Composition	Na0.6Li0.2Mn0.8O2	P2			4.4	1.5	70	SuperP	20	polyvinylidene fluoride	10
616	An Ordered P2/P3 Composite Layered Oxide Cathode with Long Cycle Life in Sodium-Ion Batteries	2019	ACS Materials Letters	10.1021/acsmaterialslett.9b00347	Cyclability	Composition	Na2/3Ni1/3Mn7/12Fe1/12O2			platelike	4	2	80	carbon black	15	poly(vinylidene difluoride) (PVDF)	5
617	An Ordered P2/P3 Composite Layered Oxide Cathode with Long Cycle Life in Sodium-Ion Batteries	2019	ACS Materials Letters	10.1021/acsmaterialslett.9b00347	Cyclability	Composition	Na0.67Mn0.65Fe0.2Ni0.15O2			platelike	4.2	2	80	carbon black	15	poly(vinylidene difluoride) (PVDF)	5
618	An Ordered P2/P3 Composite Layered Oxide Cathode with Long Cycle Life in Sodium-Ion Batteries	2019	ACS Materials Letters	10.1021/acsmaterialslett.9b00347	Cyclability	Composition	Na3RuO4			platelike	4	2	80	carbon black	15	poly(vinylidene difluoride) (PVDF)	5
619	An Ordered P2/P3 Composite Layered Oxide Cathode with Long Cycle Life in Sodium-Ion Batteries	2019	ACS Materials Letters	10.1021/acsmaterialslett.9b00347	Cyclability	Composition	Na0.75Co0.125Cu0.125Fe0.125Ni0.125Mn0.5O2	P2	P3		4.2		80	carbon black	15	poly(vinylidene difluoride) (PVDF)	5
620	An Ordered P2/P3 Composite Layered Oxide Cathode with Long Cycle Life in Sodium-Ion Batteries	2019	ACS Materials Letters	10.1021/acsmaterialslett.9b00347	Cyclability	Composition	Na-Ni0.32Fe0.13Co0.15Mn0.40O2			platelike	4.2		80	carbon black	15	poly(vinylidene difluoride) (PVDF)	5
621	Engineering Na+-layer spacings to stabilize Mn-based layered cathodes for sodium-ion batteries	2021	Nature Communications	10.1038/s41467-021-25074-9	Cyclability	Morphology	Na0.67MnO2	P2	NaHCO3	irregular	4	2	80	acetylene carbon black	10	polyvinylidene fluoride	10
622	Engineering Na+-layer spacings to stabilize Mn-based layered cathodes for sodium-ion batteries	2021	Nature Communications	10.1038/s41467-021-25074-9	Cyclability	Morphology	Na-Fe-Mn-O	P2	NaHCO3	nanoflakes	4.4	2	80	acetylene carbon black	10	polyvinylidene fluoride	10
623	Engineering Na+-layer spacings to stabilize Mn-based layered cathodes for sodium-ion batteries	2021	Nature Communications	10.1038/s41467-021-25074-9	Cyclability	Morphology	Na0.67MnO2(S-NMO)	hexagonal		nanoflakes	4	2	80	acetylene carbon black	10	polyvinylidene fluoride	10
624	Dynamic structural evolution and controllable redox potential for abnormal high-voltage sodium layered oxide cathodes	2021	Cell Reports Physical Science	10.1016/j.xcrp.2021.100631	Mechanism	Composition	Na0.9Ni0.45Mn0.55O2				4.05	2.4
625	Dynamic structural evolution and controllable redox potential for abnormal high-voltage sodium layered oxide cathodes	2021	Cell Reports Physical Science	10.1016/j.xcrp.2021.100631	Mechanism	Composition	Na0.75Ni0.2Co0.2Mn0.6O2				4.05	2.4
626	Dynamic structural evolution and controllable redox potential for abnormal high-voltage sodium layered oxide cathodes	2021	Cell Reports Physical Science	10.1016/j.xcrp.2021.100631	Mechanism	Composition	Na0.67Ni0.33Mn0.67O2				4.05	2.4
627	Unblocking Oxygen Charge Compensation for Stabilized High-Voltage Structure in P2-Type Sodium-Ion Cathode	2022	Advanced Science	10.1002/advs.202200498	Cyclability	Doping	Na2/3Ni1/3Mn2/3O2	hexagonal		brick-like	4.19	2
628	Unblocking Oxygen Charge Compensation for Stabilized High-Voltage Structure in P2-Type Sodium-Ion Cathode	2022	Advanced Science	10.1002/advs.202200498	Cyclability	Doping	NaNi0.5Mn0.5O2	hexagonal		brick-like	4.19	2
629	Unblocking Oxygen Charge Compensation for Stabilized High-Voltage Structure in P2-Type Sodium-Ion Cathode	2022	Advanced Science	10.1002/advs.202200498	Cyclability	Doping	NaFeO2	orthorhombic			4.4
630	Unblocking Oxygen Charge Compensation for Stabilized High-Voltage Structure in P2-Type Sodium-Ion Cathode	2022	Advanced Science	10.1002/advs.202200498	Cyclability	Doping	NaCrO2	hexagonal		brick-like	4.19	2
631	Unblocking Oxygen Charge Compensation for Stabilized High-Voltage Structure in P2-Type Sodium-Ion Cathode	2022	Advanced Science	10.1002/advs.202200498	Cyclability	Doping	NaV3O8	orthorhombic			4.2	3.9
632	High Reversibility of Lattice Oxygen Redox Quantified by Direct Bulk Probes of Both Anionic and Cationic Redox Reactions	2019	Joule	10.1016/j.joule.2018.11.014	Cyclability	Composition	Na2/3Mg1/3Mn2/3O2	P2		smooth-faced	4.2	2.5	80	acetylene black	10	polyvinylidene fluoride	10
633	High Reversibility of Lattice Oxygen Redox Quantified by Direct Bulk Probes of Both Anionic and Cationic Redox Reactions	2019	Joule	10.1016/j.joule.2018.11.014	Cyclability	Composition	Na0.44MnO2				4.2	2	80	acetylene black	10	polyvinylidene fluoride	10
634	High Reversibility of Lattice Oxygen Redox Quantified by Direct Bulk Probes of Both Anionic and Cationic Redox Reactions	2019	Joule	10.1016/j.joule.2018.11.014	Cyclability	Composition	Na0.67Mg0.28Mn0.72O2	P2		smooth-faced	4.2	2.5	80	acetylene black	10	polyvinylidene fluoride	10
635	High Reversibility of Lattice Oxygen Redox Quantified by Direct Bulk Probes of Both Anionic and Cationic Redox Reactions	2019	Joule	10.1016/j.joule.2018.11.014	Cyclability	Composition	Na2/3Ni1/3Mn2/3O2				4.2	2.5	80	acetylene black	10	polyvinylidene fluoride	10
636	High Reversibility of Lattice Oxygen Redox Quantified by Direct Bulk Probes of Both Anionic and Cationic Redox Reactions	2019	Joule	10.1016/j.joule.2018.11.014	Cyclability	Composition	Na0.67Fe0.5Mn0.5O2	P2			4.2	2	80	acetylene black	10	polyvinylidene fluoride	10
637	Mitigation of Jahn-Teller distortion and Na+/vacancy ordering in a distorted manganese oxide cathode material by Li substitution	2021	Chemical Science	10.1039/d0sc05427e	Cyclability	Doping	Na0.67MnO2	P02			4.3	1.8				poly(vinyl di fluoride) (PVDF)
638	Mitigation of Jahn-Teller distortion and Na+/vacancy ordering in a distorted manganese oxide cathode material by Li substitution	2021	Chemical Science	10.1039/d0sc05427e	Cyclability	Doping	P02-Na0.67Li0.05Mn0.95O2	orthorhombic			4.3	1.8				poly(vinyl di fluoride) (PVDF)
639	Mitigation of Jahn-Teller distortion and Na+/vacancy ordering in a distorted manganese oxide cathode material by Li substitution	2021	Chemical Science	10.1039/d0sc05427e	Cyclability	Doping	P02-Na0.67Mn0.78Fe0.220.9Ti0.1O2	P02			4.3	1.8				poly(vinyl di fluoride) (PVDF)
640	Mitigation of Jahn-Teller distortion and Na+/vacancy ordering in a distorted manganese oxide cathode material by Li substitution	2021	Chemical Science	10.1039/d0sc05427e	Cyclability	Doping	Na0.67Mn0.9Mg0.1O2	P02			4.3	1.8				poly(vinyl di fluoride) (PVDF)
641	Mitigation of Jahn-Teller distortion and Na+/vacancy ordering in a distorted manganese oxide cathode material by Li substitution	2021	Chemical Science	10.1039/d0sc05427e	Cyclability	Doping	Na0.67Mn0.9Al0.1O2	P2			3.6	2.1				poly(vinyl di fluoride) (PVDF)
642	Understanding the Air-Exposure Degradation Chemistry at a Nanoscale of Layered Oxide Cathodes for Sodium-Ion Batteries	2019	Nano Letters	10.1021/acs.nanolett.8b03637	Air stability	Coating	NaNi0.61Co0.12Mn0.27O2				3.9	1.5	70			PVDF	30
643	Understanding the Air-Exposure Degradation Chemistry at a Nanoscale of Layered Oxide Cathodes for Sodium-Ion Batteries	2019	Nano Letters	10.1021/acs.nanolett.8b03637	Air stability	Coating	NaNi0.5Mn0.5O2	hexagonal		spherical	4	2	70			PVDF	30
644	Understanding the Air-Exposure Degradation Chemistry at a Nanoscale of Layered Oxide Cathodes for Sodium-Ion Batteries	2019	Nano Letters	10.1021/acs.nanolett.8b03637	Air stability	Coating	NaNi1/3Mn1/3Co1/3O2	hexagonal	NiO	spherical	4	2	70			PVDF	30
645	Understanding the Air-Exposure Degradation Chemistry at a Nanoscale of Layered Oxide Cathodes for Sodium-Ion Batteries	2019	Nano Letters	10.1021/acs.nanolett.8b03637	Air stability	Coating	Na0.67Mn0.5Fe0.5O2	P2			4.2	1.5	70			PVDF	30
646	Understanding the Air-Exposure Degradation Chemistry at a Nanoscale of Layered Oxide Cathodes for Sodium-Ion Batteries	2019	Nano Letters	10.1021/acs.nanolett.8b03637	Air stability	Coating	Na0.7Mn0.15Co0.15O2	hexagonal			3.9	1.5	70			PVDF	30
647	Al-substituted stable-layered P2-Na0.6Li0.15Al0.15Mn0.7O2 cathode for sodium ion batteries	2021	International Journal of Energy Research	10.1002/er.6606	Cyclability	Doping	Na0.75Ni1/3Ru1/6Mn1/2O2	P2		flake-like	4	1.5	80	acetylene black	10	poly-vinylidene fluoride (PVDF)	10
648	Al-substituted stable-layered P2-Na0.6Li0.15Al0.15Mn0.7O2 cathode for sodium ion batteries	2021	International Journal of Energy Research	10.1002/er.6606	Cyclability	Doping	Na2/3Ni1/3Mn2/3O2	P2		flake-like	4.5	2	80	acetylene black	10	poly-vinylidene fluoride (PVDF)	10
649	Al-substituted stable-layered P2-Na0.6Li0.15Al0.15Mn0.7O2 cathode for sodium ion batteries	2021	International Journal of Energy Research	10.1002/er.6606	Cyclability	Doping	Na0.5Ni0.25Mn0.75O2	P2		flake-like	4	2	80	acetylene black	10	poly-vinylidene fluoride (PVDF)	10
650	Al-substituted stable-layered P2-Na0.6Li0.15Al0.15Mn0.7O2 cathode for sodium ion batteries	2021	International Journal of Energy Research	10.1002/er.6606	Cyclability	Doping	Na0.44MnO2	P2		flake-like	4	2	80	acetylene black	10	poly-vinylidene fluoride (PVDF)	10
651	Al-substituted stable-layered P2-Na0.6Li0.15Al0.15Mn0.7O2 cathode for sodium ion batteries	2021	International Journal of Energy Research	10.1002/er.6606	Cyclability	Doping	Na0.66Li0.18Fe0.12Mn0.7O2	P2		flake-like	4.3	2	80	acetylene black	10	poly-vinylidene fluoride (PVDF)	10
652	Revisiting the Na2/3Ni1/3Mn2/3O2 Cathode: Oxygen Redox Chemistry and Oxygen Release Suppression	2020	ACS Central Science	10.1021/acscentsci.9b01166	Mechanism	Doping	Na2/3Ni1/3Mn2/3O2	hexagonal		hexagonal	4.3	2.2	70	carbon black	20	PVDF	10
653	Revisiting the Na2/3Ni1/3Mn2/3O2 Cathode: Oxygen Redox Chemistry and Oxygen Release Suppression	2020	ACS Central Science	10.1021/acscentsci.9b01166	Mechanism	Doping	Na0.78Ni0.23Mn0.69O2				4.3	2.2	70	carbon black	20	PVDF	10
654	Revisiting the Na2/3Ni1/3Mn2/3O2 Cathode: Oxygen Redox Chemistry and Oxygen Release Suppression	2020	ACS Central Science	10.1021/acscentsci.9b01166	Mechanism	Doping	Na0.67Ni0.26Zn0.07Mn0.67O2				4.3	2.2	70	carbon black	20	PVDF	10
655	Revisiting the Na2/3Ni1/3Mn2/3O2 Cathode: Oxygen Redox Chemistry and Oxygen Release Suppression	2020	ACS Central Science	10.1021/acscentsci.9b01166	Mechanism	Doping	Na0.5Ni0.33Mn0.67O2				4.3	2.2	70	carbon black	20	PVDF	10
656	Al and Fe-containing Mn-based layered cathode with controlled vacancies for high-rate sodium ion batteries	2020	Nano Energy	10.1016/j.nanoen.2020.104997	Capacity	Doping	Na0.67Mn0.8Cu0.1Mg0.1O2				4	2	80	acetylene black	10	polyvinylidene fluoride	10
657	Al and Fe-containing Mn-based layered cathode with controlled vacancies for high-rate sodium ion batteries	2020	Nano Energy	10.1016/j.nanoen.2020.104997	Capacity	Doping	Na0.67MnO2	orthorhombic			4	2	80	acetylene black	10	polyvinylidene fluoride	10
658	Al and Fe-containing Mn-based layered cathode with controlled vacancies for high-rate sodium ion batteries	2020	Nano Energy	10.1016/j.nanoen.2020.104997	Capacity	Doping	Na2/3-zMn1/2Fe1/2O2				4	2	80	acetylene black	10	polyvinylidene fluoride	10
659	Controlling Surface Phase Transition and Chemical Reactivity of O3-Layered Metal Oxide Cathodes for High-Performance Na-Ion Batteries	2020	ACS Energy Letters	10.1021/acsenergylett.0c00700	Cyclability	Coating	NaNi0.68Mn0.22Co0.10O2	O3			4.2	2	55
660	Controlling Surface Phase Transition and Chemical Reactivity of O3-Layered Metal Oxide Cathodes for High-Performance Na-Ion Batteries	2020	ACS Energy Letters	10.1021/acsenergylett.0c00700	Cyclability	Coating	NaNi0.5Mn0.5O2				4.2	2	55
661	Controlling Surface Phase Transition and Chemical Reactivity of O3-Layered Metal Oxide Cathodes for High-Performance Na-Ion Batteries	2020	ACS Energy Letters	10.1021/acsenergylett.0c00700	Cyclability	Coating	NaNi0.6Co0.05Mn0.35O2	O3	MgO		4.2	2	55
662	Controlling Surface Phase Transition and Chemical Reactivity of O3-Layered Metal Oxide Cathodes for High-Performance Na-Ion Batteries	2020	ACS Energy Letters	10.1021/acsenergylett.0c00700	Cyclability	Coating	NaNi0.68Mn0.22Co0.10O2	O3			4.2	2	55
663	Controlling Surface Phase Transition and Chemical Reactivity of O3-Layered Metal Oxide Cathodes for High-Performance Na-Ion Batteries	2020	ACS Energy Letters	10.1021/acsenergylett.0c00700	Cyclability	Coating	NaNi0.6Co0.05Mn0.35O2	O3	MgO		4.2	2	55
664	Empowering multicomponent cathode materials for sodium ion batteries by exploring three-dimensional compositional heterogeneities	2018	Energy and Environmental Science	10.1039/c8ee00309b	Cyclability	Composition	Na0.9Cu0.2Fe0.28Mn0.52O2				3.8	2	80	carbon black	15	polyvinylidene fluoride (PVDF)	5
665	Empowering multicomponent cathode materials for sodium ion batteries by exploring three-dimensional compositional heterogeneities	2018	Energy and Environmental Science	10.1039/c8ee00309b	Cyclability	Composition	NaNi1/3Fe1/3Mn1/3O2				4	2	80	carbon black	15	polyvinylidene fluoride (PVDF)	5
666	Empowering multicomponent cathode materials for sodium ion batteries by exploring three-dimensional compositional heterogeneities	2018	Energy and Environmental Science	10.1039/c8ee00309b	Cyclability	Composition	LiNi0.5Co0.5O2				4.3	2.5	80	carbon black	15	polyvinylidene fluoride (PVDF)	5
667	Empowering multicomponent cathode materials for sodium ion batteries by exploring three-dimensional compositional heterogeneities	2018	Energy and Environmental Science	10.1039/c8ee00309b	Cyclability	Composition	NaNi1/3Fe1/3Mn1/3O2				4	2	80	carbon black	15	polyvinylidene fluoride (PVDF)	5
668	CeO2-modified P2-Na-Co-Mn-O cathode with enhanced sodium storage characteristics	2018	RSC Advances	10.1039/c8ra04210a	Cyclability	Coating	Na0.67Co0.5Mn0.5O2	P2			4	2	80	acetylene black	10	polyvinylidene fluoride (PVDF)	10
669	CeO2-modified P2-Na-Co-Mn-O cathode with enhanced sodium storage characteristics	2018	RSC Advances	10.1039/c8ra04210a	Cyclability	Coating	Na0.4Mn0.54Co0.46O2				4	2	80	acetylene black	10	polyvinylidene fluoride (PVDF)	10
670	CeO2-modified P2-Na-Co-Mn-O cathode with enhanced sodium storage characteristics	2018	RSC Advances	10.1039/c8ra04210a	Cyclability	Coating	Na0.67Ni0.4Co0.2Mn0.4O2				4	2	80	acetylene black	10	polyvinylidene fluoride (PVDF)	10
671	CeO2-modified P2-Na-Co-Mn-O cathode with enhanced sodium storage characteristics	2018	RSC Advances	10.1039/c8ra04210a	Cyclability	Coating	Na0.67Co0.25Mn0.65Cr0.10O2	P2	CeO2		4	2	80	acetylene black	10	polyvinylidene fluoride (PVDF)	10
672	CeO2-modified P2-Na-Co-Mn-O cathode with enhanced sodium storage characteristics	2018	RSC Advances	10.1039/c8ra04210a	Cyclability	Coating	Na2/3Ni1/3Mn2/3O2	P2	Al2O3		4.3	2.5	80	acetylene black	10	polyvinylidene fluoride (PVDF)	10
673	Environmentally stable interface of layered oxide cathodes for sodium-ion batteries	2017	Nature Communications	10.1038/s41467-017-00157-8	Cyclability	Coating	Na0.8Ni0.4Ti0.6O2	monoclinic	titaniumoxide		4	1.5	75	Teflonized acetylene black	20	polytetrafluoroethylene	5
674	Environmentally stable interface of layered oxide cathodes for sodium-ion batteries	2017	Nature Communications	10.1038/s41467-017-00157-8	Cyclability	Coating	Na(NiCoFeTi)1/4O2	monoclinic	titaniumoxide	biphasic	4	1.5	75	Teflonized acetylene black	20	polytetrafluoroethylene	5
675	Environmentally stable interface of layered oxide cathodes for sodium-ion batteries	2017	Nature Communications	10.1038/s41467-017-00157-8	Cyclability	Coating	NaMnO2	monoclinic		irregular	3.8		75	Teflonized acetylene black	20	polytetrafluoroethylene	5
676	Beyond divalent copper: A redox couple for sodium ion battery cathode materials	2015	ECS Electrochemistry Letters	10.1149/2.0041505eel	Cyclability	Composition	Na2/3Cu1/3Mn2/3O2	hexagonal		micron-sized	4.2	3
677	Beyond divalent copper: A redox couple for sodium ion battery cathode materials	2015	ECS Electrochemistry Letters	10.1149/2.0041505eel	Cyclability	Composition	NaFeO2	hexagonal			4.2	3
678	Beyond divalent copper: A redox couple for sodium ion battery cathode materials	2015	ECS Electrochemistry Letters	10.1149/2.0041505eel	Cyclability	Composition	NaMnO2	hexagonal			4.2	3
679	Beyond divalent copper: A redox couple for sodium ion battery cathode materials	2015	ECS Electrochemistry Letters	10.1149/2.0041505eel	Cyclability	Composition	NaNiO2	hexagonal			4.2	3
680	Beyond divalent copper: A redox couple for sodium ion battery cathode materials	2015	ECS Electrochemistry Letters	10.1149/2.0041505eel	Cyclability	Composition	NaCoO2	hexagonal			4.2	3
681	Surface transformation by a "cocktail" solvent enables stable cathode materials for sodium ion batteries	2018	Journal of Materials Chemistry A	10.1039/c7ta08410b	Cyclability	Coating	NaNi1/3Fe1/3Mn1/3O2	R3m	conformal	micron-sized	4	2	85	acetylene carbon black	10	polyvinylidene fluoride (PVDF)	5
682	Surface transformation by a "cocktail" solvent enables stable cathode materials for sodium ion batteries	2018	Journal of Materials Chemistry A	10.1039/c7ta08410b	Cyclability	Coating	NaNi0.5Mn0.5O2	R3m	conformal	footstep-like	4	2	85	acetylene carbon black	10	polyvinylidene fluoride (PVDF)	5
683	Surface transformation by a "cocktail" solvent enables stable cathode materials for sodium ion batteries	2018	Journal of Materials Chemistry A	10.1039/c7ta08410b	Cyclability	Coating	NaFeO2	a-NaFeO2			4.3	2	85	acetylene carbon black	10	polyvinylidene fluoride (PVDF)	5
684	Surface transformation by a "cocktail" solvent enables stable cathode materials for sodium ion batteries	2018	Journal of Materials Chemistry A	10.1039/c7ta08410b	Cyclability	Coating	NaCrO2	R3m			4	2	85	acetylene carbon black	10	polyvinylidene fluoride (PVDF)	5
685	Surface transformation by a "cocktail" solvent enables stable cathode materials for sodium ion batteries	2018	Journal of Materials Chemistry A	10.1039/c7ta08410b	Cyclability	Coating	NaV3O8				4	2	85	acetylene carbon black	10	polyvinylidene fluoride (PVDF)	5
686	Layered Na-Ion Cathodes with Outstanding Performance Resulting from the Synergetic Effect of Mixed P- and O-Type Phases	2016	Advanced Energy Materials	10.1002/aenm.201501555	Cyclability	Composition	Na0.45Ni0.22Co0.11Mn0.66O2				4.3	2	85	SuperC65	10	polyvinylidenedifluoride (PVdF)	5
687	Layered Na-Ion Cathodes with Outstanding Performance Resulting from the Synergetic Effect of Mixed P- and O-Type Phases	2016	Advanced Energy Materials	10.1002/aenm.201501555	Cyclability	Composition	Na0.5Ni0.23Fe0.13Mn0.63O2				4.3	2	85	SuperC65	10	polyvinylidenedifluoride (PVdF)	5
688	Layered Na-Ion Cathodes with Outstanding Performance Resulting from the Synergetic Effect of Mixed P- and O-Type Phases	2016	Advanced Energy Materials	10.1002/aenm.201501555	Cyclability	Composition	Na1Mn0.5Ni0.3Fe0.1Mg0.1O2	O3			4.3	2	85	SuperC65	10	polyvinylidenedifluoride (PVdF)	5
689	Layered Na-Ion Cathodes with Outstanding Performance Resulting from the Synergetic Effect of Mixed P- and O-Type Phases	2016	Advanced Energy Materials	10.1002/aenm.201501555	Cyclability	Composition	Na2/3Mn0.7Ni0.1Fe0.1Mg0.1O2	P2	sodiumcarbonate	flake	4.3	2	85	SuperC65	10	polyvinylidenedifluoride (PVdF)	5
690	Intermediate honeycomb ordering to trigger oxygen redox chemistry in layered battery electrode	2016	Nature Communications	10.1038/ncomms11397	Capacity	Composition	Na2RuO3	O3		honeycomb	4	1.5	80	acetylene black	10	polyvinylidene	10
691	Intermediate honeycomb ordering to trigger oxygen redox chemistry in layered battery electrode	2016	Nature Communications	10.1038/ncomms11397	Capacity	Composition	Na0.67Mn0.8Mg0.2O2				4.5	2	80	acetylene black	10	polyvinylidene	10
692	Intermediate honeycomb ordering to trigger oxygen redox chemistry in layered battery electrode	2016	Nature Communications	10.1038/ncomms11397	Capacity	Composition	NaMnO2				4	1.5	80	acetylene black	10	polyvinylidene	10
693	Intermediate honeycomb ordering to trigger oxygen redox chemistry in layered battery electrode	2016	Nature Communications	10.1038/ncomms11397	Capacity	Composition	NaFeO2-NaNi0.5Mn0.5O2				4	2	80	acetylene black	10	polyvinylidene	10
694	Intermediate honeycomb ordering to trigger oxygen redox chemistry in layered battery electrode	2016	Nature Communications	10.1038/ncomms11397	Capacity	Composition	NaFe0.5Mn0.5O2				4	1.5	80	acetylene black	10	polyvinylidene	10
695	Design of high-performance cathode materials with single-phase pathway for sodium ion batteries: A study on P2-Nax(LiyMn1-y)O2 compounds	2018	Journal of Power Sources	10.1016/j.jpowsour.2017.12.072	Capacity	Doping	Na0.6Li0.2Mn0.8O2	hexagonal		hexagonal	4.5	1.5	80	carbon black	10	PVdF	10
696	Design of high-performance cathode materials with single-phase pathway for sodium ion batteries: A study on P2-Nax(LiyMn1-y)O2 compounds	2018	Journal of Power Sources	10.1016/j.jpowsour.2017.12.072	Capacity	Doping	Na0.7Li0.23Mn0.77O2	hexagonal		hexagonal	4.5	1.5	80	carbon black	10	PVdF	10
697	Design of high-performance cathode materials with single-phase pathway for sodium ion batteries: A study on P2-Nax(LiyMn1-y)O2 compounds	2018	Journal of Power Sources	10.1016/j.jpowsour.2017.12.072	Capacity	Doping	Na0.75Li0.25Mn0.75O2				4.5	1.5	80	carbon black	10	PVdF	10
698	Design of high-performance cathode materials with single-phase pathway for sodium ion batteries: A study on P2-Nax(LiyMn1-y)O2 compounds	2018	Journal of Power Sources	10.1016/j.jpowsour.2017.12.072	Capacity	Doping	Na0.8Li0.27Mn0.73O2				4.5	1.5	80	carbon black	10	PVdF	10
699	Design of high-performance cathode materials with single-phase pathway for sodium ion batteries: A study on P2-Nax(LiyMn1-y)O2 compounds	2018	Journal of Power Sources	10.1016/j.jpowsour.2017.12.072	Capacity	Doping	NaMnO2	hexagonal		solid	4.5	1.5	80	carbon black	10	PVdF	10
700	Sodium insertion cathode material Na0.67[Ni0.4Co0.2Mn0.4]O2 with excellent electrochemical properties	2016	Electrochimica Acta	10.1016/j.electacta.2016.04.067	Capacity	Composition	Na0.67Ni0.4Co0.2Mn0.4O2	P2-O3		irregular	4.2	1.5	84	acetylene black	8	PVDF	8
701	Sodium insertion cathode material Na0.67[Ni0.4Co0.2Mn0.4]O2 with excellent electrochemical properties	2016	Electrochimica Acta	10.1016/j.electacta.2016.04.067	Capacity	Composition	Na0.67Mn0.65Ni0.15Co0.2O2	P2-O3		irregular	4.2	1.5	84	acetylene black	8	PVDF	8
702	Sodium insertion cathode material Na0.67[Ni0.4Co0.2Mn0.4]O2 with excellent electrochemical properties	2016	Electrochimica Acta	10.1016/j.electacta.2016.04.067	Capacity	Composition	Na0.67Mn0.65Fe0.2O2	P2-O3		irregular	4.2	1.5	84	acetylene black	8	PVDF	8
703	Sodium insertion cathode material Na0.67[Ni0.4Co0.2Mn0.4]O2 with excellent electrochemical properties	2016	Electrochimica Acta	10.1016/j.electacta.2016.04.067	Capacity	Composition	Na2/3Ni1/3Mn2/3O2	P2-O3		irregular	4.2	1.5	84	acetylene black	8	PVDF	8
704	Sodium insertion cathode material Na0.67[Ni0.4Co0.2Mn0.4]O2 with excellent electrochemical properties	2016	Electrochimica Acta	10.1016/j.electacta.2016.04.067	Capacity	Composition	Na2/3Co2/3Mn1/3O2	P2-O3		irregular	4.2	1.5	84	acetylene black	8	PVDF	8
705	Scaling relation between renormalized discharge rate and capacity in NaxCoO2 films	2015	APL Materials	10.1063/1.4933236	Capacity	Morphology	NaFe1/2Mn1/2O2				4	1.5	70
706	Scaling relation between renormalized discharge rate and capacity in NaxCoO2 films	2015	APL Materials	10.1063/1.4933236	Capacity	Morphology	NaFe1/2Co1/2O2				2		70
707	Scaling relation between renormalized discharge rate and capacity in NaxCoO2 films	2015	APL Materials	10.1063/1.4933236	Capacity	Morphology	Na0.7CoO2	P2		thinfilm	2.5		70
708	Scaling relation between renormalized discharge rate and capacity in NaxCoO2 films	2015	APL Materials	10.1063/1.4933236	Capacity	Morphology	NaCoO2	P2		thinfilm	2.5		70
709	Scaling relation between renormalized discharge rate and capacity in NaxCoO2 films	2015	APL Materials	10.1063/1.4933236	Capacity	Morphology	NaMnO2	P2			2		70
710	A sodium-ion battery exploiting layered oxide cathode, graphite anode and glyme-based electrolyte	2016	Journal of Power Sources	10.1016/j.jpowsour.2016.01.082	power	Composition	Na0.7CoO2	hexagonal		layered	3.7	0.5	80	carbon black	10	polyvinylidene fluoride (PVDF)	10
711	A sodium-ion battery exploiting layered oxide cathode, graphite anode and glyme-based electrolyte	2016	Journal of Power Sources	10.1016/j.jpowsour.2016.01.082	power	Composition	NaFeO2				3.8	2	80	carbon black	10	polyvinylidene fluoride (PVDF)	10
712	A sodium-ion battery exploiting layered oxide cathode, graphite anode and glyme-based electrolyte	2016	Journal of Power Sources	10.1016/j.jpowsour.2016.01.082	power	Composition	NaNiO2				3.8	2	80	carbon black	10	polyvinylidene fluoride (PVDF)	10
713	A sodium-ion battery exploiting layered oxide cathode, graphite anode and glyme-based electrolyte	2016	Journal of Power Sources	10.1016/j.jpowsour.2016.01.082	power	Composition	NaMnO2				3	0.5	80	carbon black	10	polyvinylidene fluoride (PVDF)	10
714	A sodium-ion battery exploiting layered oxide cathode, graphite anode and glyme-based electrolyte	2016	Journal of Power Sources	10.1016/j.jpowsour.2016.01.082	power	Composition	Na2/3Ni1/3Mn2/3O2				3	0.5	80	carbon black	10	polyvinylidene fluoride (PVDF)	10
715	Both Cationic and Anionic Co-(de)intercalation into a Metal-Oxide Material	2018	Joule	10.1016/j.joule.2018.03.010	Capacity	Composition	Na0.5Ni0.25Mn0.75O2	P3		particles	4.25	3.75	85	Super P carbon	10	polytetrafluoroethylene (PTFE)	5
716	Both Cationic and Anionic Co-(de)intercalation into a Metal-Oxide Material	2018	Joule	10.1016/j.joule.2018.03.010	Capacity	Composition	NaNi0.5Mn0.5O2	P3			4.25	3.75	85	Super P carbon	10	polytetrafluoroethylene (PTFE)	5
717	Both Cationic and Anionic Co-(de)intercalation into a Metal-Oxide Material	2018	Joule	10.1016/j.joule.2018.03.010	Capacity	Composition	NaNi0.5Co0.5O2				4.25	3.75	85	Super P carbon	10	polytetrafluoroethylene (PTFE)	5
718	Both Cationic and Anionic Co-(de)intercalation into a Metal-Oxide Material	2018	Joule	10.1016/j.joule.2018.03.010	Capacity	Composition	NaMnO2	P3			4.25	3.75	85	Super P carbon	10	polytetrafluoroethylene (PTFE)	5
719	Both Cationic and Anionic Co-(de)intercalation into a Metal-Oxide Material	2018	Joule	10.1016/j.joule.2018.03.010	Capacity	Composition	NaFeO2				4.25	3.75	85	Super P carbon	10	polytetrafluoroethylene (PTFE)	5
720	Titanium-doped P2-type Na0.67Co0.67Mn0.33-xTixO2 (0 ≤ x ≤ 0.2) as Novel Cathodes for sodium ion batteries with superior-rate	2018	International Journal of Electrochemical Science	10.20964/2018.02.62	Cyclability	Doping	NaCo1/2Fe1/2O2	P2			4	2.5	80	acetylene black	10	polyvinylidene fluoride (PVDF)	10
721	Titanium-doped P2-type Na0.67Co0.67Mn0.33-xTixO2 (0 ≤ x ≤ 0.2) as Novel Cathodes for sodium ion batteries with superior-rate	2018	International Journal of Electrochemical Science	10.20964/2018.02.62	Cyclability	Doping	Na0.66Co0.5Mn0.5O2	P2		hexagonal	4.2	2	80	acetylene black	10	polyvinylidene fluoride (PVDF)	10
722	Titanium-doped P2-type Na0.67Co0.67Mn0.33-xTixO2 (0 ≤ x ≤ 0.2) as Novel Cathodes for sodium ion batteries with superior-rate	2018	International Journal of Electrochemical Science	10.20964/2018.02.62	Cyclability	Doping	Na0.67Co0.67Mn0.23Ti0.1O2	P2		hexagonal	4.2	2	80	acetylene black	10	polyvinylidene fluoride (PVDF)	10
723	Titanium-doped P2-type Na0.67Co0.67Mn0.33-xTixO2 (0 ≤ x ≤ 0.2) as Novel Cathodes for sodium ion batteries with superior-rate	2018	International Journal of Electrochemical Science	10.20964/2018.02.62	Cyclability	Doping	NaχCo0.7Mn0.3O2	P2		hexagonal	4.1	2	80	acetylene black	10	polyvinylidene fluoride (PVDF)	10
724	Titanium-doped P2-type Na0.67Co0.67Mn0.33-xTixO2 (0 ≤ x ≤ 0.2) as Novel Cathodes for sodium ion batteries with superior-rate	2018	International Journal of Electrochemical Science	10.20964/2018.02.62	Cyclability	Doping	Na2/3Co2/3Mn1/3O2	P2		hexagonal	4.2	2	80	acetylene black	10	polyvinylidene fluoride (PVDF)	10
725	Exploring Oxygen Activity in the High Energy P2-Type Na0.78Ni0.23Mn0.69O2 Cathode Material for Na-Ion Batteries	2017	Journal of the American Chemical Society	10.1021/jacs.7b00164	Capacity	Composition	Na0.78Ni0.23Mn0.69O2	hexagonal			4.5	2	80	acetylene black	10	polyvinylidene fluoride (PVdF)	10
726	Exploring Oxygen Activity in the High Energy P2-Type Na0.78Ni0.23Mn0.69O2 Cathode Material for Na-Ion Batteries	2017	Journal of the American Chemical Society	10.1021/jacs.7b00164	Capacity	Composition	Na0.75Ni0.24Mn0.69O1.99	hexagonal			4.5	2	80	acetylene black	10	polyvinylidene fluoride (PVdF)	10
727	Exploring Oxygen Activity in the High Energy P2-Type Na0.78Ni0.23Mn0.69O2 Cathode Material for Na-Ion Batteries	2017	Journal of the American Chemical Society	10.1021/jacs.7b00164	Capacity	Composition	Na2CO3				4.5	2	80	acetylene black	10	polyvinylidene fluoride (PVdF)	10
728	Exploring Oxygen Activity in the High Energy P2-Type Na0.78Ni0.23Mn0.69O2 Cathode Material for Na-Ion Batteries	2017	Journal of the American Chemical Society	10.1021/jacs.7b00164	Capacity	Composition	Ni(NO3)2	hexagonal			4.5	2	80	acetylene black	10	polyvinylidene fluoride (PVdF)	10
729	Exploring Oxygen Activity in the High Energy P2-Type Na0.78Ni0.23Mn0.69O2 Cathode Material for Na-Ion Batteries	2017	Journal of the American Chemical Society	10.1021/jacs.7b00164	Capacity	Composition	Mn(NO3)2	hexagonal			4.5	2	80	acetylene black	10	polyvinylidene fluoride (PVdF)	10
730	Self-Templated Formation of P2-type K0.6CoO2 Microspheres for High Reversible Potassium-Ion Batteries	2018	Nano Letters	10.1021/acs.nanolett.7b05324	Cyclability	Morphology	K0.6CoO2	hexagonal		microspheres	4	1.7
731	Self-Templated Formation of P2-type K0.6CoO2 Microspheres for High Reversible Potassium-Ion Batteries	2018	Nano Letters	10.1021/acs.nanolett.7b05324	Cyclability	Morphology	K0.3MnO2				4	1.7
732	Self-Templated Formation of P2-type K0.6CoO2 Microspheres for High Reversible Potassium-Ion Batteries	2018	Nano Letters	10.1021/acs.nanolett.7b05324	Cyclability	Morphology	K0.7Fe0.5Mn0.5O2				3.8	0.5
733	Self-Templated Formation of P2-type K0.6CoO2 Microspheres for High Reversible Potassium-Ion Batteries	2018	Nano Letters	10.1021/acs.nanolett.7b05324	Cyclability	Morphology	K0.5MnO2				4	1.7
734	Self-Templated Formation of P2-type K0.6CoO2 Microspheres for High Reversible Potassium-Ion Batteries	2018	Nano Letters	10.1021/acs.nanolett.7b05324	Cyclability	Morphology	K0.6CoO2	hexagonal		microspheres	4	1.7
735	Communication - O3-type layered oxide with a quaternary transition metal composition for na-ion battery cathodes: NaTi0.25Fe0.25Co0.25Ni0.25O2	2017	Journal of the Electrochemical Society	10.1149/2.0271714jes	Capacity	Composition	NaTi0.25Fe0.25Co0.25Ni0.25O2	O3		micronsized	4.2	2	100
736	Communication - O3-type layered oxide with a quaternary transition metal composition for na-ion battery cathodes: NaTi0.25Fe0.25Co0.25Ni0.25O2	2017	Journal of the Electrochemical Society	10.1149/2.0271714jes	Capacity	Composition	NaFe1/3Co1/3Ni1/3O2	O3		hexagonal	4.2	2	100
737	Communication - O3-type layered oxide with a quaternary transition metal composition for na-ion battery cathodes: NaTi0.25Fe0.25Co0.25Ni0.25O2	2017	Journal of the Electrochemical Society	10.1149/2.0271714jes	Capacity	Composition	NaFeO2	O3			4	2	100
738	Communication - O3-type layered oxide with a quaternary transition metal composition for na-ion battery cathodes: NaTi0.25Fe0.25Co0.25Ni0.25O2	2017	Journal of the Electrochemical Society	10.1149/2.0271714jes	Capacity	Composition	NaMO2	hexagonal		micronsized	4.2	2	100
739	Communication - O3-type layered oxide with a quaternary transition metal composition for na-ion battery cathodes: NaTi0.25Fe0.25Co0.25Ni0.25O2	2017	Journal of the Electrochemical Society	10.1149/2.0271714jes	Capacity	Composition	NaFe1/3Co1/3Ni1/3O2	O3		hexagonal	4.2	2	100
740	Solid state synthesis of layered sodium manganese oxide for sodium-ion battery by in-situ high energy X-ray diffraction and X-ray absorption near edge spectroscopy	2017	Journal of Power Sources	10.1016/j.jpowsour.2016.11.022	Mechanism	Composition	Na2/3MnO2	P2		platelet	3.8	1.9
741	Solid state synthesis of layered sodium manganese oxide for sodium-ion battery by in-situ high energy X-ray diffraction and X-ray absorption near edge spectroscopy	2017	Journal of Power Sources	10.1016/j.jpowsour.2016.11.022	Mechanism	Composition	NaMnO2	orthorhombic		platelet	3.8	1.9
742	Solid state synthesis of layered sodium manganese oxide for sodium-ion battery by in-situ high energy X-ray diffraction and X-ray absorption near edge spectroscopy	2017	Journal of Power Sources	10.1016/j.jpowsour.2016.11.022	Mechanism	Composition	Na2/3Ni0.5Mn0.5O2	P2		platelet	3.8	1.9
743	Solid state synthesis of layered sodium manganese oxide for sodium-ion battery by in-situ high energy X-ray diffraction and X-ray absorption near edge spectroscopy	2017	Journal of Power Sources	10.1016/j.jpowsour.2016.11.022	Mechanism	Composition	Na2/3Co0.5Mn0.5O2	P2			3.8	1.9
744	Solid state synthesis of layered sodium manganese oxide for sodium-ion battery by in-situ high energy X-ray diffraction and X-ray absorption near edge spectroscopy	2017	Journal of Power Sources	10.1016/j.jpowsour.2016.11.022	Mechanism	Composition	Na2/3Ni0.33Co0.33Mn0.33O2	P3			3.8	1.9
745	Suppressing the voltage decay of low-cost P2-type iron-based cathode materials for sodium-ion batteries	2018	Journal of Materials Chemistry A	10.1039/C8TA07933A	Cyclability	Doping	NaFeO2	P2		hexagonal	4.2	2.5	70	acetylene black	20	polyvinylidene fluoride (PVdF)	10
746	Suppressing the voltage decay of low-cost P2-type iron-based cathode materials for sodium-ion batteries	2018	Journal of Materials Chemistry A	10.1039/C8TA07933A	Cyclability	Doping	Na0.7Cu0.2Fe0.2Mn0.6O2	P2			4.2	2.5	70	acetylene black	20	polyvinylidene fluoride (PVdF)	10
747	Suppressing the voltage decay of low-cost P2-type iron-based cathode materials for sodium-ion batteries	2018	Journal of Materials Chemistry A	10.1039/C8TA07933A	Cyclability	Doping	Na0.7Cu0.15Fe0.3Mn0.55O2	P2			4.2	2.5	70	acetylene black	20	polyvinylidene fluoride (PVdF)	10
748	Suppressing the voltage decay of low-cost P2-type iron-based cathode materials for sodium-ion batteries	2018	Journal of Materials Chemistry A	10.1039/C8TA07933A	Cyclability	Doping	Na0.7Cu0.15Fe0.3Mn0.55O2	P2			4.2	2.5	70	acetylene black	20	polyvinylidene fluoride (PVdF)	10
749	Na+/vacancy disordering promises high-rate Na-ion batteries	2018	Science Advances	10.1126/sciadv.aar6018	Cyclability	Composition	NaNi0.5Mn0.5O2	P2		plate-like	4.15	2.5	75	Super P carbon	15	polyvinylidene difluoride	10
750	Na+/vacancy disordering promises high-rate Na-ion batteries	2018	Science Advances	10.1126/sciadv.aar6018	Cyclability	Composition	Na(NiCoFeTi)1/4O2	P2		plate-like	4.15	2.5	75	Super P carbon	15	polyvinylidene difluoride	10
751	Na+/vacancy disordering promises high-rate Na-ion batteries	2018	Science Advances	10.1126/sciadv.aar6018	Cyclability	Composition	Na0.67Mn0.65Ni0.2Co0.15O2	P2			4.15	2.5	75	Super P carbon	15	polyvinylidene difluoride	10
752	Na+/vacancy disordering promises high-rate Na-ion batteries	2018	Science Advances	10.1126/sciadv.aar6018	Cyclability	Composition	Na2/3Ni1/3Mn5/9Al1/9O2	P2			4.15	2.5	75	Super P carbon	15	polyvinylidene difluoride	10
753	Layered-to-Rock-Salt Transformation in Desodiated NaxCrO2 (x 0.4)	2016	Chemistry of Materials	10.1021/acs.chemmater.5b04626	Cyclability	Composition	NaNi1/3Mn1/3Co1/3O2	layered			4	2
754	Layered-to-Rock-Salt Transformation in Desodiated NaxCrO2 (x 0.4)	2016	Chemistry of Materials	10.1021/acs.chemmater.5b04626	Cyclability	Composition	NaCrO2	P3			4	2.6
755	Layered-to-Rock-Salt Transformation in Desodiated NaxCrO2 (x 0.4)	2016	Chemistry of Materials	10.1021/acs.chemmater.5b04626	Cyclability	Composition	NaFe0.5Co0.5O2				4	2
756	Layered-to-Rock-Salt Transformation in Desodiated NaxCrO2 (x 0.4)	2016	Chemistry of Materials	10.1021/acs.chemmater.5b04626	Cyclability	Composition	NaNi0.5Mn0.5O2				4	2
757	Layered-to-Rock-Salt Transformation in Desodiated NaxCrO2 (x 0.4)	2016	Chemistry of Materials	10.1021/acs.chemmater.5b04626	Cyclability	Composition	Na0.67Mn0.5Fe0.5O2				4	1.5
758	Cation-mixing stabilized layered oxide cathodes for sodium-ion batteries	2018	Science Bulletin	10.1016/j.scib.2018.02.012	Cyclability	Composition	NaNi0.6Co0.4O2	O3			4	2	75	teflonized acetylene black	20	polytetrafluoroethylene	5
759	Cation-mixing stabilized layered oxide cathodes for sodium-ion batteries	2018	Science Bulletin	10.1016/j.scib.2018.02.012	Cyclability	Composition	NaNi1/3Mn1/3Co1/3O2	O3			4	2	75	teflonized acetylene black	20	polytetrafluoroethylene	5
760	Cation-mixing stabilized layered oxide cathodes for sodium-ion batteries	2018	Science Bulletin	10.1016/j.scib.2018.02.012	Cyclability	Composition	NaFe1/2Mn1/2O2	P2			4	2	75	teflonized acetylene black	20	polytetrafluoroethylene	5
761	Cation-mixing stabilized layered oxide cathodes for sodium-ion batteries	2018	Science Bulletin	10.1016/j.scib.2018.02.012	Cyclability	Composition	Na0.67Mn0.8Mg0.2O2				4.3	2	75	teflonized acetylene black	20	polytetrafluoroethylene	5
762	Cation-mixing stabilized layered oxide cathodes for sodium-ion batteries	2018	Science Bulletin	10.1016/j.scib.2018.02.012	Cyclability	Composition	NaNi0.25Fe0.5Mn0.25O2				4	2	75	teflonized acetylene black	20	polytetrafluoroethylene	5
763	Lithium-substituted sodium layered transition metal oxide fibers as cathodes for sodium-ion batteries	2015	Energy Storage Materials	10.1016/j.ensm.2015.09.005	Capacity	Doping	NaNi1/3Fe1/3Mn1/3O2	P2			4.2	1.5	70	BTY 175	20	polyvinylidene fluoride (PVDF, Solef 5130)	10
764	Lithium-substituted sodium layered transition metal oxide fibers as cathodes for sodium-ion batteries	2015	Energy Storage Materials	10.1016/j.ensm.2015.09.005	Capacity	Doping	NaCrO2	O3			4.2	1.5	70	BTY 175	20	polyvinylidene fluoride (PVDF, Solef 5130)	10
765	Lithium-substituted sodium layered transition metal oxide fibers as cathodes for sodium-ion batteries	2015	Energy Storage Materials	10.1016/j.ensm.2015.09.005	Capacity	Doping	NaVO2	O3			4.2	1.5	70	BTY 175	20	polyvinylidene fluoride (PVDF, Solef 5130)	10
766	Lithium-substituted sodium layered transition metal oxide fibers as cathodes for sodium-ion batteries	2015	Energy Storage Materials	10.1016/j.ensm.2015.09.005	Capacity	Doping	NaNi0.5Mn0.5O2	O3			4.2	1.5	70	BTY 175	20	polyvinylidene fluoride (PVDF, Solef 5130)	10
767	Structure-Induced Reversible Anionic Redox Activity in Na Layered Oxide Cathode	2018	Joule	10.1016/j.joule.2017.10.008	Capacity	Crystal	LiCoO2	layered			4.5	3.5	80	Super P	15	polytetrafluoroethylene	5
768	Structure-Induced Reversible Anionic Redox Activity in Na Layered Oxide Cathode	2018	Joule	10.1016/j.joule.2017.10.008	Capacity	Crystal	LiNi0.5Co0.5O2				4.3	2.5	80	Super P	15	polytetrafluoroethylene	5
769	Structure-Induced Reversible Anionic Redox Activity in Na Layered Oxide Cathode	2018	Joule	10.1016/j.joule.2017.10.008	Capacity	Crystal	LiNi0.5Mn0.5O2				4.5	3.5	80	Super P	15	polytetrafluoroethylene	5
770	Structure-Induced Reversible Anionic Redox Activity in Na Layered Oxide Cathode	2018	Joule	10.1016/j.joule.2017.10.008	Capacity	Crystal	LiNi0.2Li0.2Mn0.6O2				4.8	2	80	Super P	15	polytetrafluoroethylene	5
771	Structure-Induced Reversible Anionic Redox Activity in Na Layered Oxide Cathode	2018	Joule	10.1016/j.joule.2017.10.008	Capacity	Crystal	Na0.6Li0.2Mn0.8O2	P3			4.5	3.5	80	Super P	15	polytetrafluoroethylene	5
772	Insight into Ca-Substitution Effects on O3-Type NaNi1/3Fe1/3Mn1/3O2 Cathode Materials for Sodium-Ion Batteries Application	2018	Small	10.1002/smll.201704523	Cyclability	Doping	NaNi1/3Fe1/3Mn1/3O2	R-3m		spherical	4	2	80	super P	10	polyvinylidene difluoride	10
773	Insight into Ca-Substitution Effects on O3-Type NaNi1/3Fe1/3Mn1/3O2 Cathode Materials for Sodium-Ion Batteries Application	2018	Small	10.1002/smll.201704523	Cyclability	Doping	Na0.9Ca0.05Ni1/3Fe1/3Mn1/3O2	R-3m		spherical	4	2	80	super P	10	polyvinylidene difluoride	10
774	Insight into Ca-Substitution Effects on O3-Type NaNi1/3Fe1/3Mn1/3O2 Cathode Materials for Sodium-Ion Batteries Application	2018	Small	10.1002/smll.201704523	Cyclability	Doping	NaFeO2	R-3m		spherical	4	2	80	super P	10	polyvinylidene difluoride	10
775	A Practical High-Energy Cathode for Sodium-Ion Batteries Based on Uniform P2-Na0.7CoO2 Microspheres	2017	Angewandte Chemie - International Edition	10.1002/anie.201702024	Cyclability	Morphology	Na0.7CoO2	P2		microspheres	3.8	2	70
776	A Practical High-Energy Cathode for Sodium-Ion Batteries Based on Uniform P2-Na0.7CoO2 Microspheres	2017	Angewandte Chemie - International Edition	10.1002/anie.201702024	Cyclability	Morphology	Na0.7MnO2			microspheres	3.8	2	70
777	A Practical High-Energy Cathode for Sodium-Ion Batteries Based on Uniform P2-Na0.7CoO2 Microspheres	2017	Angewandte Chemie - International Edition	10.1002/anie.201702024	Cyclability	Morphology	NaFeO2	O3		microspheres	3.8	2	70
778	A Practical High-Energy Cathode for Sodium-Ion Batteries Based on Uniform P2-Na0.7CoO2 Microspheres	2017	Angewandte Chemie - International Edition	10.1002/anie.201702024	Cyclability	Morphology	NaNi0.5Mn0.5O2				3.8	2	70
779	A Practical High-Energy Cathode for Sodium-Ion Batteries Based on Uniform P2-Na0.7CoO2 Microspheres	2017	Angewandte Chemie - International Edition	10.1002/anie.201702024	Cyclability	Morphology	Na2/3Ni1/3Mn2/3O2				3.8	2	70
780	Reversible anionic redox activity in Na3RuO4 cathodes: A prototype Na-rich layered oxide	2018	Energy and Environmental Science	10.1039/c7ee03554c	Capacity	Composition	Na3RuO4	monoclinic		layered	4
781	Reversible anionic redox activity in Na3RuO4 cathodes: A prototype Na-rich layered oxide	2018	Energy and Environmental Science	10.1039/c7ee03554c	Capacity	Composition	Na2RuO3				4
782	Reversible anionic redox activity in Na3RuO4 cathodes: A prototype Na-rich layered oxide	2018	Energy and Environmental Science	10.1039/c7ee03554c	Capacity	Composition	NaNa1/2Ru1/2O2	monoclinic			4
783	Reversible anionic redox activity in Na3RuO4 cathodes: A prototype Na-rich layered oxide	2018	Energy and Environmental Science	10.1039/c7ee03554c	Capacity	Composition	Na2MnO3				4
784	Reversible anionic redox activity in Na3RuO4 cathodes: A prototype Na-rich layered oxide	2018	Energy and Environmental Science	10.1039/c7ee03554c	Capacity	Composition	Li2MnO3				4
785	The interaction between Cu and Fe in P2-type NaxTmO2 cathodes for advanced battery performance	2018	Journal of the Electrochemical Society	10.1149/2.0171807jes	Cyclability	Composition	Na0.6MnO2				4.5	1.5	80	carbon black	15	PTFE	5
786	The interaction between Cu and Fe in P2-type NaxTmO2 cathodes for advanced battery performance	2018	Journal of the Electrochemical Society	10.1149/2.0171807jes	Cyclability	Composition	Na2/3Fe1/2Mn1/2O2				4.5	1.5	80	carbon black	15	PTFE	5
787	The interaction between Cu and Fe in P2-type NaxTmO2 cathodes for advanced battery performance	2018	Journal of the Electrochemical Society	10.1149/2.0171807jes	Cyclability	Composition	Na0.68Cu0.34Mn0.66O2				4.3	2	80	carbon black	15	PTFE	5
788	The interaction between Cu and Fe in P2-type NaxTmO2 cathodes for advanced battery performance	2018	Journal of the Electrochemical Society	10.1149/2.0171807jes	Cyclability	Composition	Na2/3MnO2	P2			4	1.5	80	carbon black	15	PTFE	5
789	The interaction between Cu and Fe in P2-type NaxTmO2 cathodes for advanced battery performance	2018	Journal of the Electrochemical Society	10.1149/2.0171807jes	Cyclability	Composition	Na2/3(Mn1/2Fe1/4Co1/4)O2				4.5	1.5	80	carbon black	15	PTFE	5
790	Large-scale synthesis of NaNi1/3Fe1/3Mn1/3O2 as high performance cathode materials for sodium ion batteries	2016	Journal of the Electrochemical Society	10.1149/2.0011605jes			NaNi1/3Fe1/3Mn1/3O2	layered					80	super P	10	polyvinylidene fluoride (PVDF)	10
791	Large-scale synthesis of NaNi1/3Fe1/3Mn1/3O2 as high performance cathode materials for sodium ion batteries	2016	Journal of the Electrochemical Society	10.1149/2.0011605jes			Na2/3Ni1/3Mn2/3O2	hexagonal		sheet-like	4.4	2	80	super P	10	polyvinylidene fluoride (PVDF)	10
792	Large-scale synthesis of NaNi1/3Fe1/3Mn1/3O2 as high performance cathode materials for sodium ion batteries	2016	Journal of the Electrochemical Society	10.1149/2.0011605jes			NaNi0.5Mn0.5O2				4	2	80	super P	10	polyvinylidene fluoride (PVDF)	10
793	Large-scale synthesis of NaNi1/3Fe1/3Mn1/3O2 as high performance cathode materials for sodium ion batteries	2016	Journal of the Electrochemical Society	10.1149/2.0011605jes			Na0.67Mn0.65Co0.2Ni0.15O2	hexagonal		sheet-like	4.4	2	80	super P	10	polyvinylidene fluoride (PVDF)	10
794	Large-scale synthesis of NaNi1/3Fe1/3Mn1/3O2 as high performance cathode materials for sodium ion batteries	2016	Journal of the Electrochemical Society	10.1149/2.0011605jes			NaNi0.25Fe0.5Mn0.25O2				4.4	2	80	super P	10	polyvinylidene fluoride (PVDF)	10
795	A comparative study of layered transition metal oxide cathodes for application in sodium-ion battery	2015	ACS Applied Materials and Interfaces	10.1021/am5080437	Capacity	Composition	Na0.67Mn0.65Fe0.2Ni0.15O2	hexagonal			4.6	1.5	85	carbon black (Super C65)	10	polivinylidene fluoride (PVDF)	5
796	Application of Na2CO3 as a Sacrificial Electrode Additive in Na-ion Batteries to Compensate for the Sodium Deficiency in Na2/3[Fe1/2Mn1/2]O2	2024	Batteries and Supercaps	10.1002/batt.202400009	Mechanism	Composition	Na2/3Fe1/2Mn1/2O2	P2			4.3	1	80	acetyleneblack	10	polyvinylidene fluoride	10
797	Application of Na2CO3 as a Sacrificial Electrode Additive in Na-ion Batteries to Compensate for the Sodium Deficiency in Na2/3[Fe1/2Mn1/2]O2	2024	Batteries and Supercaps	10.1002/batt.202400009	Mechanism	Composition	NaNi1/2Mn1/2O2	O3			4.3	1	80	acetyleneblack	10	polyvinylidene fluoride	10
798	Application of Na2CO3 as a Sacrificial Electrode Additive in Na-ion Batteries to Compensate for the Sodium Deficiency in Na2/3[Fe1/2Mn1/2]O2	2024	Batteries and Supercaps	10.1002/batt.202400009	Mechanism	Composition	NaCrO2				4.3		80	acetyleneblack	10	polyvinylidene fluoride	10
799	Application of Na2CO3 as a Sacrificial Electrode Additive in Na-ion Batteries to Compensate for the Sodium Deficiency in Na2/3[Fe1/2Mn1/2]O2	2024	Batteries and Supercaps	10.1002/batt.202400009	Mechanism	Composition	NaFe1/2Co1/2O2	O3			4.3	1	80	acetyleneblack	10	polyvinylidene fluoride	10
800	Application of Na2CO3 as a Sacrificial Electrode Additive in Na-ion Batteries to Compensate for the Sodium Deficiency in Na2/3[Fe1/2Mn1/2]O2	2024	Batteries and Supercaps	10.1002/batt.202400009	Mechanism	Composition	Na2/3Fe1/2Mn1/2O2	P2			4.3	1	80	acetyleneblack	10	polyvinylidene fluoride	10
801	High-entropy layer assisting quasi-zero-strain cathodes for P2-Na2/3Ni1/3Mn2/3O2	2024	Applied Physics Letters	10.1063/5.0206490	Cyclability	Coating	Na2/3Ni1/3Mn2/3O2	P2	HE		4	2
802	High-entropy layer assisting quasi-zero-strain cathodes for P2-Na2/3Ni1/3Mn2/3O2	2024	Applied Physics Letters	10.1063/5.0206490	Cyclability	Coating	NaNi0.12Cu0.12Mg0.12Fe0.15Co0.15Mn0.1Ti0.1Sn0.1Sb0.04O2	P2	HE		3.9	2
803	High-entropy layer assisting quasi-zero-strain cathodes for P2-Na2/3Ni1/3Mn2/3O2	2024	Applied Physics Letters	10.1063/5.0206490	Cyclability	Coating	Na(Mn0.2Ni0.2Co0.2Al0.2Fe0.2)O2	P2	HE		4	2
804	High-entropy layer assisting quasi-zero-strain cathodes for P2-Na2/3Ni1/3Mn2/3O2	2024	Applied Physics Letters	10.1063/5.0206490	Cyclability	Coating	Na2/3Ni1/3Mn2/3O2 with Al, Ti, Mg and Zn substitution	P2	HE		4	2
805	High-entropy layer assisting quasi-zero-strain cathodes for P2-Na2/3Ni1/3Mn2/3O2	2024	Applied Physics Letters	10.1063/5.0206490	Cyclability	Coating	Na2/3Ni1/3Mn2/3O2 with high-entropy material surface modification	P2	HE		3.8	2
806	Manipulating O3/P2 phase ratio in bi-phasic sodium layered oxides via ionic radius control	2023	Communications Materials	10.1038/s43246-023-00337-8	Cyclability	Composition	Na0.67Mn0.55Ni0.25Ti0.2O2				4.2	2.3	80	super C65 carbon	10	Solef 5130 (modified polyvinylidene fluoride (PVDF))	10
807	Manipulating O3/P2 phase ratio in bi-phasic sodium layered oxides via ionic radius control	2023	Communications Materials	10.1038/s43246-023-00337-8	Cyclability	Composition	Na0.67Fe0.425Mn0.425Mg0.15O2				4.2	2	80	super C65 carbon	10	Solef 5130 (modified polyvinylidene fluoride (PVDF))	10
808	Manipulating O3/P2 phase ratio in bi-phasic sodium layered oxides via ionic radius control	2023	Communications Materials	10.1038/s43246-023-00337-8	Cyclability	Composition	Na7/9Cu2/9Fe1/9Mn2/3O2				4.2	1.5	80	super C65 carbon	10	Solef 5130 (modified polyvinylidene fluoride (PVDF))	10
809	Manipulating O3/P2 phase ratio in bi-phasic sodium layered oxides via ionic radius control	2023	Communications Materials	10.1038/s43246-023-00337-8	Cyclability	Composition	Na0.67Mn0.67Ni0.33O2				4	2	80	super C65 carbon	10	Solef 5130 (modified polyvinylidene fluoride (PVDF))	10
810	Manipulating O3/P2 phase ratio in bi-phasic sodium layered oxides via ionic radius control	2023	Communications Materials	10.1038/s43246-023-00337-8	Cyclability	Composition	Na0.9Fe0.5Mn0.5O2				4	1.5	80	super C65 carbon	10	Solef 5130 (modified polyvinylidene fluoride (PVDF))	10
811	High-Performance Layered Oxides for Sodium-Ion Batteries Achieved through Combined Aluminum Substitution and Surface Treatment	2023	Batteries	10.3390/batteries9020144	Cyclability	Doping	Na2/3Ni1/3Mn2/3O2	P2			4.8	1.5	80	carbon black, Super C65	10	polyvinylidene fluoride (PVDF)	10
812	High-Performance Layered Oxides for Sodium-Ion Batteries Achieved through Combined Aluminum Substitution and Surface Treatment	2023	Batteries	10.3390/batteries9020144	Cyclability	Doping	Na2/3Ni1/2Mn1/2O2	P3	Al2O3		4.8	1.5	80	carbon black, Super C65	10	polyvinylidene fluoride (PVDF)	10
813	Effect of Cu Substitution in P′2- and P2-Type Sodium Manganese-Based Oxides	2022	ACS Applied Energy Materials	10.1021/acsaem.2c02581	Cyclability	Doping	NaVO2				4.5	1.5	80	acetyleneblack	10	poly(vinylidenefluoride) (PVDF)	10
814	Effect of Cu Substitution in P′2- and P2-Type Sodium Manganese-Based Oxides	2022	ACS Applied Energy Materials	10.1021/acsaem.2c02581	Cyclability	Doping	Na0.67Mg0.28Mn0.72O2				4.2	1.5	80	acetyleneblack	10	poly(vinylidenefluoride) (PVDF)	10
815	Effect of Cu Substitution in P′2- and P2-Type Sodium Manganese-Based Oxides	2022	ACS Applied Energy Materials	10.1021/acsaem.2c02581	Cyclability	Doping	NaCrO2				4.2	1.5	80	acetyleneblack	10	poly(vinylidenefluoride) (PVDF)	10
816	Effect of Cu Substitution in P′2- and P2-Type Sodium Manganese-Based Oxides	2022	ACS Applied Energy Materials	10.1021/acsaem.2c02581	Cyclability	Doping	Na2/3Fe1/2Mn1/2O2				4.2	1.5	80	acetyleneblack	10	poly(vinylidenefluoride) (PVDF)	10
817	Operando Interaction and Transformation of Metastable Defects in Layered Oxides for Na-Ion Batteries	2023	Advanced Energy Materials	10.1002/aenm.202203654	Mechanism	Crystal	Na0.78Ni0.23Mn0.69O2	P2		plate-like	4.5		80	acetylene black	10	polyvinylidene fluoride (PVDF)	10
818	Operando Interaction and Transformation of Metastable Defects in Layered Oxides for Na-Ion Batteries	2023	Advanced Energy Materials	10.1002/aenm.202203654	Mechanism	Crystal	Na0.66Ni0.33Mn0.66O2	P2		plate-like	4.5		80	acetylene black	10	polyvinylidene fluoride (PVDF)	10
819	Effects of Particle Size and Polytype on the Redox Reversibility of the Layered Na0.76Ni0.38Mn0.62O2 Electrode	2024	ACS Applied Energy Materials	10.1021/acsaem.3c02462	Cyclability	Morphology	Na0.76Ni0.38Mn0.62O2	polytype		hexagonalplatelet	4.4	1.6	80	acetyleneblack	10	poly(vinylidene fluoride) (PVDF)	10
820	Effects of Particle Size and Polytype on the Redox Reversibility of the Layered Na0.76Ni0.38Mn0.62O2 Electrode	2024	ACS Applied Energy Materials	10.1021/acsaem.3c02462	Cyclability	Morphology	Na2/3Ni1/3Mn2/3O2				4.4	1.6	80	acetyleneblack	10	poly(vinylidene fluoride) (PVDF)	10
821	Effects of Particle Size and Polytype on the Redox Reversibility of the Layered Na0.76Ni0.38Mn0.62O2 Electrode	2024	ACS Applied Energy Materials	10.1021/acsaem.3c02462	Cyclability	Morphology	P3-Na0.9Ni0.5Mn0.5O2	P3			4.4	1.6	80	acetyleneblack	10	poly(vinylidene fluoride) (PVDF)	10
822	Effects of Particle Size and Polytype on the Redox Reversibility of the Layered Na0.76Ni0.38Mn0.62O2 Electrode	2024	ACS Applied Energy Materials	10.1021/acsaem.3c02462	Cyclability	Morphology	NaNi0.5Mn0.5O2				3.8	1.6	80	acetyleneblack	10	poly(vinylidene fluoride) (PVDF)	10
823	Effects of Particle Size and Polytype on the Redox Reversibility of the Layered Na0.76Ni0.38Mn0.62O2 Electrode	2024	ACS Applied Energy Materials	10.1021/acsaem.3c02462	Cyclability	Morphology	Na2/3Ni1/3Mn2/3O2				4.4	1.6	80	acetyleneblack	10	poly(vinylidene fluoride) (PVDF)	10
824	Impact of Salts and Linear Carbonates on the Performance of Layered Oxide/Hard Carbon Sodium-Ion Pouch Cells with Alkyl Carbonate Electrolytes	2024	Journal of the Electrochemical Society	10.1149/1945-7111/ad3b73	Cyclability	Composition	NaNi0.5Mn0.5O2				3.8	2
825	Impact of Salts and Linear Carbonates on the Performance of Layered Oxide/Hard Carbon Sodium-Ion Pouch Cells with Alkyl Carbonate Electrolytes	2024	Journal of the Electrochemical Society	10.1149/1945-7111/ad3b73	Cyclability	Composition	NaNi0.5Co0.5O2				3.8	2
826	Impact of Salts and Linear Carbonates on the Performance of Layered Oxide/Hard Carbon Sodium-Ion Pouch Cells with Alkyl Carbonate Electrolytes	2024	Journal of the Electrochemical Society	10.1149/1945-7111/ad3b73	Cyclability	Composition	NaMnO2				3.8	2
827	Impact of Salts and Linear Carbonates on the Performance of Layered Oxide/Hard Carbon Sodium-Ion Pouch Cells with Alkyl Carbonate Electrolytes	2024	Journal of the Electrochemical Society	10.1149/1945-7111/ad3b73	Cyclability	Composition	NaFeO2				3.8	2
828	Impact of Salts and Linear Carbonates on the Performance of Layered Oxide/Hard Carbon Sodium-Ion Pouch Cells with Alkyl Carbonate Electrolytes	2024	Journal of the Electrochemical Society	10.1149/1945-7111/ad3b73	Cyclability	Composition	NaCoO2				3.8	2
829	Na-Rich Layered Transition Metal Oxides with Core/Shell Structures for Improved Performance of Sodium-Ion Batteries	2022	Journal of Physical Chemistry C	10.1021/acs.jpcc.2c05700	Cyclability	Morphology	Na7/9Cu2/9Fe1/9Mn2/3O2				4.2	1.5	70	carbon black	20	polyvinylidene fluoride (PVDF)	10
830	Na-Rich Layered Transition Metal Oxides with Core/Shell Structures for Improved Performance of Sodium-Ion Batteries	2022	Journal of Physical Chemistry C	10.1021/acs.jpcc.2c05700	Cyclability	Morphology	Na0.44MnO2				4.2	1.5	70	carbon black	20	polyvinylidene fluoride (PVDF)	10
831	Na-Rich Layered Transition Metal Oxides with Core/Shell Structures for Improved Performance of Sodium-Ion Batteries	2022	Journal of Physical Chemistry C	10.1021/acs.jpcc.2c05700	Cyclability	Morphology	Na0.67Mn0.66Co0.17Ni0.17O2	hexagonal		microsphere	4.2	2	70	carbon black	20	polyvinylidene fluoride (PVDF)	10
832	Na-Rich Layered Transition Metal Oxides with Core/Shell Structures for Improved Performance of Sodium-Ion Batteries	2022	Journal of Physical Chemistry C	10.1021/acs.jpcc.2c05700	Cyclability	Morphology	Na0.67MnO2				4.2	2	70	carbon black	20	polyvinylidene fluoride (PVDF)	10
833	Can Layered Oxide/Hard Carbon Sodium-Ion Pouch Cells with Simple Electrolyte Additives Achieve Better Cycle Life than LFP/Graphite Cells?	2024	Journal of the Electrochemical Society	10.1149/1945-7111/ad47da	Cyclability	Composition	NaMn0.39Fe0.31Ni0.22Zn0.08O2	O3layered			3.8	2	70	carbon black	20	CMC and SBR	10
834	Can Layered Oxide/Hard Carbon Sodium-Ion Pouch Cells with Simple Electrolyte Additives Achieve Better Cycle Life than LFP/Graphite Cells?	2024	Journal of the Electrochemical Society	10.1149/1945-7111/ad47da	Cyclability	Composition	LiNi0.5Mn0.3Co0.2O2				4.2	2.5	70	carbon black	20	CMC and SBR	10
835	Effect of Ti-Substitution on the Properties of P3 Structure Na2/3Mn0.8Li0.2O2 Showing a Ribbon Superlattice	2022	ChemElectroChem	10.1002/celc.202200929	Cyclability	Doping	Na0.67Li0.2Ti0.15Mn0.65O2	triclinic		agglomeratedparticles	4.4	1.6	75	super C65 carbon	25
836	Effect of Ti-Substitution on the Properties of P3 Structure Na2/3Mn0.8Li0.2O2 Showing a Ribbon Superlattice	2022	ChemElectroChem	10.1002/celc.202200929	Cyclability	Doping	Na0.67Li0.2Mn0.8O2	triclinic			4.4	1.8	75	super C65 carbon	25
837	Effect of Ti-Substitution on the Properties of P3 Structure Na2/3Mn0.8Li0.2O2 Showing a Ribbon Superlattice	2022	ChemElectroChem	10.1002/celc.202200929	Cyclability	Doping	Na4/7&1/7Mn6/7O2				4.6	1.5	75	super C65 carbon	25
838	Effect of Ti-Substitution on the Properties of P3 Structure Na2/3Mn0.8Li0.2O2 Showing a Ribbon Superlattice	2022	ChemElectroChem	10.1002/celc.202200929	Cyclability	Doping	Na4/7&1/7Ti1/7Mn5/7O2				4.4	1.6	75	super C65 carbon	25
839	High Energy Density Li/Ni/Co-Free O3/P2 Sodium Layered Oxide Intergrowth for Sodium-Ion Batteries	2023	Batteries and Supercaps	10.1002/batt.202300089	Capacity	Composition	Na0.75Mn0.35Fe0.35Ti0.1Al0.1Cu0.1O2	O3/P2		smooth	4.2	2.2	80	superC65carbon	10	Solef5130	10
840	High Energy Density Li/Ni/Co-Free O3/P2 Sodium Layered Oxide Intergrowth for Sodium-Ion Batteries	2023	Batteries and Supercaps	10.1002/batt.202300089	Capacity	Composition	NaMn0.5Fe0.5O2				4.2	2.2	80	superC65carbon	10	Solef5130	10
841	High Energy Density Li/Ni/Co-Free O3/P2 Sodium Layered Oxide Intergrowth for Sodium-Ion Batteries	2023	Batteries and Supercaps	10.1002/batt.202300089	Capacity	Composition	Na0.67Mn0.5Fe0.5O2				4.2	2.2	80	superC65carbon	10	Solef5130	10
842	Impact of Mg and Ti doping in O3 type NaNi1/2Mn1/2O2on reversibility and phase transition during electrochemical Na intercalation	2021	Journal of Materials Chemistry A	10.1039/d1ta01164b	Cyclability	Doping	NaNi1/2Mn1/2O2	O3			3.8	2	80	acetylene black	10	poly(vinylidene fluoride) (PVdF)	10
843	Impact of Mg and Ti doping in O3 type NaNi1/2Mn1/2O2on reversibility and phase transition during electrochemical Na intercalation	2021	Journal of Materials Chemistry A	10.1039/d1ta01164b	Cyclability	Doping	NaNi4/9Mn1/3Mg1/18Ti1/6O2	O3		powders	4		80	acetylene black	10	poly(vinylidene fluoride) (PVdF)	10
844	Impact of Mg and Ti doping in O3 type NaNi1/2Mn1/2O2on reversibility and phase transition during electrochemical Na intercalation	2021	Journal of Materials Chemistry A	10.1039/d1ta01164b	Cyclability	Doping	Na2/3Ni1/3Mn2/3O2	O3			4.5	2.2	80	acetylene black	10	poly(vinylidene fluoride) (PVdF)	10
845	Impact of Mg and Ti doping in O3 type NaNi1/2Mn1/2O2on reversibility and phase transition during electrochemical Na intercalation	2021	Journal of Materials Chemistry A	10.1039/d1ta01164b	Cyclability	Doping	NaNi1/2Mn1/2O2	O3			3.8	2	80	acetylene black	10	poly(vinylidene fluoride) (PVdF)	10
846	Activation of anion redox in P3 structure cobalt-doped sodium manganese oxide via introduction of transition metal vacancies	2021	Journal of Power Sources	10.1016/j.jpowsour.2020.229010	Cyclability	Doping	Na2/3Co0.1Mn0.9O2	P3		agglomerated	4.4	1.8	75	super C65 carbon	15	Solef 5130 (modified PVDF)	10
847	Activation of anion redox in P3 structure cobalt-doped sodium manganese oxide via introduction of transition metal vacancies	2021	Journal of Power Sources	10.1016/j.jpowsour.2020.229010	Cyclability	Doping	Na2/3Co2/3Mn1/3O2	P3		agglomerated	4.4	1.8	75	super C65 carbon	15	Solef 5130 (modified PVDF)	10
848	Unlocking anionic redox activity in O3-type sodium 3d layered oxides via Li substitution	2021	Nature Materials	10.1038/s41563-020-00870-8	Capacity	Composition	Na2IrO3	O3			4	1.5	76	carbon Super P	20	PTFE	4
849	Unlocking anionic redox activity in O3-type sodium 3d layered oxides via Li substitution	2021	Nature Materials	10.1038/s41563-020-00870-8	Capacity	Composition	Na(Li1/3Mn2/3)O2	O3			4.5	1.5	76	carbon Super P	20	PTFE	4
850	Unlocking anionic redox activity in O3-type sodium 3d layered oxides via Li substitution	2021	Nature Materials	10.1038/s41563-020-00870-8	Capacity	Composition	Na(Li1/3Ir2/3)O2	O3			4.2	1.5	76	carbon Super P	20	PTFE	4
851	Enhanced Cycling Stability in the Anion Redox Material P3-Type Zn-Substituted Sodium Manganese Oxide	2022	ChemElectroChem	10.1002/celc.202200240	Cyclability	Doping	Na4/7&1/7Mn6/7O2				4.3	1.8	75	superC65carbon	15	Solef5130 (modified polyvinylidene fluoride, PVDF)	10
852	Enhanced Cycling Stability in the Anion Redox Material P3-Type Zn-Substituted Sodium Manganese Oxide	2022	ChemElectroChem	10.1002/celc.202200240	Cyclability	Doping	NaNi0.45M0.05Mn0.4Ti0.1O2	O3			4.3	1.8	75	superC65carbon	15	Solef5130 (modified polyvinylidene fluoride, PVDF)	10
853	Enhanced Cycling Stability in the Anion Redox Material P3-Type Zn-Substituted Sodium Manganese Oxide	2022	ChemElectroChem	10.1002/celc.202200240	Cyclability	Doping	Air-Na0.67Mn0.75Zn0.25O2	P3			4.3	1.8	75	superC65carbon	15	Solef5130 (modified polyvinylidene fluoride, PVDF)	10
854	Enhanced Cycling Stability in the Anion Redox Material P3-Type Zn-Substituted Sodium Manganese Oxide	2022	ChemElectroChem	10.1002/celc.202200240	Cyclability	Doping	Oxy-Na0.67Mn0.75Zn0.25O2	P3		agglomerated	4.3	1.8	75	superC65carbon	15	Solef5130 (modified polyvinylidene fluoride, PVDF)	10
855	Enhanced Cycling Stability in the Anion Redox Material P3-Type Zn-Substituted Sodium Manganese Oxide	2022	ChemElectroChem	10.1002/celc.202200240	Cyclability	Doping	Air-Na0.67Mn0.9Zn0.1O2	P3			4.3	1.8	75	superC65carbon	15	Solef5130 (modified polyvinylidene fluoride, PVDF)	10
856	Structural change induced by electrochemical sodium extraction from layered O′3-NaMnO2	2021	Journal of Materials Chemistry A	10.1039/d1ta05390f	Cyclability	Crystal	NaMnO2	orthorhombic		agglomerate	3.476	2	80	acetylene black	10	poly(vinylidene fluoride) (PVdF)	10
857	Structural change induced by electrochemical sodium extraction from layered O′3-NaMnO2	2021	Journal of Materials Chemistry A	10.1039/d1ta05390f	Cyclability	Crystal	NaCoO2				3.55	2	80	acetylene black	10	poly(vinylidene fluoride) (PVdF)	10
858	Structural change induced by electrochemical sodium extraction from layered O′3-NaMnO2	2021	Journal of Materials Chemistry A	10.1039/d1ta05390f	Cyclability	Crystal	NaFeO2				3.55	2	80	acetylene black	10	poly(vinylidene fluoride) (PVdF)	10
859	Structural change induced by electrochemical sodium extraction from layered O′3-NaMnO2	2021	Journal of Materials Chemistry A	10.1039/d1ta05390f	Cyclability	Crystal	NaNiO2	O03			3.55	2	80	acetylene black	10	poly(vinylidene fluoride) (PVdF)	10
860	Structural change induced by electrochemical sodium extraction from layered O′3-NaMnO2	2021	Journal of Materials Chemistry A	10.1039/d1ta05390f	Cyclability	Crystal	NaCrO2				3.55	2	80	acetylene black	10	poly(vinylidene fluoride) (PVdF)	10
861	Vacancy-enhanced oxygen redox reversibility in P3-type magnesium-doped sodium manganese oxide Na0.67Mg0.2Mn0.8O2	2020	ACS Applied Energy Materials	10.1021/acsaem.0c01352	Cyclability	Composition	Na2Mn3O7				4.3	1.8	75	super C65 carbon	15	Solef 5130 (modified polyvinylidene fluoride (PVDF))	10
862	Vacancy-enhanced oxygen redox reversibility in P3-type magnesium-doped sodium manganese oxide Na0.67Mg0.2Mn0.8O2	2020	ACS Applied Energy Materials	10.1021/acsaem.0c01352	Cyclability	Composition	Na0.78Ni0.23Mn0.69O2				4.3	1.8	75	super C65 carbon	15	Solef 5130 (modified polyvinylidene fluoride (PVDF))	10
863	Vacancy-enhanced oxygen redox reversibility in P3-type magnesium-doped sodium manganese oxide Na0.67Mg0.2Mn0.8O2	2020	ACS Applied Energy Materials	10.1021/acsaem.0c01352	Cyclability	Composition	Na2/3Mg0.28Mn0.72O2	P3		agglomerated	3.8	1.8	75	super C65 carbon	15	Solef 5130 (modified polyvinylidene fluoride (PVDF))	10
864	Vacancy-enhanced oxygen redox reversibility in P3-type magnesium-doped sodium manganese oxide Na0.67Mg0.2Mn0.8O2	2020	ACS Applied Energy Materials	10.1021/acsaem.0c01352	Cyclability	Composition	Na2/3Mg1/3Mn2/3O2	P3		agglomerated	3.8	1.8	75	super C65 carbon	15	Solef 5130 (modified polyvinylidene fluoride (PVDF))	10
865	Electrochemistry and solid-state chemistry of layered oxides for Li-, Na-, and K-ion batteries	2020	Electrochemistry	10.5796/ELECTROCHEMISTRY.20-00092	Mechanism	Crystal	NaNi1/2Mn1/2O2	O3			4.5	2
866	The Role of Metal Substitution in Tuning Anion Redox in Sodium Metal Layered Oxides Revealed by X-Ray Spectroscopy and Theory	2021	Angewandte Chemie - International Edition	10.1002/anie.202012205	Mechanism	Doping	Na0.67Fe0.5Mn0.5O2	P2			4.2	1.5	70	carbon black	20	PVDF	10
867	The Role of Metal Substitution in Tuning Anion Redox in Sodium Metal Layered Oxides Revealed by X-Ray Spectroscopy and Theory	2021	Angewandte Chemie - International Edition	10.1002/anie.202012205	Mechanism	Doping	Na0.67Mn0.66Fe0.20Cu0.14O2	P2			4.2	1.5	70	carbon black	20	PVDF	10
868	The Role of Metal Substitution in Tuning Anion Redox in Sodium Metal Layered Oxides Revealed by X-Ray Spectroscopy and Theory	2021	Angewandte Chemie - International Edition	10.1002/anie.202012205	Mechanism	Doping	Na0.67Mn0.65Fe0.20Ni0.15O2	P2			4.2	1.5	70	carbon black	20	PVDF	10
869	The Role of Metal Substitution in Tuning Anion Redox in Sodium Metal Layered Oxides Revealed by X-Ray Spectroscopy and Theory	2021	Angewandte Chemie - International Edition	10.1002/anie.202012205	Mechanism	Doping	Na0.6Li0.2Mn0.8O2				4.5	2	70	carbon black	20	PVDF	10
870	The Role of Metal Substitution in Tuning Anion Redox in Sodium Metal Layered Oxides Revealed by X-Ray Spectroscopy and Theory	2021	Angewandte Chemie - International Edition	10.1002/anie.202012205	Mechanism	Doping	Na2RuO3				4	1.5	70	carbon black	20	PVDF	10
871	Enhanced oxygen redox reversibility and capacity retention of titanium-substituted Na4/7[□1/7Ti1/7Mn5/7]O2 in sodium-ion batteries	2022	Journal of Materials Chemistry A	10.1039/d2ta01485h	Cyclability	Doping	Na4/7□1/7Mn6/7O2	P/C221		homogeneous	4.4	1.6	70	conductive carbon C65	20
872	Enhanced oxygen redox reversibility and capacity retention of titanium-substituted Na4/7[□1/7Ti1/7Mn5/7]O2 in sodium-ion batteries	2022	Journal of Materials Chemistry A	10.1039/d2ta01485h	Cyclability	Doping	Na4/7□1/7Ti1/7Mn5/7O2	triclinic		homogeneous	4.4	1.6	70	conductive carbon C65	20
873	Enhanced oxygen redox reversibility and capacity retention of titanium-substituted Na4/7[□1/7Ti1/7Mn5/7]O2 in sodium-ion batteries	2022	Journal of Materials Chemistry A	10.1039/d2ta01485h	Cyclability	Doping	Na2/3Ni1/3Mn2/3O2			homogeneous	4.4	1.6	70	conductive carbon C65	20
874	Enhanced oxygen redox reversibility and capacity retention of titanium-substituted Na4/7[□1/7Ti1/7Mn5/7]O2 in sodium-ion batteries	2022	Journal of Materials Chemistry A	10.1039/d2ta01485h	Cyclability	Doping	Na2/3Ni1/3Mn1/3Ti1/3O2	triclinic		homogeneous	4.4	1.6	70	conductive carbon C65	20
875	Enhanced oxygen redox reversibility and capacity retention of titanium-substituted Na4/7[□1/7Ti1/7Mn5/7]O2 in sodium-ion batteries	2022	Journal of Materials Chemistry A	10.1039/d2ta01485h	Cyclability	Doping	Na6/7□1/7Mn6/7O2			homogeneous	4.4	1.6	70	conductive carbon C65	20
876	Sodium de-insertion processes in single NaxTMO2 particles studied by an electrochemical collision method: O3 phases versus P2 phases	2021	Electrochemistry Communications	10.1016/j.elecom.2021.107000	Mechanism	Crystal	Na0.5Cu0.1Ni0.2Fe0.2Mn0.5O2	P2			2.2	1.6	80	Super C65	10	polyvinylidene fluoride (PVdF)	10
877	Sodium de-insertion processes in single NaxTMO2 particles studied by an electrochemical collision method: O3 phases versus P2 phases	2021	Electrochemistry Communications	10.1016/j.elecom.2021.107000	Mechanism	Crystal	Na0.8Cu0.1Ni0.2Fe0.2Mn0.5O2	O3			2.2	1.6	80	Super C65	10	polyvinylidene fluoride (PVdF)	10
878	Local spring effect in titanium-based layered oxides	2020	Energy and Environmental Science	10.1039/d0ee02313b	Mechanism	Composition	Na(NiCoFeTi)(1/4)O2	P2	carbon	hexagonal	3	0	80	Super-P	10	PVDF	10
879	Local spring effect in titanium-based layered oxides	2020	Energy and Environmental Science	10.1039/d0ee02313b	Mechanism	Composition	Na0.67Co0.33Ti0.67O2	P2			3	0	80	Super-P	10	PVDF	10
880	Local spring effect in titanium-based layered oxides	2020	Energy and Environmental Science	10.1039/d0ee02313b	Mechanism	Composition	Na0.6Cr0.6Ti0.4O2	P2			3	0	80	Super-P	10	PVDF	10
881	Local spring effect in titanium-based layered oxides	2020	Energy and Environmental Science	10.1039/d0ee02313b	Mechanism	Composition	NaNi0.5Ti0.5O2	P2			3	0	80	Super-P	10	PVDF	10
882	Local spring effect in titanium-based layered oxides	2020	Energy and Environmental Science	10.1039/d0ee02313b	Mechanism	Composition	Na0.8Ni0.4Ti0.6O2	P2			3	0	80	Super-P	10	PVDF	10
883	A Chemical Approach to Raise Cell Voltage and Suppress Phase Transition in O3 Sodium Layered Oxide Electrodes	2018	Advanced Energy Materials	10.1002/aenm.201702599	Cyclability	Doping	NaNi0.5Sn0.5O2	R-3m			4.2	2
884	A Chemical Approach to Raise Cell Voltage and Suppress Phase Transition in O3 Sodium Layered Oxide Electrodes	2018	Advanced Energy Materials	10.1002/aenm.201702599	Cyclability	Doping	NaNi0.5Mn0.5O2	hexagonal			3.8	2
885	A Chemical Approach to Raise Cell Voltage and Suppress Phase Transition in O3 Sodium Layered Oxide Electrodes	2018	Advanced Energy Materials	10.1002/aenm.201702599	Cyclability	Doping	NaNi0.5Mn0.1Sn0.4O2	hexagonal			3.8	2
886	A Chemical Approach to Raise Cell Voltage and Suppress Phase Transition in O3 Sodium Layered Oxide Electrodes	2018	Advanced Energy Materials	10.1002/aenm.201702599	Cyclability	Doping	NaNi0.5Mn0.2Sn0.3O2	hexagonal			4.2	2
887	A Chemical Approach to Raise Cell Voltage and Suppress Phase Transition in O3 Sodium Layered Oxide Electrodes	2018	Advanced Energy Materials	10.1002/aenm.201702599	Cyclability	Doping	NaNi0.5Mn0.3Sn0.2O2	R-3m			3.8	2
888	Cobalt-substituted Na0.44Mn1-xCoxO2: phase evolution and a high capacity positive electrode for sodium-ion batteries	2016	Electrochimica Acta	10.1016/j.electacta.2016.07.089	Capacity	Doping	Na0.66Co0.5Mn0.5O2				4	2	90			PVDF	10
889	Cobalt-substituted Na0.44Mn1-xCoxO2: phase evolution and a high capacity positive electrode for sodium-ion batteries	2016	Electrochimica Acta	10.1016/j.electacta.2016.07.089	Capacity	Doping	Na0.67Mn0.65Ni0.2Co0.15O2	P2		nano-plates	4.2	2	90			PVDF	10
890	Sodium Electrochemical Deintercalation and Intercalation in O3-NaRhO 2 and P2-Na x RhO 2 Layered Oxides	2019	Inorganic Chemistry	10.1021/acs.inorgchem.8b03130	Mechanism	Composition	Na1/2RhO2	monoclinic			3.8	2.5	70	graphite/carbon-black	30
891	Sodium Electrochemical Deintercalation and Intercalation in O3-NaRhO 2 and P2-Na x RhO 2 Layered Oxides	2019	Inorganic Chemistry	10.1021/acs.inorgchem.8b03130	Mechanism	Composition	Na1/3RhO2				3.8	2.5	70	graphite/carbon-black	30
892	Sodium Electrochemical Deintercalation and Intercalation in O3-NaRhO 2 and P2-Na x RhO 2 Layered Oxides	2019	Inorganic Chemistry	10.1021/acs.inorgchem.8b03130	Mechanism	Composition	Na0.70RhO2	P2			3.8	2.5	70	graphite/carbon-black	30
893	Sodium Electrochemical Deintercalation and Intercalation in O3-NaRhO 2 and P2-Na x RhO 2 Layered Oxides	2019	Inorganic Chemistry	10.1021/acs.inorgchem.8b03130	Mechanism	Composition	Na1/2VO2	O3			3.42	2.5	70	graphite/carbon-black	30
894	Sodium Electrochemical Deintercalation and Intercalation in O3-NaRhO 2 and P2-Na x RhO 2 Layered Oxides	2019	Inorganic Chemistry	10.1021/acs.inorgchem.8b03130	Mechanism	Composition	NaRhO2	O3			3.8	2.5	70	graphite/carbon-black	30
895	NaMoO2: A Layered Oxide with Molybdenum Clusters	2020	Inorganic Chemistry	10.1021/acs.inorgchem.9b03688	Mechanism	Composition	NaMoO2	triclinic		blackpowder	3.5	1.7	88	carbon black	10	PTFE (polytetrafluoroethylene)	2
896	NaMoO2: A Layered Oxide with Molybdenum Clusters	2020	Inorganic Chemistry	10.1021/acs.inorgchem.9b03688	Mechanism	Composition	Na2/3MoO2	triclinic			3.5	1.7	88	carbon black	10	PTFE (polytetrafluoroethylene)	2
897	NaMoO2: A Layered Oxide with Molybdenum Clusters	2020	Inorganic Chemistry	10.1021/acs.inorgchem.9b03688	Mechanism	Composition	Na1/2MoO2	triclinic		blackpowder	3.5	1.7	88	carbon black	10	PTFE (polytetrafluoroethylene)	2
898	NaMoO2: A Layered Oxide with Molybdenum Clusters	2020	Inorganic Chemistry	10.1021/acs.inorgchem.9b03688	Mechanism	Composition	Na0.82MoO2	triclinic		blackpowder	3.5	1.7	88	carbon black	10	PTFE (polytetrafluoroethylene)	2
899	NaMoO2: A Layered Oxide with Molybdenum Clusters	2020	Inorganic Chemistry	10.1021/acs.inorgchem.9b03688	Mechanism	Composition	Na0.3MoO2	triclinic		powder	3.5	1.7	88	carbon black	10	PTFE (polytetrafluoroethylene)	2
900	Pseudocapacitive charge storage properties of Na2/3Co2/3Mn2/9Ni1/9O2 in Na-ion batteries	2018	Electrochimica Acta	10.1016/j.electacta.2018.04.150	Mechanism	Composition	NaNi1/3Mn1/3Co1/3O2	P2			4.2	2	75	carbon black	15	polyvinylidene fluoride (PVdF)	10
901	Pseudocapacitive charge storage properties of Na2/3Co2/3Mn2/9Ni1/9O2 in Na-ion batteries	2018	Electrochimica Acta	10.1016/j.electacta.2018.04.150	Mechanism	Composition	Na0.67Mn0.65Co0.2Ni0.15O2	P2	sodiumcarbonate	hexagonal	4.2	2	75	carbon black	15	polyvinylidene fluoride (PVdF)	10
902	Pseudocapacitive charge storage properties of Na2/3Co2/3Mn2/9Ni1/9O2 in Na-ion batteries	2018	Electrochimica Acta	10.1016/j.electacta.2018.04.150	Mechanism	Composition	Na0.45Ni0.22Co0.11Mn0.66O2	P2		hexagonal	4.2	2	75	carbon black	15	polyvinylidene fluoride (PVdF)	10
903	Pseudocapacitive charge storage properties of Na2/3Co2/3Mn2/9Ni1/9O2 in Na-ion batteries	2018	Electrochimica Acta	10.1016/j.electacta.2018.04.150	Mechanism	Composition	Na2/3Co1/2Ti1/2O2				4.2	2	75	carbon black	15	polyvinylidene fluoride (PVdF)	10
904	Pseudocapacitive charge storage properties of Na2/3Co2/3Mn2/9Ni1/9O2 in Na-ion batteries	2018	Electrochimica Acta	10.1016/j.electacta.2018.04.150	Mechanism	Composition	Na0.66Co0.5Mn0.5O2	P2	sodiumcarbonate	hexagonal	4.2	2	75	carbon black	15	polyvinylidene fluoride (PVdF)	10
905	Strong oxygen participation in the redox governing the structural and electrochemical properties of Na-rich layered oxide Na2IrO3	2016	Chemistry of Materials	10.1021/acs.chemmater.6b03338	Capacity	Composition	LiLi0.2Ni0.13Mn0.54Co0.13O2	layered			4.3		75	carbon	15	Kynar Flex	10
906	Strong oxygen participation in the redox governing the structural and electrochemical properties of Na-rich layered oxide Na2IrO3	2016	Chemistry of Materials	10.1021/acs.chemmater.6b03338	Capacity	Composition	Li1.2Nb0.5Mn0.5O2				4.3		75	carbon	15	Kynar Flex	10
907	Strong oxygen participation in the redox governing the structural and electrochemical properties of Na-rich layered oxide Na2IrO3	2016	Chemistry of Materials	10.1021/acs.chemmater.6b03338	Capacity	Composition	Li4Mn2O5				4.3		75	carbon	15	Kynar Flex	10
908	Strong oxygen participation in the redox governing the structural and electrochemical properties of Na-rich layered oxide Na2IrO3	2016	Chemistry of Materials	10.1021/acs.chemmater.6b03338	Capacity	Composition	Na2IrO3	monoclinic			4	1.5	75	carbon	15	Kynar Flex	10
909	Oxygen Redox Activity through a Reductive Coupling Mechanism in the P3-Type Nickel-Doped Sodium Manganese Oxide	2020	ACS Applied Energy Materials	10.1021/acsaem.9b02171	Mechanism	Doping	Na0.67Ni0.2Mn0.8O2	P3		particles	3.8	1.8	75	super C65 carbon	15	Solef 5130	10
910	Oxygen Redox Activity through a Reductive Coupling Mechanism in the P3-Type Nickel-Doped Sodium Manganese Oxide	2020	ACS Applied Energy Materials	10.1021/acsaem.9b02171	Mechanism	Doping	Na0.78Ni0.23Mn0.69O2				4.4	1.8	75	super C65 carbon	15	Solef 5130	10
911	Oxygen Redox Activity through a Reductive Coupling Mechanism in the P3-Type Nickel-Doped Sodium Manganese Oxide	2020	ACS Applied Energy Materials	10.1021/acsaem.9b02171	Mechanism	Doping	Na2/3Mg0.28Mn0.72O2	P2			4.4	1.8	75	super C65 carbon	15	Solef 5130	10
912	Oxygen Redox Activity through a Reductive Coupling Mechanism in the P3-Type Nickel-Doped Sodium Manganese Oxide	2020	ACS Applied Energy Materials	10.1021/acsaem.9b02171	Mechanism	Doping	Na2/3Mg1/3Mn2/3O2	P2			4.4	1.8	75	super C65 carbon	15	Solef 5130	10
913	The Role of Divalent (Zn2+/Mg2+/Cu2+) Substituents in Achieving Full Capacity of Sodium Layered Oxides for Na-Ion Battery Applications	2020	Chemistry of Materials	10.1021/acs.chemmater.9b05205	Capacity	Doping	NaNi0.45Zn0.05Mn0.4Ti0.1O2	O3			4.2	2	85	super P carbon	15
914	The Role of Divalent (Zn2+/Mg2+/Cu2+) Substituents in Achieving Full Capacity of Sodium Layered Oxides for Na-Ion Battery Applications	2020	Chemistry of Materials	10.1021/acs.chemmater.9b05205	Capacity	Doping	NaNi0.5Mn0.4Ti0.1O2	O3			4		85	super P carbon	15
915	The Role of Divalent (Zn2+/Mg2+/Cu2+) Substituents in Achieving Full Capacity of Sodium Layered Oxides for Na-Ion Battery Applications	2020	Chemistry of Materials	10.1021/acs.chemmater.9b05205	Capacity	Doping	Na0.2Ni0.45Zn0.05Mn0.4Ti0.1O2	O3			4.2		85	super P carbon	15
916	Quantification of Anionic Redox Chemistry in a Prototype Na-Rich Layered Oxide	2020	ACS Applied Materials and Interfaces	10.1021/acsami.9b19204	Cyclability	Composition	Na3RuO4	layered		nanometer-sized	4	1.5	70	Carbon black	20	PVDF	10
917	Quantification of Anionic Redox Chemistry in a Prototype Na-Rich Layered Oxide	2020	ACS Applied Materials and Interfaces	10.1021/acsami.9b19204	Cyclability	Composition	Na2IrO3				4	1.5	70	Carbon black	20	PVDF	10
918	Quantification of Anionic Redox Chemistry in a Prototype Na-Rich Layered Oxide	2020	ACS Applied Materials and Interfaces	10.1021/acsami.9b19204	Cyclability	Composition	NaFeO2	layered			4	1.5	70	Carbon black	20	PVDF	10
919	Quantification of Anionic Redox Chemistry in a Prototype Na-Rich Layered Oxide	2020	ACS Applied Materials and Interfaces	10.1021/acsami.9b19204	Cyclability	Composition	Li1.20Mn0.54Co0.13Ni0.13O2				4.8	2	70	Carbon black	20	PVDF	10
920	Quantification of Anionic Redox Chemistry in a Prototype Na-Rich Layered Oxide	2020	ACS Applied Materials and Interfaces	10.1021/acsami.9b19204	Cyclability	Composition	Na2ZrO3				4	1.5	70	Carbon black	20	PVDF	10
921	Reaching the Energy Density Limit of Layered O3-NaNi0.5Mn0.5O2 Electrodes via Dual Cu and Ti Substitution	2019	Advanced Energy Materials	10.1002/aenm.201901785	Capacity	Doping	NaNi0.5Mn0.5O2	O3			4.5	2
922	Reaching the Energy Density Limit of Layered O3-NaNi0.5Mn0.5O2 Electrodes via Dual Cu and Ti Substitution	2019	Advanced Energy Materials	10.1002/aenm.201901785	Capacity	Doping	NaNi0.4Cu0.1Mn0.4Ti0.1O2	O3		flake-like	4.5	2
923	Reaching the Energy Density Limit of Layered O3-NaNi0.5Mn0.5O2 Electrodes via Dual Cu and Ti Substitution	2019	Advanced Energy Materials	10.1002/aenm.201901785	Capacity	Doping	NaNi0.5Mn0.4Ti0.1O2	O3		flake-like	4.5	2
924	Reaching the Energy Density Limit of Layered O3-NaNi0.5Mn0.5O2 Electrodes via Dual Cu and Ti Substitution	2019	Advanced Energy Materials	10.1002/aenm.201901785	Capacity	Doping	NaNi0.5Mn0.3Ti0.2O2	O3			4.5	2
925	Reaching the Energy Density Limit of Layered O3-NaNi0.5Mn0.5O2 Electrodes via Dual Cu and Ti Substitution	2019	Advanced Energy Materials	10.1002/aenm.201901785	Capacity	Doping	NaNi0.5Mn0.2Ti0.3O2				4.5	2
926	Comparison of lithium and sodium intercalation materials	2015	Journal of the Serbian Chemical Society	10.2298/JSC141119127V	None	None	Na1.2V3O8			belts			70	carbon	20	PVDF	10
927	Understanding the Multiple Effects of TiO2 Coating on NaMn0.33Fe0.33Ni0.33O2 Cathode Material for Na-Ion Batteries	2020	ACS Applied Energy Materials	10.1021/acsaem.9b02021	Cyclability	Coating	Na2/3Ni1/3Mn2/3O2	P2	TiO2		4.2	1.5	75	Super-P	15	polyvinylidene fluoride (PVDF)	10
928	Understanding the Multiple Effects of TiO2 Coating on NaMn0.33Fe0.33Ni0.33O2 Cathode Material for Na-Ion Batteries	2020	ACS Applied Energy Materials	10.1021/acsaem.9b02021	Cyclability	Coating	NaNi0.5Mn0.5O2		TiO2	plate-like	4.2	1.5	75	Super-P	15	polyvinylidene fluoride (PVDF)	10
929	Understanding the Multiple Effects of TiO2 Coating on NaMn0.33Fe0.33Ni0.33O2 Cathode Material for Na-Ion Batteries	2020	ACS Applied Energy Materials	10.1021/acsaem.9b02021	Cyclability	Coating	Na2/3(Fe1/2Mn1/2)O2	P2	TiO2	nanofibers	4.2	1.5	75	Super-P	15	polyvinylidene fluoride (PVDF)	10
930	Understanding the Multiple Effects of TiO2 Coating on NaMn0.33Fe0.33Ni0.33O2 Cathode Material for Na-Ion Batteries	2020	ACS Applied Energy Materials	10.1021/acsaem.9b02021	Cyclability	Coating	NaFe0.5Co0.5O2				4.2	1.5	75	Super-P	15	polyvinylidene fluoride (PVDF)	10
931	Understanding the Multiple Effects of TiO2 Coating on NaMn0.33Fe0.33Ni0.33O2 Cathode Material for Na-Ion Batteries	2020	ACS Applied Energy Materials	10.1021/acsaem.9b02021	Cyclability	Coating	Na0.67Mn0.5Fe0.5O2	P2	TiO2		4.2	1.5	75	Super-P	15	polyvinylidene fluoride (PVDF)	10
932	P2-Na0.6 [Cr0.6 Ti0.4 ]O2 cation-disordered electrode for high-rate symmetric rechargeable sodium-ion batteries	2015	Nature Communications	10.1038/ncomms7954	power	Composition	Na0.67Mn0.65Co0.2Ni0.15O2	P2		microflakes	4	2	75	acetylene black	20	polyvinylidene fluoride (PVDF)	5
933	P2-Na0.6 [Cr0.6 Ti0.4 ]O2 cation-disordered electrode for high-rate symmetric rechargeable sodium-ion batteries	2015	Nature Communications	10.1038/ncomms7954	power	Composition	Na0.70Mn0.60Ni0.30Co0.10O2	P2			4.2	2	75	acetylene black	20	polyvinylidene fluoride (PVDF)	5
934	P2-Na0.6 [Cr0.6 Ti0.4 ]O2 cation-disordered electrode for high-rate symmetric rechargeable sodium-ion batteries	2015	Nature Communications	10.1038/ncomms7954	power	Composition	Na2/3Mg0.28Mn0.72O2	P2			4.5	1.5	75	acetylene black	20	polyvinylidene fluoride (PVDF)	5
935	P2-Na0.6 [Cr0.6 Ti0.4 ]O2 cation-disordered electrode for high-rate symmetric rechargeable sodium-ion batteries	2015	Nature Communications	10.1038/ncomms7954	power	Composition	Na2/3Fe1/3Mn2/3O2	P2			4	2	75	acetylene black	20	polyvinylidene fluoride (PVDF)	5
936	Dual Stabilization and Sacrificial Effect of Na2CO3 for Increasing Capacities of Na-Ion Cells Based on P2-NaxMO2 Electrodes	2017	Chemistry of Materials	10.1021/acs.chemmater.7b01542	Capacity	Composition	Na2/3Mn0.8Fe0.1Ti0.1O2				4.1	1.5	85	conducting carbon	15
937	Dual Stabilization and Sacrificial Effect of Na2CO3 for Increasing Capacities of Na-Ion Cells Based on P2-NaxMO2 Electrodes	2017	Chemistry of Materials	10.1021/acs.chemmater.7b01542	Capacity	Composition	Na2/3Mn1/2Fe1/2O2	O3			4.1	1.5	85	conducting carbon	15
938	Dual Stabilization and Sacrificial Effect of Na2CO3 for Increasing Capacities of Na-Ion Cells Based on P2-NaxMO2 Electrodes	2017	Chemistry of Materials	10.1021/acs.chemmater.7b01542	Capacity	Composition	NaNi0.22Co0.11Mn0.66O2	P2			4.1	1.5	85	conducting carbon	15
939	Will sodium layered oxides ever be competitive for sodium ion battery applications?	2018	Journal of the Electrochemical Society	10.1149/2.0201816jes	Cyclability	Composition	Na0.6Ni0.2Mn0.6Co0.2O2	P2			4.2	1.2	79	super P carbon black	15	Na2CO3	6
940	Will sodium layered oxides ever be competitive for sodium ion battery applications?	2018	Journal of the Electrochemical Society	10.1149/2.0201816jes	Cyclability	Composition	NaNi0.5Mn0.5O2	O3			4.2	1.2	79	super P carbon black	15	Na2CO3	6
941	A rechargeable sodium-ion battery using a nanostructured Sb-C anode and P2-type layered Na0.6Ni0.22Fe0.11Mn0.66O2 cathode	2015	RSC Advances	10.1039/c5ra06336a	Cyclability	Composition	Na0.6Ni0.22Fe0.11Mn0.66O2	P2		layered	4.1	0.7	80	carbon black super P	10	polyvinylidene fluoride (PVdF 6020)	10
942	A rechargeable sodium-ion battery using a nanostructured Sb-C anode and P2-type layered Na0.6Ni0.22Fe0.11Mn0.66O2 cathode	2015	RSC Advances	10.1039/c5ra06336a	Cyclability	Composition	Na0.6Ni0.22Fe0.11Mn0.66O2	P2		layered	4.1	0.7	80	carbon black super P	10	polyvinylidene fluoride (PVdF 6020)	10
943	A rechargeable sodium-ion battery using a nanostructured Sb-C anode and P2-type layered Na0.6Ni0.22Fe0.11Mn0.66O2 cathode	2015	RSC Advances	10.1039/c5ra06336a	Cyclability	Composition	Na0.6Ni0.22Fe0.11Mn0.66O2	P2		layered	4.1	0.7	80	carbon black super P	10	polyvinylidene fluoride (PVdF 6020)	10
944	A rechargeable sodium-ion battery using a nanostructured Sb-C anode and P2-type layered Na0.6Ni0.22Fe0.11Mn0.66O2 cathode	2015	RSC Advances	10.1039/c5ra06336a	Cyclability	Composition	Na0.6Ni0.22Fe0.11Mn0.66O2	P2		layered	4.1	0.7	80	carbon black super P	10	polyvinylidene fluoride (PVdF 6020)	10
945	A rechargeable sodium-ion battery using a nanostructured Sb-C anode and P2-type layered Na0.6Ni0.22Fe0.11Mn0.66O2 cathode	2015	RSC Advances	10.1039/c5ra06336a	Cyclability	Composition	Na0.6Ni0.22Fe0.11Mn0.66O2	P2		layered	4.1	0.7	80	carbon black super P	10	polyvinylidene fluoride (PVdF 6020)	10
